# Supplementary material for: Equivalent T Cell Epitope Promiscuity in Ecologically Diverse Human Pathogens
Source: PubMed Central journal article supplement (PMC3739752; doi:10.1371/journal.pone.0073124), 2013-08-09
Supplement: pone.0073124.s004.pdf [file pone.0073124.s004.pdf]

| <b>Epitope</b> | <b>Source microbe</b> | <b>Source protein</b>        | <b>HLA class</b> |
|----------------|-----------------------|------------------------------|------------------|
| 19039          | Bacillus anthracis    | protective antigen           | I, II            |
| 22071          | Bacillus anthracis    | protective antigen           | I, II            |
| 23488          | Bacillus anthracis    | protective antigen           | I, II            |
| 25594          | Bacillus anthracis    | protective antigen           | I, II            |
| 37302          | Bacillus anthracis    | Lethal factor precursor      | I, II            |
| 38653          | Bacillus anthracis    | protective antigen           | I, II            |
| 43228          | Bacillus anthracis    | protective antigen           | I, II            |
| 44523          | Bacillus anthracis    | protective antigen           | I, II            |
| 48019          | Bacillus anthracis    | Protective antigen precursor | I, II            |
| 54845          | Bacillus anthracis    | Protective antigen precursor | I, II            |
| 57309          | Bacillus anthracis    | Lethal factor precursor      | I, II            |
| 57667          | Bacillus anthracis    | protective antigen           | I, II            |
| 59556          | Bacillus anthracis    | Protective antigen precursor | I, II            |
| 62947          | Bacillus anthracis    | protective antigen           | I, II            |
| 68329          | Bacillus anthracis    | protective antigen           | I, II            |
| 74023          | Bacillus anthracis    | Lethal factor precursor      | I, II            |
| 75137          | Bacillus anthracis    | protective antigen           | I, II            |
| 76444          | Bacillus anthracis    | Lethal factor precursor      | I, II            |
| 76497          | Bacillus anthracis    | Lethal factor precursor      | I, II            |
| 79759          | Bacillus anthracis    | protective antigen precursor | I, II            |
| 79762          | Bacillus anthracis    | protective antigen precursor | I, II            |
| 79791          | Bacillus anthracis    | protective antigen precursor | I, II            |
| 79824          | Bacillus anthracis    | protective antigen precursor | I, II            |
| 79832          | Bacillus anthracis    | protective antigen precursor | I, II            |
| 79862          | Bacillus anthracis    | protective antigen precursor | I, II            |
| 79865          | Bacillus anthracis    | protective antigen precursor | I, II            |
| 79872          | Bacillus anthracis    | protective antigen precursor | I, II            |
| 79882          | Bacillus anthracis    | protective antigen precursor | I, II            |
| 79884          | Bacillus anthracis    | protective antigen precursor | I, II            |
| 79897          | Bacillus anthracis    | protective antigen precursor | I, II            |
| 79902          | Bacillus anthracis    | protective antigen precursor | I, II            |
| 79907          | Bacillus anthracis    | protective antigen precursor | I, II            |
| 79944          | Bacillus anthracis    | protective antigen precursor | I, II            |
| 79951          | Bacillus anthracis    | protective antigen precursor | I, II            |
| 79956          | Bacillus anthracis    | protective antigen precursor | I, II            |
| 79973          | Bacillus anthracis    | protective antigen precursor | I, II            |
| 79990          | Bacillus anthracis    | protective antigen precursor | I, II            |
| 80026          | Bacillus anthracis    | protective antigen precursor | I, II            |
| 80038          | Bacillus anthracis    | protective antigen precursor | I, II            |
| 80046          | Bacillus anthracis    | protective antigen precursor | I, II            |
| 80053          | Bacillus anthracis    | protective antigen precursor | I, II            |
| 80107          | Bacillus anthracis    | protective antigen precursor | I, II            |
| 80549          | Bacillus anthracis    | Lethal factor precursor      | I, II            |
| 81065          | Bacillus anthracis    | Lethal factor                | I, II            |
| 81391          | Bacillus anthracis    | Lethal factor precursor      | I, II            |
| 81557          | Bacillus anthracis    | Lethal factor precursor      | I, II            |
| 81794          | Bacillus anthracis    | Lethal factor precursor      | I, II            |
| 81917          | Bacillus anthracis    | Lethal factor precursor      | I, II            |
| 83206          | Bacillus anthracis    | Lethal factor precursor      | I, II            |
| 83606          | Bacillus anthracis    | Lethal factor                | I, II            |
| 83769          | Bacillus anthracis    | Lethal factor precursor      | I, II            |
| 84202          | Bacillus anthracis    | Lethal factor                | I, II            |
| 84412          | Bacillus anthracis    | Lethal factor precursor      | I, II            |
| 84479          | Bacillus anthracis    | Lethal factor precursor      | I, II            |
| 84775          | Bacillus anthracis    | Lethal factor precursor      | I, II            |
| 85064          | Bacillus anthracis    | Lethal factor precursor      | I, II            |
| 85110          | Bacillus anthracis    | Lethal factor                | I, II            |
| 85311          | Bacillus anthracis    | Lethal factor precursor      | I, II            |
| 86386          | Bacillus anthracis    | lethal factor precursor      | I, II            |
| 86694          | Bacillus anthracis    | lethal factor precursor      | I, II            |
| 86808          | Bacillus anthracis    | Lethal factor precursor      | I, II            |
| 87309          | Bacillus anthracis    | Lethal factor precursor      | I, II            |
| 87624          | Bacillus anthracis    | Lethal factor precursor      | I, II            |
| 87648          | Bacillus anthracis    | Lethal factor precursor      | I, II            |
| 87698          | Bacillus anthracis    | Lethal factor precursor      | I, II            |
| 89938          | Bacillus anthracis    | Lethal factor precursor      | I, II            |
| 90078          | Bacillus anthracis    | Lethal factor precursor      | I, II            |
| 90174          | Bacillus anthracis    | Lethal factor precursor      | I, II            |
| 90856          | Bacillus anthracis    | Lethal factor precursor      | I, II            |
| 96057          | Bacillus anthracis    | Lethal factor precursor      | I, II            |
| 96073          | Bacillus anthracis    | protective antigen           | I, II            |
| 96181          | Bacillus anthracis    | Lethal factor precursor      | I, II            |

|        |                    |                         |       |
|--------|--------------------|-------------------------|-------|
| 96187  | Bacillus anthracis | protective antigen      | I, II |
| 96196  | Bacillus anthracis | Lethal factor precursor | I, II |
| 96218  | Bacillus anthracis | Lethal factor precursor | I, II |
| 96236  | Bacillus anthracis | Lethal factor precursor | I, II |
| 96252  | Bacillus anthracis | protective antigen      | I, II |
| 96265  | Bacillus anthracis | Lethal factor precursor | I, II |
| 96266  | Bacillus anthracis | Lethal factor precursor | I, II |
| 96301  | Bacillus anthracis | Lethal factor precursor | I, II |
| 96326  | Bacillus anthracis | protective antigen      | I, II |
| 96378  | Bacillus anthracis | Lethal factor precursor | I, II |
| 96397  | Bacillus anthracis | protective antigen      | I, II |
| 96472  | Bacillus anthracis | Lethal factor precursor | I, II |
| 96604  | Bacillus anthracis | protective antigen      | I, II |
| 96613  | Bacillus anthracis | Lethal factor precursor | I, II |
| 96644  | Bacillus anthracis | Lethal factor precursor | I, II |
| 96693  | Bacillus anthracis | Lethal factor precursor | I, II |
| 96732  | Bacillus anthracis | protective antigen      | I, II |
| 96774  | Bacillus anthracis | Lethal factor precursor | I, II |
| 96794  | Bacillus anthracis | protective antigen      | I, II |
| 96796  | Bacillus anthracis | protective antigen      | I, II |
| 96810  | Bacillus anthracis | protective antigen      | I, II |
| 96865  | Bacillus anthracis | Lethal factor precursor | I, II |
| 96883  | Bacillus anthracis | Lethal factor precursor | I, II |
| 96922  | Bacillus anthracis | Lethal factor precursor | I, II |
| 97027  | Bacillus anthracis | protective antigen      | I, II |
| 97047  | Bacillus anthracis | protective antigen      | I, II |
| 125850 | Bacillus anthracis | Lethal factor precursor | I, II |
| 125887 | Bacillus anthracis | Lethal factor precursor | I, II |
| 126055 | Bacillus anthracis | Lethal factor precursor | I, II |
| 126615 | Bacillus anthracis | Lethal factor precursor | I, II |
| 126814 | Bacillus anthracis | Lethal factor precursor | I, II |
| 126848 | Bacillus anthracis | Lethal factor precursor | I, II |
| 127230 | Bacillus anthracis | Lethal factor precursor | I, II |
| 127413 | Bacillus anthracis | Lethal factor precursor | I, II |
| 1270   | Clostridium tetani | Tetanus toxin precursor | I, II |
| 1389   | Clostridium tetani | Tetanus toxin precursor | I, II |
| 1501   | Clostridium tetani | Tetanus toxin precursor | I, II |
| 1929   | Clostridium tetani | Tetanus toxin precursor | I, II |
| 2219   | Clostridium tetani | Tetanus toxin precursor | I, II |
| 3156   | Clostridium tetani | Tetanus toxin precursor | I, II |
| 3418   | Clostridium tetani | Tetanus toxin precursor | I, II |
| 3832   | Clostridium tetani | Tetanus toxin precursor | I, II |
| 4449   | Clostridium tetani | Tetanus toxin precursor | I, II |
| 5407   | Clostridium tetani | Tetanus toxin precursor | I, II |
| 7603   | Clostridium tetani | Tetanus toxin precursor | I, II |
| 8658   | Clostridium tetani | Tetanus toxin precursor | I, II |
| 8659   | Clostridium tetani | Tetanus toxin precursor | I, II |
| 8734   | Clostridium tetani | Tetanus toxin precursor | I, II |
| 8778   | Clostridium tetani | Tetanus toxin precursor | I, II |
| 8895   | Clostridium tetani | Tetanus toxin precursor | I, II |
| 8903   | Clostridium tetani | Tetanus toxin precursor | I, II |
| 9297   | Clostridium tetani | Tetanus toxin precursor | I, II |
| 9595   | Clostridium tetani | Tetanus toxin precursor | I, II |
| 9710   | Clostridium tetani | Tetanus toxin precursor | I, II |
| 9716   | Clostridium tetani | Tetanus toxin precursor | I, II |
| 10365  | Clostridium tetani | Tetanus toxin precursor | I, II |
| 10472  | Clostridium tetani | Tetanus toxin precursor | I, II |
| 10743  | Clostridium tetani | Tetanus toxin precursor | I, II |
| 11710  | Clostridium tetani | Tetanus toxin precursor | I, II |
| 12717  | Clostridium tetani | Tetanus toxin precursor | I, II |
| 13078  | Clostridium tetani | Tetanus toxin precursor | I, II |
| 13095  | Clostridium tetani | Tetanus toxin precursor | I, II |
| 13125  | Clostridium tetani | Tetanus toxin precursor | I, II |
| 13813  | Clostridium tetani | Tetanus toxin precursor | I, II |
| 14276  | Clostridium tetani | Tetanus toxin precursor | I, II |
| 14562  | Clostridium tetani | Tetanus toxin precursor | I, II |
| 15411  | Clostridium tetani | Tetanus toxin precursor | I, II |
| 16873  | Clostridium tetani | Tetanus toxin precursor | I, II |
| 17134  | Clostridium tetani | Tetanus toxin precursor | I, II |
| 17193  | Clostridium tetani | Tetanus toxin precursor | I, II |
| 17205  | Clostridium tetani | Tetanus toxin precursor | I, II |
| 17206  | Clostridium tetani | Tetanus toxin           | I, II |
| 17207  | Clostridium tetani | Tetanus toxin precursor | I, II |





|        |                        |                                                                        |       |
|--------|------------------------|------------------------------------------------------------------------|-------|
| 75930  | Clostridium tetani     | Tetanus toxin precursor                                                | I, II |
| 76411  | Clostridium tetani     | Tetanus toxin precursor                                                | I, II |
| 76537  | Clostridium tetani     | Tetanus toxin precursor                                                | I, II |
| 113407 | Clostridium tetani     | Tetanus toxin precursor                                                | I, II |
| 127968 | Clostridium tetani     | Tetanus toxin precursor                                                | I, II |
| 128003 | Clostridium tetani     | Tetanus toxin precursor                                                | I, II |
| 128013 | Clostridium tetani     | Tetanus toxin precursor                                                | I, II |
| 128081 | Clostridium tetani     | Tetanus toxin precursor                                                | I, II |
| 79786  | Clostridium tetani E88 | tetanus toxin tetX                                                     | I, II |
| 79793  | Clostridium tetani E88 | tetanus toxin tetX                                                     | I, II |
| 79808  | Clostridium tetani E88 | tetanus toxin tetX                                                     | I, II |
| 79816  | Clostridium tetani E88 | tetanus toxin tetX                                                     | I, II |
| 79870  | Clostridium tetani E88 | tetanus toxin tetX                                                     | I, II |
| 79876  | Clostridium tetani E88 | tetanus toxin tetX                                                     | I, II |
| 79883  | Clostridium tetani E88 | tetanus toxin tetX                                                     | I, II |
| 79915  | Clostridium tetani E88 | tetanus toxin tetX                                                     | I, II |
| 79941  | Clostridium tetani E88 | tetanus toxin tetX                                                     | I, II |
| 79972  | Clostridium tetani E88 | tetanus toxin tetX                                                     | I, II |
| 79984  | Clostridium tetani E88 | tetanus toxin tetX                                                     | I, II |
| 79985  | Clostridium tetani E88 | tetanus toxin tetX                                                     | I, II |
| 79996  | Clostridium tetani E88 | tetanus toxin tetX                                                     | I, II |
| 80030  | Clostridium tetani E88 | tetanus toxin tetX                                                     | I, II |
| 80048  | Clostridium tetani E88 | tetanus toxin tetX                                                     | I, II |
| 80054  | Clostridium tetani E88 | tetanus toxin tetX                                                     | I, II |
| 2213   | Streptococcus pyogenes | M protein                                                              | I, II |
| 2222   | Streptococcus pyogenes | M protein, serotype 12 precursor                                       | I, II |
| 2506   | Streptococcus pyogenes | M protein, serotype 5 precursor                                        | I, II |
| 3420   | Streptococcus pyogenes | M protein                                                              | I, II |
| 4740   | Streptococcus pyogenes | M protein                                                              | I, II |
| 8930   | Streptococcus pyogenes | M5                                                                     | I, II |
| 12645  | Streptococcus pyogenes | M protein, serotype 12 precursor                                       | I, II |
| 12945  | Streptococcus pyogenes | M protein                                                              | I, II |
| 13865  | Streptococcus pyogenes | M protein, serotype 12 precursor                                       | I, II |
| 14426  | Streptococcus pyogenes | M protein                                                              | I, II |
| 22026  | Streptococcus pyogenes | M protein, serotype 12 precursor                                       | I, II |
| 29866  | Streptococcus pyogenes | M protein                                                              | I, II |
| 30176  | Streptococcus pyogenes | M protein, serotype 12 precursor                                       | I, II |
| 31797  | Streptococcus pyogenes | M protein, serotype 12 precursor                                       | I, II |
| 31798  | Streptococcus pyogenes | Plasminogen-binding group A streptococcal M-like protein PAM precursor | I, II |
| 33019  | Streptococcus pyogenes | M protein, serotype 12 precursor                                       | I, II |
| 33057  | Streptococcus pyogenes | M5                                                                     | I, II |
| 33459  | Streptococcus pyogenes | M protein, serotype 12 precursor                                       | I, II |
| 35679  | Streptococcus pyogenes | M protein                                                              | I, II |
| 39183  | Streptococcus pyogenes | M protein                                                              | I, II |
| 44894  | Streptococcus pyogenes | Plasminogen-binding group A streptococcal M-like protein PAM precursor | I, II |
| 45666  | Streptococcus pyogenes | M protein, serotype 12 precursor                                       | I, II |
| 52184  | Streptococcus pyogenes | M protein, serotype 5 precursor                                        | I, II |
| 60642  | Streptococcus pyogenes | M protein, serotype 12 precursor                                       | I, II |
| 61850  | Streptococcus pyogenes | M5 protein                                                             | I, II |
| 63417  | Streptococcus pyogenes | Plasminogen-binding group A streptococcal M-like protein PAM precursor | I, II |
| 66083  | Streptococcus pyogenes | M protein                                                              | I, II |
| 67183  | Streptococcus pyogenes | M protein                                                              | I, II |
| 122211 | Streptococcus pyogenes | M5                                                                     | I, II |
| 129727 | Streptococcus pyogenes | PTS system, lactose-specific HIBC component                            | I, II |
| 131873 | Streptococcus pyogenes | M protein                                                              | I, II |
| 131948 | Streptococcus pyogenes | M5                                                                     | I, II |
| 132974 | Streptococcus pyogenes | M6 protein - Streptococcus pyogenes                                    | I, II |
| 132986 | Streptococcus pyogenes | M6 protein - Streptococcus pyogenes                                    | I, II |
| 132989 | Streptococcus pyogenes | M6 protein - Streptococcus pyogenes                                    | I, II |
| 132992 | Streptococcus pyogenes | M6 protein - Streptococcus pyogenes                                    | I, II |
| 133042 | Streptococcus pyogenes | M6 protein - Streptococcus pyogenes                                    | I, II |
| 133060 | Streptococcus pyogenes | M6 protein - Streptococcus pyogenes                                    | I, II |
| 133111 | Streptococcus pyogenes | M6 protein - Streptococcus pyogenes                                    | I, II |
| 133162 | Streptococcus pyogenes | M6 protein - Streptococcus pyogenes                                    | I, II |
| 133376 | Streptococcus pyogenes | M6 protein - Streptococcus pyogenes                                    | I, II |
| 133381 | Streptococcus pyogenes | M6 protein - Streptococcus pyogenes                                    | I, II |
| 134497 | Streptococcus pyogenes | M protein                                                              | I, II |
| 135552 | Streptococcus pyogenes | RopA                                                                   | I, II |
| 135605 | Streptococcus pyogenes | ScnM                                                                   | I, II |
| 142116 | Streptococcus pyogenes | M protein                                                              | I, II |
| 142125 | Streptococcus pyogenes | M protein, serotype 5 precursor                                        | I, II |
| 142166 | Streptococcus pyogenes | M protein, serotype 5 precursor                                        | I, II |
| 142167 | Streptococcus pyogenes | M protein                                                              | I, II |

|        |                                     |                                           |       |
|--------|-------------------------------------|-------------------------------------------|-------|
| 142200 | Streptococcus pyogenes              | M protein                                 | I, II |
| 142201 | Streptococcus pyogenes              | M protein                                 | I, II |
| 142202 | Streptococcus pyogenes              | M protein                                 | I, II |
| 142204 | Streptococcus pyogenes              | M protein                                 | I, II |
| 142217 | Streptococcus pyogenes              | M protein, serotype 5 precursor           | I, II |
| 142226 | Streptococcus pyogenes              | M protein, serotype 5 precursor           | I, II |
| 142282 | Streptococcus pyogenes              | M protein, serotype 5 precursor           | I, II |
| 142288 | Streptococcus pyogenes              | M protein                                 | I, II |
| 67779  | Streptococcus pyogenes serotype M24 | M protein, serotype 24 precursor          | I, II |
| 2220   | Streptococcus pyogenes serotype M5  | M protein, serotype 5 precursor           | I, II |
| 3710   | Streptococcus pyogenes serotype M5  | M protein, serotype 5 precursor           | I, II |
| 5586   | Streptococcus pyogenes serotype M5  | M protein                                 | I, II |
| 8920   | Streptococcus pyogenes serotype M5  | M protein, serotype 5 precursor           | I, II |
| 8931   | Streptococcus pyogenes serotype M5  | M protein, serotype 5 precursor           | I, II |
| 11150  | Streptococcus pyogenes serotype M5  | M protein, serotype 5 precursor           | I, II |
| 13866  | Streptococcus pyogenes serotype M5  | M protein, serotype 5 precursor           | I, II |
| 21453  | Streptococcus pyogenes serotype M5  | M protein, serotype 5 precursor           | I, II |
| 26328  | Streptococcus pyogenes serotype M5  | M protein, serotype 5 precursor           | I, II |
| 31004  | Streptococcus pyogenes serotype M5  | M protein, serotype 5 precursor           | I, II |
| 32047  | Streptococcus pyogenes serotype M5  | M protein, serotype 5 precursor           | I, II |
| 32048  | Streptococcus pyogenes serotype M5  | M protein, serotype 5 precursor           | I, II |
| 32190  | Streptococcus pyogenes serotype M5  | M protein, serotype 5 precursor           | I, II |
| 36841  | Streptococcus pyogenes serotype M5  | M protein, serotype 5 precursor           | I, II |
| 41143  | Streptococcus pyogenes serotype M5  | M protein, serotype 5 precursor           | I, II |
| 44463  | Streptococcus pyogenes serotype M5  | M protein, serotype 5 precursor           | I, II |
| 47492  | Streptococcus pyogenes serotype M5  | M protein, serotype 5 precursor           | I, II |
| 50296  | Streptococcus pyogenes serotype M5  | M protein, serotype 5 precursor           | I, II |
| 51486  | Streptococcus pyogenes serotype M5  | M protein, serotype 5 precursor           | I, II |
| 57290  | Streptococcus pyogenes serotype M5  | M protein, serotype 5 precursor           | I, II |
| 64312  | Streptococcus pyogenes serotype M5  | M protein, serotype 5 precursor           | I, II |
| 66084  | Streptococcus pyogenes serotype M5  | M protein, serotype 5 precursor           | I, II |
| 69186  | Streptococcus pyogenes serotype M5  | M protein, serotype 5 precursor           | I, II |
| 122615 | Streptococcus pyogenes serotype M5  | M protein                                 | I, II |
| 56291  | Streptococcus pyogenes serotype M6  | M protein                                 | I, II |
| 10411  | Vibrio cholerae                     | toxin                                     | I, II |
| 28896  | Vibrio cholerae                     | toxin                                     | I, II |
| 194    | Mycobacterium tuberculosis          | Hypothetical protein esxG                 | I     |
| 327    | Mycobacterium tuberculosis          | 10 kDa culture filtrate antigen EsxB      | I     |
| 447    | Mycobacterium tuberculosis H37Rv    | Antigen 85-A precursor                    | I     |
| 1079   | Mycobacterium tuberculosis          | ESAT-6-like protein esxB                  | I     |
| 1080   | Mycobacterium tuberculosis          | ESAT-6-like protein esxB                  | I     |
| 1857   | Mycobacterium tuberculosis          | mycocerosic acid synthase                 | I     |
| 2058   | Mycobacterium tuberculosis          | 6 kDa early secretory antigenic target    | I     |
| 2135   | Mycobacterium tuberculosis          | Antigen 85-A precursor                    | I     |
| 2490   | Mycobacterium tuberculosis          | CYTOTOXIN HAEMOLYSIN HOMOLOGUE TLYA       | I     |
| 2556   | Mycobacterium tuberculosis          | PE_PGRS 33                                | I     |
| 2733   | Mycobacterium tuberculosis          | Enoyl-                                    | I     |
| 2968   | Mycobacterium tuberculosis          | PstA-1                                    | I     |
| 2969   | Mycobacterium tuberculosis          | PstA-1                                    | I     |
| 3030   | Mycobacterium tuberculosis          | Antigen 85-A precursor                    | I     |
| 3060   | Mycobacterium tuberculosis          | thymidylate synthase                      | I     |
| 3064   | Mycobacterium tuberculosis          | 6 kDa early secretory antigenic target    | I     |
| 3094   | Mycobacterium tuberculosis          | Antigen 85-B precursor                    | I     |
| 3097   | Mycobacterium tuberculosis H37Rv    | Antigen 85-A precursor                    | I     |
| 3118   | Mycobacterium tuberculosis          | Antigen 85-C precursor                    | I     |
| 3153   | Mycobacterium tuberculosis          | 60 kDa chaperonin 2                       | I     |
| 3167   | Mycobacterium avium                 | Enoyl-                                    | I     |
| 3189   | Mycobacterium tuberculosis H37Rv    | Antigen 85-A precursor                    | I     |
| 3935   | Mycobacterium tuberculosis          | 10 kDa culture filtrate antigen EsxB      | I     |
| 4002   | Mycobacterium tuberculosis H37Rv    | PPE family protein                        | I     |
| 4682   | Mycobacterium tuberculosis          | LOW MOLECULAR WEIGHT T-CELL ANTIGEN TB8.4 | I     |
| 4897   | Mycobacterium tuberculosis          | 6 kDa early secretory antigenic target    | I     |
| 5196   | Mycobacterium tuberculosis          | 60 kDa chaperonin 2                       | I     |
| 5220   | Mycobacterium tuberculosis          | 14 kDa antigen                            | I     |
| 5251   | Mycobacterium tuberculosis          | Lipoprotein lpqH precursor                | I     |
| 5361   | Mycobacterium tuberculosis          | alanine dehydrogenase                     | I     |
| 5381   | Mycobacterium tuberculosis          | LOW MOLECULAR WEIGHT T-CELL ANTIGEN TB8.4 | I     |
| 5623   | Mycobacterium tuberculosis          | Antigen 85-B precursor                    | I     |
| 6901   | Mycobacterium tuberculosis          | Antigen 85-B precursor                    | I     |
| 8685   | Mycobacterium tuberculosis          | Antigen 85-B precursor                    | I     |
| 9099   | Mycobacterium tuberculosis H37Rv    | Antigen 85-A precursor                    | I     |
| 9414   | Mycobacterium tuberculosis          | Superoxide dismutase                      | I     |
| 9415   | Mycobacterium tuberculosis          | Superoxide dismutase                      | I     |

|       |                                         |                                                            |   |
|-------|-----------------------------------------|------------------------------------------------------------|---|
| 9416  | Mycobacterium tuberculosis H37Rv        | Antigen 85-A precursor                                     | I |
| 9920  | Mycobacterium tuberculosis              | ESAT-6-like protein esxB                                   | I |
| 10133 | Mycobacterium tuberculosis H37Rv        | Antigen 85-A precursor                                     | I |
| 12062 | Mycobacterium tuberculosis              | hypothetical glycine-rich protein Rv381                    | I |
| 12583 | Mycobacterium tuberculosis H37Rv        | ESAT-6-like protein esxB                                   | I |
| 12585 | Mycobacterium tuberculosis H37Rv        | 10 kDa culture filtrate antigen EsxB                       | I |
| 13215 | Mycobacterium tuberculosis              | Antigen 85-B                                               | I |
| 13381 | Mycobacterium tuberculosis              | 14 kDa antigen                                             | I |
| 13386 | Mycobacterium tuberculosis              | ESAT-6-like protein esxB                                   | I |
| 13473 | Mycobacterium tuberculosis              | Antigen 85-B precursor                                     | I |
| 13787 | Mycobacterium tuberculosis              | Probable signal peptidase I                                | I |
| 14372 | Mycobacterium tuberculosis H37Rv        | Antigen 85-A precursor                                     | I |
| 15768 | Mycobacterium tuberculosis H37Rv        | Antigen 85-A precursor                                     | I |
| 16332 | Mycobacterium tuberculosis              | Antigen 85-B precursor                                     | I |
| 16333 | Mycobacterium tuberculosis              | Antigen 85-B precursor                                     | I |
| 16570 | Mycobacterium tuberculosis H37Rv        | Antigen 85-A precursor                                     | I |
| 16705 | Mycobacterium tuberculosis              | Acetyl-/propionyl-coenzyme A carboxylase alpha chain       | I |
| 16739 | Mycobacterium tuberculosis              | Phosphate-binding protein pstS 1 precursor                 | I |
| 16773 | Mycobacterium tuberculosis              | Elongation factor Tu                                       | I |
| 16910 | Mycobacterium tuberculosis              | mycocerosic acid synthase                                  | I |
| 16924 | Mycobacterium tuberculosis              | Antigen 85-B precursor                                     | I |
| 17099 | Mycobacterium tuberculosis              | Putative virulence-regulating 38 kDa protein               | I |
| 17728 | Mycobacterium tuberculosis H37Rv        | Antigen 85-A precursor                                     | I |
| 18276 | Mycobacterium tuberculosis              | Antigen 85-B precursor                                     | I |
| 18312 | Mycobacterium tuberculosis              | PstA-1                                                     | I |
| 18464 | Mycobacterium tuberculosis H37Rv        | Antigen 85-A precursor                                     | I |
| 18550 | Mycobacterium tuberculosis              | 14 kDa antigen                                             | I |
| 18744 | Mycobacterium tuberculosis H37Rv        | Antigen 85-A precursor                                     | I |
| 18811 | Mycobacterium tuberculosis H37Rv        | Antigen 85-A precursor                                     | I |
| 19348 | Mycobacterium tuberculosis              | IMMUNOGENIC PROTEIN MPT64 (ANTIGEN MPT64/MPB64)            | I |
| 19359 | Mycobacterium tuberculosis              | IMMUNOGENIC PROTEIN MPT64 (ANTIGEN MPT64/MPB64)            | I |
| 19878 | Mycobacterium tuberculosis H37Rv        | Antigen 85-A precursor                                     | I |
| 20369 | Mycobacterium tuberculosis              | 14 kDa antigen                                             | I |
| 20475 | Mycobacterium tuberculosis              | PROBABLE SERINE PROTEASE PEPA (MTB32A)                     | I |
| 20481 | Mycobacterium tuberculosis              | PstA-1                                                     | I |
| 20503 | Mycobacterium tuberculosis H37Rv        | Antigen 85-A precursor                                     | I |
| 20615 | Mycobacterium tuberculosis H37Rv        | Antigen 85-A precursor                                     | I |
| 20761 | Mycobacterium tuberculosis              | 3-phosphoshikimate 1-carboxyvinyltransferase               | I |
| 20859 | Mycobacterium tuberculosis              | 60 kDa chaperonin 2                                        | I |
| 20860 | Mycobacterium tuberculosis              | 60 kDa chaperonin 2                                        | I |
| 20883 | Mycobacterium tuberculosis              | mycocerosic acid synthase                                  | I |
| 20910 | Mycobacterium tuberculosis H37Ra        | ISONIAZID INDUCTIBLE GENE PROTEIN INIB                     | I |
| 20911 | Mycobacterium tuberculosis H37Ra        | ISONIAZID INDUCTIBLE GENE PROTEIN INIB                     | I |
| 20912 | Mycobacterium tuberculosis H37Ra        | ISONIAZID INDUCTIBLE GENE PROTEIN INIB                     | I |
| 21000 | Mycobacterium tuberculosis              | Glutamine synthetase 1                                     | I |
| 21040 | Mycobacterium tuberculosis              | PstA-1                                                     | I |
| 21078 | Mycobacterium tuberculosis              | Antigen 85-A precursor                                     | I |
| 21153 | Mycobacterium tuberculosis              | Alanine dehydrogenase                                      | I |
| 21185 | Mycobacterium tuberculosis              | DNA gyrase subunit B                                       | I |
| 21222 | Mycobacterium tuberculosis              | diaminopimelate decarboxylase                              | I |
| 21231 | Mycobacterium tuberculosis              | Putative virulence-regulating 38 kDa protein               | I |
| 21240 | Mycobacterium tuberculosis              | Acetyl-/propionyl-coenzyme A carboxylase alpha chain       | I |
| 21243 | Mycobacterium tuberculosis              | DNA-directed RNA polymerase subunit beta'                  | I |
| 21275 | Mycobacterium tuberculosis              | Antigen 85-B precursor                                     | I |
| 21780 | Mycobacterium tuberculosis              | Antigen 85-B precursor                                     | I |
| 21960 | Mycobacterium tuberculosis              | Antigen 85-B precursor                                     | I |
| 21976 | Mycobacterium tuberculosis              | 10 kDa culture filtrate antigen EsxB                       | I |
| 22633 | Mycobacterium tuberculosis              | Immunogenic protein MPT64 precursor                        | I |
| 23306 | Mycobacterium tuberculosis              | ESAT-6-like protein esxH                                   | I |
| 26791 | Mycobacterium tuberculosis H37Rv        | Antigen 85-A precursor                                     | I |
| 27053 | Mycobacterium tuberculosis              | alanine dehydrogenase                                      | I |
| 27191 | Mycobacterium tuberculosis              | PstA-1                                                     | I |
| 27363 | Mycobacterium tuberculosis              | unnamed protein product                                    | I |
| 27447 | Mycobacterium tuberculosis str. Haarlem | PPE family protein                                         | I |
| 27586 | Mycobacterium sp. KMS                   | Hypothetical protein                                       | I |
| 27786 | Mycobacterium tuberculosis H37Rv        | Antigen 85-B precursor                                     | I |
| 27900 | Mycobacterium tuberculosis H37Rv        | PROBABLE TRANSPOSASE FOR INSERTION SEQUENCE ELEMENT IS1081 | I |
| 27901 | Mycobacterium tuberculosis              | Antigen 85-B precursor                                     | I |
| 27981 | Mycobacterium tuberculosis              | Immunogenic protein MPT64 precursor                        | I |
| 28040 | Mycobacterium tuberculosis H37Rv        | hypothetical protein Rv1461                                | I |
| 28364 | Mycobacterium tuberculosis              | ESAT-6-like protein esxB                                   | I |
| 28506 | Mycobacterium tuberculosis              | 10 kDa culture filtrate antigen EsxB                       | I |
| 28594 | Mycobacterium tuberculosis              | Immunogenic protein MPT64 precursor                        | I |

|       |                                  |                                                    |   |
|-------|----------------------------------|----------------------------------------------------|---|
| 29558 | Mycobacterium tuberculosis       | Antigen 85-B precursor                             | I |
| 31250 | Mycobacterium tuberculosis       | Immunogenic protein MPT64 precursor                | I |
| 31749 | Mycobacterium tuberculosis       | 60 KDA chaperonin 2 groel2                         | I |
| 31902 | Mycobacterium tuberculosis       | Antigen 85-A precursor                             | I |
| 32103 | Mycobacterium tuberculosis       | 60 kDa chaperonin (Protein Cpn60) (groEL protein)  | I |
| 32186 | Mycobacterium tuberculosis       | mycocerosic acid synthase                          | I |
| 32213 | Mycobacterium tuberculosis       | Antigen 85-B precursor                             | I |
| 32710 | Mycobacterium tuberculosis H37Rv | hypothetical protein Rv3467                        | I |
| 32860 | Mycobacterium tuberculosis H37Rv | endonuclease IV                                    | I |
| 34866 | Mycobacterium tuberculosis       | PstA-1                                             | I |
| 34928 | Mycobacterium tuberculosis       | 10 kDa culture filtrate antigen EsxB               | I |
| 35785 | Mycobacterium tuberculosis       | 14 kDa antigen                                     | I |
| 37069 | Mycobacterium tuberculosis       | 60 kDa chaperonin 2                                | I |
| 37075 | Mycobacterium tuberculosis       | ISMt1 transposase B                                | I |
| 37084 | Mycobacterium tuberculosis       | Glutamine synthetase 1                             | I |
| 37109 | Mycobacterium tuberculosis       | mycocerosic acid synthase                          | I |
| 37112 | Mycobacterium tuberculosis       | Phosphate-binding protein pstS 1 precursor         | I |
| 37118 | Mycobacterium tuberculosis       | Immunogenic protein MPT64 precursor                | I |
| 37140 | Mycobacterium tuberculosis       | Hypothetical protein esxG                          | I |
| 37146 | Mycobacterium tuberculosis       | 6 kDa early secretory antigenic target             | I |
| 37155 | Mycobacterium tuberculosis H37Rv | Antigen 85-A precursor                             | I |
| 37272 | Mycobacterium tuberculosis       | tuberculin-like peptide                            | I |
| 37296 | Mycobacterium tuberculosis       | DNA gyrase subunit B                               | I |
| 37297 | Mycobacterium tuberculosis       | DNA gyrase subunit B                               | I |
| 37365 | Mycobacterium tuberculosis       | DnaK                                               | I |
| 37476 | Mycobacterium tuberculosis       | DnaK                                               | I |
| 37483 | Mycobacterium tuberculosis       | mycocerosic acid synthase                          | I |
| 37667 | Mycobacterium bovis              | DNA-directed RNA polymerase subunit beta'          | I |
| 37785 | Mycobacterium tuberculosis       | Alanine dehydrogenase                              | I |
| 37835 | Mycobacterium tuberculosis       | PROBABLE SERINE PROTEASE PEPA (MTB32A)             | I |
| 37951 | Mycobacterium tuberculosis       | Peroxidase/catalase T                              | I |
| 38049 | Mycobacterium tuberculosis       | Antigen 85-B precursor                             | I |
| 38050 | Mycobacterium tuberculosis       | Antigen 85-B precursor                             | I |
| 38071 | Mycobacterium tuberculosis       | DNA-binding response regulator mtrA                | I |
| 38515 | Mycobacterium tuberculosis H37Rv | Phosphate-binding protein pstS 1 precursor         | I |
| 38969 | Mycobacterium tuberculosis H37Rv | Antigen 85-A precursor                             | I |
| 40361 | Mycobacterium tuberculosis H37Rv | Antigen 85-A precursor                             | I |
| 40622 | Mycobacterium tuberculosis       | CYTOTOXIN HAEMOLYSIN HOMOLOGUE TLYA                | I |
| 41030 | Mycobacterium tuberculosis       | 10 KDA CULTURE FILTRATE ANTIGEN ESXB (LHP) (CFP10) | I |
| 41078 | Mycobacterium tuberculosis       | thymidylate synthase                               | I |
| 41558 | Mycobacterium tuberculosis H37Rv | Antigen 85-A precursor                             | I |
| 41618 | Mycobacterium tuberculosis H37Rv | Antigen 85-A precursor                             | I |
| 41910 | Mycobacterium tuberculosis       | mycocerosic acid synthase                          | I |
| 41911 | Mycobacterium tuberculosis       | Peroxidase/catalase T                              | I |
| 41947 | Mycobacterium tuberculosis       | mtp40 protein - Mycobacterium tuberculosis         | I |
| 42038 | Mycobacterium tuberculosis       | 60 kDa chaperonin 2                                | I |
| 42342 | Mycobacterium tuberculosis       | Antigen 85-B precursor                             | I |
| 42393 | Mycobacterium tuberculosis H37Rv | Antigen 85-A precursor                             | I |
| 42897 | Mycobacterium bovis              | DNA-directed RNA polymerase subunit beta           | I |
| 43447 | Mycobacterium tuberculosis       | Immunogenic protein MPT64 precursor                | I |
| 44327 | Mycobacterium tuberculosis       | ESAT-6-like protein esxB                           | I |
| 44802 | Mycobacterium tuberculosis       | hypothetical glycine-rich protein Rv3812           | I |
| 46499 | Mycobacterium tuberculosis       | 6 kDa early secretory antigenic target             | I |
| 46625 | Mycobacterium tuberculosis       | hypothetical glycine-rich protein Rv3812           | I |
| 48458 | Mycobacterium tuberculosis       | Immunogenic protein MPT64 precursor                | I |
| 48580 | Mycobacterium bovis              | PPE FAMILY PROTEIN                                 | I |
| 51104 | Mycobacterium tuberculosis H37Rv | LOW MOLECULAR WEIGHT PROTEIN ANTIGEN 7 ESXH        | I |
| 51535 | Mycobacterium tuberculosis       | Glutamine synthetase 1                             | I |
| 51643 | Mycobacterium tuberculosis       | Immunogenic protein MPT64 precursor                | I |
| 52431 | Mycobacterium tuberculosis       | Antigen 85-B precursor                             | I |
| 52690 | Mycobacterium tuberculosis       | 10 kDa culture filtrate antigen EsxB               | I |
| 53077 | Mycobacterium tuberculosis H37Rv | ESAT-6-like protein esxB                           | I |
| 53370 | Mycobacterium tuberculosis       | IMMUNOGENIC PROTEIN MPT64 (ANTIGEN MPT64/MP64)     | I |
| 54122 | Mycobacterium tuberculosis       | alanine dehydrogenase                              | I |
| 54635 | Mycobacterium tuberculosis       | Tuberculin-active protein                          | I |
| 54671 | Mycobacterium tuberculosis       | Antigen 85-B precursor                             | I |
| 54704 | Mycobacterium tuberculosis       | Uncharacterized protein Rv2715/MT2788              | I |
| 54722 | Mycobacterium tuberculosis       | Peroxidase/catalase T                              | I |
| 54812 | Mycobacterium tuberculosis       | secreted antigen Ag85A                             | I |
| 54878 | Mycobacterium tuberculosis       | thymidylate synthase                               | I |
| 54950 | Mycobacterium tuberculosis       | PstA-1                                             | I |
| 55156 | Mycobacterium tuberculosis H37Rv | hypothetical protein Rv1945                        | I |
| 55188 | Mycobacterium tuberculosis H37Rv | translation initiation factor IF-3                 | I |

|        |                                             |                                                              |   |
|--------|---------------------------------------------|--------------------------------------------------------------|---|
| 55191  | Mycobacterium tuberculosis H37Rv            | PROBABLE CONSERVED TRANSMEMBRANE PROTEIN                     | I |
| 55192  | Mycobacterium tuberculosis                  | Hypothetical protein                                         | I |
| 55199  | Mycobacterium tuberculosis H37Rv            | 1-acylglycerol-3-phosphate O-acyltransferase                 | I |
| 55315  | Mycobacterium tuberculosis CDC1551          | CRISPR-associated protein, TM1811 family                     | I |
| 55324  | Mycobacterium tuberculosis H37Rv            | PROBABLE PERIPLASMIC OLIGOPEPTIDE-BINDING LIPOPROTEIN OPPA   | I |
| 55334  | Mycobacterium tuberculosis H37Rv            | PROBABLE NAD-DEPENDENT GLUTAMATE DEHYDROGENASE GDH           | I |
| 58045  | Mycobacterium tuberculosis H37Rv            | Antigen 85-A precursor                                       | I |
| 58994  | Mycobacterium tuberculosis                  | Putative virulence-regulating 38 kDa protein                 | I |
| 59099  | Mycobacterium tuberculosis                  | 14 kDa antigen                                               | I |
| 59250  | Mycobacterium tuberculosis                  | DnaK                                                         | I |
| 59251  | Mycobacterium tuberculosis                  | DnaK                                                         | I |
| 59594  | Mycobacterium tuberculosis                  | PstA-1                                                       | I |
| 59595  | Mycobacterium tuberculosis                  | PstA-1                                                       | I |
| 59627  | Mycobacterium tuberculosis                  | Antigen 85-B precursor                                       | I |
| 60095  | Mycobacterium tuberculosis H37Rv            | hypothetical protein Rv3714c                                 | I |
| 62797  | Mycobacterium tuberculosis                  | ESAT-6-like protein esxB                                     | I |
| 63957  | Mycobacterium tuberculosis H37Rv            | Antigen 85-A precursor                                       | I |
| 64412  | Mycobacterium tuberculosis                  | PE_PGRS 33                                                   | I |
| 64714  | Mycobacterium tuberculosis                  | MPT51/MPB51 antigen precursor                                | I |
| 64949  | Mycobacterium tuberculosis                  | Phosphate-binding protein pstS 1 precursor                   | I |
| 65965  | Mycobacterium tuberculosis                  | Immunogenic protein MPT64 precursor                          | I |
| 67077  | Mycobacterium tuberculosis                  | 3-phosphohikimate 1-carboxyvinyltransferase                  | I |
| 68413  | Mycobacterium tuberculosis H37Rv            | Antigen 85-A precursor                                       | I |
| 69514  | Mycobacterium tuberculosis                  | Alanine and proline-rich secreted protein apa precursor      | I |
| 69532  | Mycobacterium tuberculosis                  | mycocerosic acid synthase                                    | I |
| 69584  | Mycobacterium tuberculosis                  | DNA gyrase subunit B                                         | I |
| 69608  | Mycobacterium tuberculosis                  | DnaK                                                         | I |
| 69646  | Mycobacterium tuberculosis                  | Alanine dehydrogenase                                        | I |
| 69798  | Mycobacterium tuberculosis                  | Lipoprotein lpqH precursor                                   | I |
| 70507  | Mycobacterium tuberculosis H37Rv            | Soluble secreted antigen MPT53 precursor                     | I |
| 70687  | Mycobacterium tuberculosis                  | 10 kDa culture filtrate antigen EsxB                         | I |
| 71338  | Mycobacterium tuberculosis H37Rv            | Antigen 85-A precursor                                       | I |
| 71765  | Mycobacterium tuberculosis H37Rv            | Antigen 85-A precursor                                       | I |
| 72750  | Mycobacterium tuberculosis                  | mycocerosic acid synthase                                    | I |
| 72756  | Mycobacterium tuberculosis                  | PROBABLE SERINE PROTEASE PEPA (MTB32A)                       | I |
| 72770  | Mycobacterium tuberculosis H37Rv            | Antigen 85-A precursor                                       | I |
| 72837  | Mycobacterium tuberculosis                  | DNA-directed RNA polymerase subunit beta'                    | I |
| 72965  | Mycobacterium tuberculosis H37Rv            | Antigen 85-C precursor                                       | I |
| 72985  | Mycobacterium tuberculosis H37Rv            | LOW MOLECULAR WEIGHT PROTEIN ANTIGEN 7 ESXH                  | I |
| 73003  | Mycobacterium tuberculosis H37Rv            | Antigen 85-A precursor                                       | I |
| 73234  | Mycobacterium tuberculosis H37Rv            | Antigen 85-A precursor                                       | I |
| 73306  | Mycobacterium tuberculosis                  | Antigen 85-B precursor                                       | I |
| 74130  | Mycobacterium tuberculosis H37Rv            | Antigen 85-A precursor                                       | I |
| 74606  | Mycobacterium tuberculosis                  | Protein not available                                        | I |
| 74761  | Mycobacterium tuberculosis                  | 3-dehydroquinate dehydratase                                 | I |
| 74768  | Mycobacterium tuberculosis                  | Antigen 85-B precursor                                       | I |
| 74914  | Mycobacterium tuberculosis                  | Phosphate-binding protein pstS 1 precursor                   | I |
| 74927  | Mycobacterium tuberculosis                  | Putative virulence-regulating 38 kDa protein                 | I |
| 75030  | Mycobacterium tuberculosis                  | Putative virulence-regulating 38 kDa protein                 | I |
| 76221  | Mycobacterium tuberculosis                  | Antigen 85-C precursor                                       | I |
| 87675  | Mycobacterium tuberculosis                  | 6 kDa early secretory antigenic target                       | I |
| 92301  | Mycobacterium bovis BCG str. Pasteur 1173P2 | ATP-dependent Clp protease proteolytic subunit               | I |
| 92817  | Mycobacterium tuberculosis                  | Secreted antigen Ag85B                                       | I |
| 93270  | Mycobacterium tuberculosis                  | Hypothetical protein                                         | I |
| 108957 | Mycobacterium tuberculosis                  | hypothetical protein                                         | I |
| 108965 | Mycobacterium tuberculosis                  | Prolipoprotein diacylglyceryl transferase                    | I |
| 124973 | Mycobacterium tuberculosis H37Rv            | Esat-6 like protein esxJ (Esat-6 like protein 2)             | I |
| 126028 | Mycobacterium tuberculosis CDC1551          | ATP-dependent helicase                                       | I |
| 136142 | Mycobacterium tuberculosis H37Rv            | PROBABLE CUTINASE PRECURSOR CFP21                            | I |
| 137437 | Mycobacterium tuberculosis                  | Esat-6 like protein esxJ (Esat-6 like protein 2)             | I |
| 138865 | Mycobacterium tuberculosis                  | D-alanyl-D-alanine carboxypeptidase                          | I |
| 138896 | Mycobacterium tuberculosis                  | Hypothetical protein                                         | I |
| 140541 | Mycobacterium tuberculosis H37Rv            | hypothetical protein                                         | I |
| 140542 | Mycobacterium tuberculosis H37Rv            | MCE-family protein MCE4B                                     | I |
| 140543 | Mycobacterium tuberculosis                  | Uncharacterized glycosyl hydrolase Rv2006/MT2062             | I |
| 140561 | Mycobacterium tuberculosis H37Rv            | metal cation transporter P-type ATPase A CtpF                | I |
| 140564 | Mycobacterium tuberculosis H37Rv            | esterase lipoprotein LpqC                                    | I |
| 140576 | Mycobacterium tuberculosis H37Rv            | secreted L-alanine dehydrogenase ALD (40 kDa antigen) (TB43) | I |
| 140597 | Mycobacterium tuberculosis H37Rv            | MCE-family protein MCE4A                                     | I |
| 140599 | Mycobacterium tuberculosis H37Rv            | MCE-family lipoprotein LprL                                  | I |
| 140600 | Mycobacterium tuberculosis H37Rv            | glutamine synthetase GLNA1 (glutamine synthase) (GS-I)       | I |
| 140615 | Mycobacterium tuberculosis H37Rv            | amino acid decarboxylase                                     | I |
| 140616 | Mycobacterium tuberculosis H37Rv            | membrane-associated phospholipase C                          | I |

|        |                                  |                                                                         |   |
|--------|----------------------------------|-------------------------------------------------------------------------|---|
| 140617 | Mycobacterium tuberculosis H37Rv | hypothetical protein                                                    | I |
| 140623 | Mycobacterium tuberculosis H37Rv | MCE-family protein MCE3A                                                | I |
| 140649 | Mycobacterium tuberculosis H37Rv | LOW MOLECULAR WEIGHT PROTEIN ANTIGEN 7 ESXH                             | I |
| 140652 | Mycobacterium tuberculosis H37Rv | LOW MOLECULAR WEIGHT PROTEIN ANTIGEN 7 ESXH                             | I |
| 140654 | Mycobacterium tuberculosis H37Rv | LOW MOLECULAR WEIGHT PROTEIN ANTIGEN 7 ESXH                             | I |
| 140706 | Mycobacterium tuberculosis H37Rv | LOW MOLECULAR WEIGHT PROTEIN ANTIGEN 7 ESXH                             | I |
| 140708 | Mycobacterium tuberculosis H37Rv | LOW MOLECULAR WEIGHT PROTEIN ANTIGEN 7 ESXH                             | I |
| 140712 | Mycobacterium tuberculosis H37Rv | LOW MOLECULAR WEIGHT PROTEIN ANTIGEN 7 ESXH                             | I |
| 140727 | Mycobacterium tuberculosis H37Rv | LOW MOLECULAR WEIGHT PROTEIN ANTIGEN 7 ESXH                             | I |
| 140744 | Mycobacterium tuberculosis H37Rv | LOW MOLECULAR WEIGHT PROTEIN ANTIGEN 7 ESXH                             | I |
| 140760 | Mycobacterium tuberculosis H37Rv | LOW MOLECULAR WEIGHT PROTEIN ANTIGEN 7 ESXH                             | I |
| 140769 | Mycobacterium tuberculosis H37Rv | LOW MOLECULAR WEIGHT PROTEIN ANTIGEN 7 ESXH                             | I |
| 141202 | Mycobacterium tuberculosis H37Rv | Uncharacterized PPE family protein PPE51                                | I |
| 142231 | Mycobacterium tuberculosis       | Lipoprotein lpqH precursor                                              | I |
| 142232 | Mycobacterium tuberculosis       | POSSIBLE CONSERVED TRANSMEMBRANE PROTEIN                                | I |
| 142233 | Mycobacterium tuberculosis       | ATP-dependent helicase                                                  | I |
| 144867 | Mycobacterium tuberculosis       | Putative transposase Rv3428c                                            | I |
| 144868 | Mycobacterium tuberculosis       | Uncharacterized glycosyl hydrolase Rv2006/MT2062                        | I |
| 144869 | Mycobacterium tuberculosis       | Uncharacterized protein Rv2074/MT2134                                   | I |
| 144876 | Mycobacterium tuberculosis       | Putative diacylglycerol O-acyltransferase Rv3087/MT3172                 | I |
| 144877 | Mycobacterium tuberculosis       | Hypothetical protein                                                    | I |
| 144882 | Mycobacterium tuberculosis       | Uncharacterized protein Rv2627c/MT2702                                  | I |
| 144883 | Mycobacterium tuberculosis       | transmembrane cation transporter                                        | I |
| 144884 | Mycobacterium tuberculosis       | Uncharacterized MFS-type transporter Rv0191/MT0201                      | I |
| 144886 | Mycobacterium tuberculosis       | PROBABLE TRANSPOSASE                                                    | I |
| 144887 | Mycobacterium tuberculosis       | 50S ribosomal protein L9                                                | I |
| 144890 | Mycobacterium tuberculosis       | AMP-binding family protein                                              | I |
| 144894 | Mycobacterium tuberculosis       | hypothetical protein                                                    | I |
| 144895 | Mycobacterium tuberculosis       | hypothetical protein                                                    | I |
| 144896 | Mycobacterium tuberculosis       | Probable nitrate/nitrite transporter narK2                              | I |
| 144897 | Mycobacterium tuberculosis       | Pyruvate kinase                                                         | I |
| 144905 | Mycobacterium tuberculosis       | Uncharacterized protein Rv2030c/MT2089                                  | I |
| 144908 | Mycobacterium tuberculosis       | MCE-FAMILY PROTEIN MCE1C                                                | I |
| 144909 | Mycobacterium tuberculosis       | Membrane transport protein mmpL8                                        | I |
| 144914 | Mycobacterium tuberculosis       | PROBABLE TRANSPOSASE                                                    | I |
| 144915 | Mycobacterium tuberculosis       | Uncharacterized protein Rv2075c/MT2135                                  | I |
| 144916 | Mycobacterium tuberculosis       | CONSERVED HYPOTHETICAL INTEGRAL MEMBRANE PROTEIN YRBE3B                 | I |
| 144917 | Mycobacterium tuberculosis       | Cell division protein ftsX homolog                                      | I |
| 144918 | Mycobacterium tuberculosis       | PROBABLE ENOYL-CoA HYDRATASE ECHA1                                      | I |
| 144922 | Mycobacterium tuberculosis       | Putative membrane protein mmpL3                                         | I |
| 144926 | Mycobacterium tuberculosis       | Putative diacylglycerol O-acyltransferase Rv0221/MT0231                 | I |
| 144928 | Mycobacterium tuberculosis       | Cold-shock DEAD box protein A homolog                                   | I |
| 144929 | Mycobacterium tuberculosis       | ESX-1 secretion system protein EccCb1                                   | I |
| 144930 | Mycobacterium tuberculosis       | Uncharacterized protein Rv0959/MT0986                                   | I |
| 144935 | Mycobacterium tuberculosis       | Putative maltotriose synthase                                           | I |
| 144936 | Mycobacterium tuberculosis       | Hypothetical protein                                                    | I |
| 144937 | Mycobacterium tuberculosis       | Uncharacterized protein Rv2004c/MT2060                                  | I |
| 144938 | Mycobacterium tuberculosis       | Hypothetical protein                                                    | I |
| 144939 | Mycobacterium tuberculosis       | Hypothetical protein                                                    | I |
| 144941 | Mycobacterium tuberculosis       | Hypothetical protein                                                    | I |
| 144942 | Mycobacterium tuberculosis       | PROBABLE OXIDOREDUCTASE                                                 | I |
| 144943 | Mycobacterium tuberculosis       | POSSIBLE TYPE I RESTRICTION/MODIFICATION SYSTEM SPECIFICITY DETERMINANT | I |
| 144944 | Mycobacterium tuberculosis       | Error-prone DNA polymerase                                              | I |
| 144945 | Mycobacterium tuberculosis       | PROBABLE CONSERVED TRANSMEMBRANE PROTEIN                                | I |
| 144947 | Mycobacterium tuberculosis       | Enoyl-                                                                  | I |
| 144948 | Mycobacterium tuberculosis       | Putative phenylalanine aminotransferase                                 | I |
| 144949 | Mycobacterium tuberculosis       | Phthiocerol synthesis polyketide synthase type I PpsB                   | I |
| 144950 | Mycobacterium tuberculosis       | POSSIBLE ALANINE RICH DEHYDROGENASE                                     | I |
| 144951 | Mycobacterium tuberculosis       | PROBABLE PROLINE DEHYDROGENASE                                          | I |
| 144953 | Mycobacterium tuberculosis       | Uncharacterized protein Rv0894/MT0918                                   | I |
| 144956 | Mycobacterium tuberculosis       | Bifunctional enzyme CysN/CysC                                           | I |
| 144957 | Mycobacterium tuberculosis       | Maf-like protein Rv3282/MT3381                                          | I |
| 144958 | Mycobacterium tuberculosis       | Uncharacterized protein Rv2030c/MT2089                                  | I |
| 144963 | Mycobacterium tuberculosis       | Probable membrane protein Rv1733c/MT1774                                | I |
| 144966 | Mycobacterium tuberculosis       | POSSIBLE CONSERVED MCE ASSOCIATED MEMBRANE PROTEIN                      | I |
| 144968 | Mycobacterium tuberculosis       | PROBABLE TRANSPOSASE                                                    | I |
| 144969 | Mycobacterium tuberculosis       | Hypothetical protein                                                    | I |
| 144970 | Mycobacterium tuberculosis       | Putative membrane protein mmpL3                                         | I |
| 144971 | Mycobacterium tuberculosis       | Probable methyltransferase                                              | I |
| 144972 | Mycobacterium tuberculosis       | PROBABLE LIPOPROTEIN AMINOPEPTIDASE LPQL                                | I |
| 144973 | Mycobacterium tuberculosis       | POSSIBLE TRANSCRIPTIONAL REGULATORY PROTEIN                             | I |
| 144975 | Mycobacterium tuberculosis       | Uncharacterized protein Rv1405c/MT1449                                  | I |
| 144976 | Mycobacterium tuberculosis       | Uncharacterized protein Rv1518/MT1568                                   | I |

|        |                                   |                                                           |    |
|--------|-----------------------------------|-----------------------------------------------------------|----|
| 144977 | Mycobacterium tuberculosis        | Uncharacterized protein Rv1813c/MT1861                    | I  |
| 144978 | Mycobacterium tuberculosis        | Uncharacterized protein Rv1734c/MT1774.1                  | I  |
| 144980 | Mycobacterium tuberculosis        | MCE-FAMILY PROTEIN MCE3B                                  | I  |
| 144981 | Mycobacterium tuberculosis        | PROBABLE SUCCINATE DEHYDROGENASE                          | I  |
| 144982 | Mycobacterium tuberculosis        | U00021                                                    | I  |
| 35     | Mycobacterium tuberculosis        | Phosphate-binding protein pstS 1 precursor                | II |
| 60     | Mycobacterium tuberculosis        | 6 kDa early secretory antigenic target                    | II |
| 93     | Mycobacterium bovis BCG           | secreted antigen 85-B fbpB                                | II |
| 153    | Mycobacterium bovis BCG           | SECRETED ANTIGEN 85-B FBPB                                | II |
| 183    | Mycobacterium tuberculosis        | PPE FAMILY PROTEIN                                        | II |
| 189    | Mycobacterium tuberculosis H37Rv  | 10 KDA CULTURE FILTRATE ANTIGEN ESXB (LHP) (CFP10)        | II |
| 191    | Mycobacterium tuberculosis        | PPE FAMILY PROTEIN                                        | II |
| 222    | Mycobacterium bovis BCG           | secreted antigen 85-B fbpB                                | II |
| 224    | Mycobacterium bovis AN5           | protein or antigen 85-B                                   | II |
| 327    | Mycobacterium tuberculosis        | 10 kDa culture filtrate antigen EsxB                      | II |
| 328    | Mycobacterium tuberculosis H37Rv  | ESAT-6-like protein esxB                                  | II |
| 433    | Mycobacterium tuberculosis        | 19 KDA LIPOPROTEIN ANTIGEN PRECURSOR LPQH                 | II |
| 439    | Mycobacterium tuberculosis H37Rv  | ESAT-6-like protein esxN                                  | II |
| 459    | Mycobacterium tuberculosis        | Lipoprotein lpqH precursor                                | II |
| 502    | Mycobacterium bovis BCG           | secreted antigen 85-B fbpB                                | II |
| 506    | Mycobacterium tuberculosis        | ESAT-6-like protein esxB                                  | II |
| 511    | Mycobacterium tuberculosis        | 6 kDa early secretory antigenic target                    | II |
| 528    | Mycobacterium bovis BCG           | secreted antigen 85-B fbpB                                | II |
| 529    | Mycobacterium bovis BCG           | Antigen 85-B precursor                                    | II |
| 556    | Mycobacterium bovis BCG           | secreted antigen 85-B fbpB                                | II |
| 726    | Mycobacterium tuberculosis H37Rv  | MCE-FAMILY PROTEIN MCE2A                                  | II |
| 904    | Mycobacterium bovis BCG           | secreted antigen 85-B fbpB                                | II |
| 905    | Mycobacterium bovis BCG           | Antigen 85-B precursor                                    | II |
| 965    | Mycobacterium tuberculosis H37Rv  | PUTATIVE ESAT-6 LIKE PROTEIN ESXL (ESAT-6 LIKE PROTEIN 4) | II |
| 966    | Mycobacterium tuberculosis Erdman | antigen Mtb9.9B                                           | II |
| 967    | Mycobacterium tuberculosis H37Rv  | ESAT-6-like protein esxN                                  | II |
| 1197   | Mycobacterium tuberculosis        | Phosphate-binding protein pstS 1 precursor                | II |
| 1473   | Mycobacterium tuberculosis        | 60 KDA CHAPERONIN 2 GROEL2                                | II |
| 1525   | Mycobacterium tuberculosis        | 60 KDA CHAPERONIN 2 GROEL2                                | II |
| 1539   | Mycobacterium tuberculosis        | 60 KDA CHAPERONIN 2 GROEL2                                | II |
| 1544   | Mycobacterium bovis BCG           | SECRETED ANTIGEN 85-B FBPB                                | II |
| 1545   | Mycobacterium tuberculosis        | Antigen 85-B                                              | II |
| 1546   | Mycobacterium tuberculosis        | Antigen 85-A precursor                                    | II |
| 1549   | Mycobacterium tuberculosis        | 60 KDA CHAPERONIN 2 GROEL2                                | II |
| 1581   | Mycobacterium tuberculosis        | 60 kDa chaperonin 2                                       | II |
| 1600   | Mycobacterium tuberculosis H37Rv  | PUTATIVE ESAT-6 LIKE PROTEIN ESXL (ESAT-6 LIKE PROTEIN 4) | II |
| 1601   | Mycobacterium tuberculosis Erdman | antigen Mtb9.9B                                           | II |
| 1629   | Mycobacterium tuberculosis        | Lipoprotein lpqH precursor                                | II |
| 1674   | Mycobacterium tuberculosis        | 60 KDA CHAPERONIN 2 GROEL2                                | II |
| 1682   | Mycobacterium bovis BCG           | secreted antigen 85-B fbpB                                | II |
| 2007   | Mycobacterium tuberculosis        | 60 KDA CHAPERONIN 2 GROEL2                                | II |
| 2048   | Mycobacterium tuberculosis        | Immunogenic protein MPT64 precursor                       | II |
| 2145   | Mycobacterium bovis               | 60 KDA CHAPERONIN 2 GROEL2                                | II |
| 2434   | Mycobacterium tuberculosis        | PPE FAMILY PROTEIN                                        | II |
| 2694   | Mycobacterium bovis BCG           | Secreted antigen Ag85B                                    | II |
| 2695   | Mycobacterium tuberculosis        | Antigen 85-B                                              | II |
| 2879   | Mycobacterium bovis BCG           | Immunogenic protein MPB70 precursor                       | II |
| 2922   | Mycobacterium tuberculosis        | PPE FAMILY PROTEIN                                        | II |
| 3081   | Mycobacterium tuberculosis        | ESAT-6-like protein esxH                                  | II |
| 3196   | Mycobacterium tuberculosis H37Rv  | ESAT-6-like protein esxH                                  | II |
| 3248   | Mycobacterium tuberculosis        | 10 kDa chaperonin                                         | II |
| 3399   | Mycobacterium bovis BCG           | SECRETED ANTIGEN 85-B FBPB                                | II |
| 3400   | Mycobacterium tuberculosis        | Antigen 85-B                                              | II |
| 3403   | Mycobacterium tuberculosis        | Antigen 85-A precursor                                    | II |
| 3422   | Mycobacterium tuberculosis        | Antigen 85-A precursor                                    | II |
| 3505   | Mycobacterium tuberculosis        | Phosphate-binding protein pstS 1 precursor                | II |
| 3629   | Mycobacterium tuberculosis        | Immunogenic protein MPT64 precursor                       | II |
| 3865   | Mycobacterium tuberculosis        | 60 KDA CHAPERONIN 2 GROEL2                                | II |
| 3935   | Mycobacterium tuberculosis        | 10 kDa culture filtrate antigen EsxB                      | II |
| 4132   | Mycobacterium tuberculosis        | 10 kDa chaperonin                                         | II |
| 4187   | Mycobacterium tuberculosis        | PPE FAMILY PROTEIN                                        | II |
| 4334   | Mycobacterium tuberculosis        | Lipoprotein lpqH precursor                                | II |
| 4426   | Mycobacterium tuberculosis        | 10 kDa chaperonin                                         | II |
| 4556   | Mycobacterium tuberculosis        | mtp40 protein - Mycobacterium tuberculosis                | II |
| 4727   | Mycobacterium tuberculosis        | PPE FAMILY PROTEIN                                        | II |
| 4871   | Mycobacterium bovis BCG           | secreted antigen 85-B fbpB                                | II |
| 4942   | Mycobacterium tuberculosis        | 6 kDa early secretory antigenic target                    | II |
| 4990   | Mycobacterium tuberculosis        | 19 KDA LIPOPROTEIN ANTIGEN PRECURSOR LPQH                 | II |

|       |                                             |                                            |    |
|-------|---------------------------------------------|--------------------------------------------|----|
| 5063  | Mycobacterium tuberculosis                  | PPE FAMILY PROTEIN                         | II |
| 5196  | Mycobacterium tuberculosis                  | 60 kDa chaperonin 2                        | II |
| 5245  | Mycobacterium bovis BCG                     | Immunogenic protein MPB70 precursor        | II |
| 5422  | Mycobacterium tuberculosis                  | 60 kDa chaperonin 2                        | II |
| 5661  | Mycobacterium tuberculosis                  | 6 kDa early secretory antigenic target     | II |
| 6322  | Mycobacterium bovis BCG                     | secreted antigen 85-B fbpB                 | II |
| 6323  | Mycobacterium tuberculosis                  | Antigen 85-B                               | II |
| 6348  | Mycobacterium tuberculosis                  | Phosphate-binding protein pstS 1 precursor | II |
| 7470  | Mycobacterium tuberculosis                  | Phosphate-binding protein pstS 1 precursor | II |
| 7472  | Mycobacterium tuberculosis                  | Phosphate-binding protein pstS 1 precursor | II |
| 7529  | Mycobacterium tuberculosis Erdman           | antigen Mtb9.9B                            | II |
| 7530  | Mycobacterium tuberculosis H37Rv            | ESAT-6-like protein esxN                   | II |
| 7531  | Mycobacterium tuberculosis H37Rv            | Putative ESAT-6-like protein 6             | II |
| 7703  | Mycobacterium tuberculosis H37Rv            | ESAT-6-like protein esxQ                   | II |
| 7799  | Mycobacterium tuberculosis                  | 14 kDa antigen                             | II |
| 7879  | Mycobacterium tuberculosis                  | 60 KDA CHAPERONIN 2 GROEL2                 | II |
| 7893  | Mycobacterium bovis BCG                     | secreted antigen 85-B fbpB                 | II |
| 7894  | Mycobacterium bovis BCG                     | Antigen 85-B precursor                     | II |
| 8411  | Mycobacterium tuberculosis                  | Putative lipoprotein lppX precursor        | II |
| 8464  | Mycobacterium tuberculosis                  | Lipoprotein lpqH precursor                 | II |
| 8590  | Mycobacterium tuberculosis H37Rv            | ESAT-6-like protein esxR                   | II |
| 8591  | Mycobacterium tuberculosis H37Rv            | ESAT-6-like protein esxQ                   | II |
| 8686  | Mycobacterium tuberculosis                  | Antigen 85-A precursor                     | II |
| 8687  | Mycobacterium bovis BCG                     | SECRETED ANTIGEN 85-B FBPB                 | II |
| 8688  | Mycobacterium tuberculosis                  | Antigen 85-B                               | II |
| 9352  | Mycobacterium tuberculosis                  | Lipoprotein lpqH precursor                 | II |
| 9474  | Mycobacterium tuberculosis H37Rv            | PPE FAMILY PROTEIN                         | II |
| 9475  | Mycobacterium tuberculosis H37Rv            | PPE FAMILY PROTEIN                         | II |
| 9613  | Mycobacterium tuberculosis                  | 14 kDa antigen                             | II |
| 9649  | Mycobacterium tuberculosis H37Rv            | MCE-FAMILY PROTEIN MCE2A                   | II |
| 9923  | Mycobacterium tuberculosis                  | Phosphate-binding protein pstS 1 precursor | II |
| 9924  | Mycobacterium tuberculosis                  | Phosphate-binding protein pstS 1 precursor | II |
| 10022 | Mycobacterium tuberculosis H37Rv            | PPE FAMILY PROTEIN                         | II |
| 10043 | Mycobacterium bovis                         | 60 KDA CHAPERONIN 2 GROEL2                 | II |
| 10533 | Mycobacterium bovis BCG str. Pasteur 1173P2 | PPE family protein                         | II |
| 10571 | Mycobacterium bovis                         | 60 KDA CHAPERONIN 2 GROEL2                 | II |
| 10838 | Mycobacterium tuberculosis                  | Antigen 85-A precursor                     | II |
| 10840 | Mycobacterium bovis BCG                     | Antigen 85-B precursor                     | II |
| 10842 | Mycobacterium bovis                         | alpha-antigen                              | II |
| 10984 | Mycobacterium tuberculosis                  | 6 kDa early secretory antigenic target     | II |
| 11937 | Mycobacterium bovis BCG                     | 10 kDa chaperonin                          | II |
| 12151 | Mycobacterium tuberculosis                  | 10 kDa chaperonin                          | II |
| 12206 | Mycobacterium tuberculosis                  | 6 kDa early secretory antigenic target     | II |
| 12207 | Mycobacterium tuberculosis H37Rv            | 6 kDa early secretory antigenic target     | II |
| 12311 | Mycobacterium tuberculosis H37Rv            | MCE-FAMILY PROTEIN MCE2A                   | II |
| 12366 | Mycobacterium tuberculosis                  | Lipoprotein lpqH                           | II |
| 12402 | Mycobacterium tuberculosis                  | ESAT-6-like protein esxH                   | II |
| 12583 | Mycobacterium tuberculosis H37Rv            | ESAT-6-like protein esxB                   | II |
| 12585 | Mycobacterium tuberculosis H37Rv            | 10 kDa culture filtrate antigen EsxB       | II |
| 13836 | Mycobacterium tuberculosis                  | Putative lipoprotein lppX precursor        | II |
| 13839 | Mycobacterium tuberculosis                  | 60 KDA CHAPERONIN 2 GROEL2                 | II |
| 14574 | Mycobacterium tuberculosis                  | 10 kDa chaperonin                          | II |
| 15116 | Mycobacterium tuberculosis                  | Antigen 85-B precursor                     | II |
| 15177 | Mycobacterium tuberculosis                  | 6 kDa early secretory antigenic target     | II |
| 15309 | Mycobacterium tuberculosis                  | HEAT SHOCK PROTEIN HSPX                    | II |
| 15812 | Mycobacterium tuberculosis                  | PPE FAMILY PROTEIN                         | II |
| 16334 | Mycobacterium bovis BCG                     | alpha-antigen                              | II |
| 16926 | Mycobacterium bovis BCG                     | Antigen 85-B precursor                     | II |
| 17199 | Mycobacterium tuberculosis                  | Phosphate-binding protein pstS 1 precursor | II |
| 17348 | Mycobacterium bovis BCG                     | secreted antigen 85-B fbpB                 | II |
| 17532 | Mycobacterium bovis BCG                     | secreted antigen 85-B fbpB                 | II |
| 17759 | Mycobacterium bovis BCG                     | Immunogenic protein MPB70 precursor        | II |
| 17833 | Mycobacterium bovis BCG                     | secreted antigen 85-B fbpB                 | II |
| 17836 | Mycobacterium bovis BCG                     | Antigen 85-B precursor                     | II |
| 17838 | Mycobacterium tuberculosis                  | Antigen 85-A precursor                     | II |
| 18344 | Mycobacterium tuberculosis Erdman           | ESAT-6-like protein esxI                   | II |
| 18345 | Mycobacterium tuberculosis H37Rv            | ESAT-6-like protein esxN                   | II |
| 18509 | Mycobacterium tuberculosis                  | Lipoprotein lpqH precursor                 | II |
| 18526 | Mycobacterium tuberculosis                  | Lipoprotein lpqH precursor                 | II |
| 18685 | Mycobacterium tuberculosis                  | PPE FAMILY PROTEIN                         | II |
| 18699 | Mycobacterium bovis BCG                     | secreted antigen 85-B fbpB                 | II |
| 18700 | Mycobacterium tuberculosis                  | Antigen 85-B                               | II |
| 18781 | Mycobacterium bovis BCG                     | Immunogenic protein MPB70 precursor        | II |

|       |                                   |                                                           |    |
|-------|-----------------------------------|-----------------------------------------------------------|----|
| 18896 | Mycobacterium tuberculosis        | Antigen 85-A precursor                                    | II |
| 18897 | Mycobacterium bovis BCG           | Antigen 85-B precursor                                    | II |
| 18899 | Mycobacterium bovis BCG           | secreted antigen 85-B fbpB                                | II |
| 18900 | Mycobacterium bovis               | alpha-antigen                                             | II |
| 18901 | Mycobacterium bovis               | alpha-antigen                                             | II |
| 18914 | Mycobacterium tuberculosis        | Lipoprotein lpqH precursor                                | II |
| 18959 | Mycobacterium tuberculosis        | 60 KDA CHAPERONIN 2 GROEL2                                | II |
| 19050 | Mycobacterium bovis BCG           | Immunogenic protein MPB70 precursor                       | II |
| 19282 | Mycobacterium bovis               | PE-PGRS FAMILY PROTEIN                                    | II |
| 19348 | Mycobacterium tuberculosis        | IMMUNOGENIC PROTEIN MPT64 (ANTIGEN MPT64/MPB64)           | II |
| 19359 | Mycobacterium tuberculosis        | IMMUNOGENIC PROTEIN MPT64 (ANTIGEN MPT64/MPB64)           | II |
| 19646 | Mycobacterium tuberculosis        | Antigen 85-A precursor                                    | II |
| 19860 | Mycobacterium tuberculosis        | PPE FAMILY PROTEIN                                        | II |
| 19989 | Mycobacterium bovis BCG           | Antigen 85-B precursor                                    | II |
| 20101 | Mycobacterium bovis BCG           | Antigen 85-B precursor                                    | II |
| 20242 | Mycobacterium tuberculosis        | 6 kDa early secretory antigenic target                    | II |
| 20281 | Mycobacterium tuberculosis H37Rv  | PPE FAMILY PROTEIN                                        | II |
| 20662 | Mycobacterium tuberculosis        | 14 kDa antigen                                            | II |
| 20670 | Mycobacterium tuberculosis        | 6 kDa early secretory antigenic target                    | II |
| 20707 | Mycobacterium tuberculosis H37Rv  | MCE-FAMILY PROTEIN MCE4C                                  | II |
| 20744 | Mycobacterium bovis BCG           | Immunogenic protein MPB70 precursor                       | II |
| 20820 | Mycobacterium sp.                 | 60 KDA CHAPERONIN 2 GROEL2                                | II |
| 20821 | Mycobacterium tuberculosis        | 60 kDa chaperonin 2                                       | II |
| 20890 | Mycobacterium tuberculosis        | Lipoprotein lpqH precursor                                | II |
| 20979 | Mycobacterium tuberculosis        | Antigen 85-A precursor                                    | II |
| 20997 | Mycobacterium tuberculosis        | PPE FAMILY PROTEIN                                        | II |
| 21093 | Mycobacterium tuberculosis        | Antigen 85-A precursor                                    | II |
| 21094 | Mycobacterium bovis BCG           | secreted antigen 85-B fbpB                                | II |
| 21096 | Mycobacterium tuberculosis        | Antigen 85-B                                              | II |
| 21179 | Mycobacterium tuberculosis        | PPE FAMILY PROTEIN                                        | II |
| 21371 | Mycobacterium bovis BCG           | Immunogenic protein MPB70 precursor                       | II |
| 21423 | Mycobacterium tuberculosis H37Rv  | ESAT-6-like protein esxB                                  | II |
| 21434 | Mycobacterium tuberculosis        | Phosphate-binding protein pstS 1 precursor                | II |
| 21439 | Mycobacterium tuberculosis        | Antigen 85-A precursor                                    | II |
| 21482 | Mycobacterium tuberculosis        | Antigen 85-A precursor                                    | II |
| 21483 | Mycobacterium tuberculosis H37Rv  | ESAT-6-like protein esxN                                  | II |
| 21497 | Mycobacterium tuberculosis H37Rv  | PPE FAMILY PROTEIN                                        | II |
| 21670 | Mycobacterium tuberculosis        | Antigen 85-A precursor                                    | II |
| 21765 | Mycobacterium tuberculosis        | mtp40 protein - Mycobacterium tuberculosis                | II |
| 21773 | Mycobacterium tuberculosis        | Uncharacterized transporter Rv1979c/MT2031                | II |
| 21795 | Mycobacterium bovis BCG           | secreted antigen 85-B fbpB                                | II |
| 21796 | Mycobacterium bovis BCG           | Antigen 85-B precursor                                    | II |
| 21797 | Mycobacterium tuberculosis        | Antigen 85-B                                              | II |
| 21976 | Mycobacterium tuberculosis        | 10 kDa culture filtrate antigen EsxB                      | II |
| 22008 | Mycobacterium bovis BCG           | Antigen 85-B precursor                                    | II |
| 22252 | Mycobacterium tuberculosis        | 10 kDa chaperonin                                         | II |
| 22266 | Mycobacterium tuberculosis Erdman | ESAT-6-like protein esxI                                  | II |
| 22323 | Mycobacterium tuberculosis        | mtp40 protein - Mycobacterium tuberculosis                | II |
| 22351 | Mycobacterium tuberculosis        | PPE FAMILY PROTEIN                                        | II |
| 22531 | Mycobacterium tuberculosis        | PPE FAMILY PROTEIN                                        | II |
| 22554 | Mycobacterium tuberculosis H37Rv  | ESAT-6-like protein esxN                                  | II |
| 22633 | Mycobacterium tuberculosis        | Immunogenic protein MPT64 precursor                       | II |
| 22657 | Mycobacterium tuberculosis        | PPE FAMILY PROTEIN                                        | II |
| 22882 | Mycobacterium leprae              | 10 kDa chaperonin                                         | II |
| 22884 | Mycobacterium tuberculosis        | 10 kDa chaperonin                                         | II |
| 23155 | Mycobacterium tuberculosis        | Immunogenic protein MPT70 precursor                       | II |
| 23487 | Mycobacterium tuberculosis        | Lipoprotein lpqH precursor                                | II |
| 23735 | Mycobacterium tuberculosis        | Phosphate-binding protein pstS 1 precursor                | II |
| 23837 | Mycobacterium tuberculosis        | Phosphate-binding protein pstS 1 precursor                | II |
| 24522 | Mycobacterium tuberculosis        | IMMUNOGENIC PROTEIN MPT64 (ANTIGEN MPT64/MPB64)           | II |
| 24876 | Mycobacterium bovis BCG           | Antigen 85-B precursor                                    | II |
| 25269 | Mycobacterium tuberculosis        | 60 KDA CHAPERONIN 2 GROEL2                                | II |
| 25315 | Mycobacterium tuberculosis        | 19 KDA LIPOPROTEIN ANTIGEN PRECURSOR LPQH                 | II |
| 25363 | Mycobacterium tuberculosis        | Antigen 85-A precursor                                    | II |
| 25561 | Mycobacterium tuberculosis        | Immunogenic protein MPT70 precursor                       | II |
| 25716 | Mycobacterium tuberculosis        | 6 kDa early secretory antigenic target                    | II |
| 26269 | Mycobacterium tuberculosis        | Antigen 85-B precursor                                    | II |
| 26654 | Mycobacterium tuberculosis H37Rv  | PUTATIVE ESAT-6 LIKE PROTEIN ESXL (ESAT-6 LIKE PROTEIN 4) | II |
| 26672 | Mycobacterium tuberculosis Erdman | ESAT-6-like protein esxI                                  | II |
| 26805 | Mycobacterium tuberculosis        | Immunogenic protein MPT64 precursor                       | II |
| 26949 | Mycobacterium bovis BCG           | alpha-antigen                                             | II |
| 27389 | Mycobacterium tuberculosis        | 14 kDa antigen                                            | II |
| 27635 | Mycobacterium tuberculosis        | mtp40 protein - Mycobacterium tuberculosis                | II |

|       |                                   |                                                    |    |
|-------|-----------------------------------|----------------------------------------------------|----|
| 27981 | Mycobacterium tuberculosis        | Immunogenic protein MPT64 precursor                | II |
| 28304 | Mycobacterium tuberculosis        | IMMUNOGENIC PROTEIN MPT63                          | II |
| 28327 | Mycobacterium tuberculosis        | Phosphate-binding protein pstS 1 precursor         | II |
| 28364 | Mycobacterium tuberculosis        | ESAT-6-like protein esxB                           | II |
| 28367 | Mycobacterium tuberculosis H37Rv  | ESAT-6-like protein esxB                           | II |
| 28470 | Mycobacterium tuberculosis H37Rv  | 6 kDa early secretory antigenic target             | II |
| 28506 | Mycobacterium tuberculosis        | 10 kDa culture filtrate antigen EsxB               | II |
| 28594 | Mycobacterium tuberculosis        | Immunogenic protein MPT64 precursor                | II |
| 29256 | Mycobacterium tuberculosis        | Uncharacterized transporter Rv1979c/MT2031         | II |
| 29423 | Mycobacterium tuberculosis H37Rv  | ESAT-6-like protein esxN                           | II |
| 29574 | Mycobacterium tuberculosis H37Rv  | ESAT-6-like protein esxN                           | II |
| 31342 | Mycobacterium bovis T/91/1378     | 10 kDa chaperonin                                  | II |
| 31443 | Mycobacterium tuberculosis        | Lipoprotein lpqH precursor                         | II |
| 31838 | Mycobacterium tuberculosis        | Putative lipoprotein lppX precursor                | II |
| 32215 | Mycobacterium bovis BCG           | Antigen 85-B precursor                             | II |
| 32668 | Mycobacterium tuberculosis        | Putative lipoprotein lppX precursor                | II |
| 32692 | Mycobacterium tuberculosis        | 60 kDa chaperonin 2                                | II |
| 32898 | Mycobacterium bovis BCG           | secreted antigen 85-B fbpB                         | II |
| 33162 | Mycobacterium tuberculosis        | 10 kDa chaperonin                                  | II |
| 33402 | Mycobacterium tuberculosis        | IMMUNOGENIC PROTEIN MPT64 (ANTIGEN MPT64/MPB64)    | II |
| 33707 | Mycobacterium leprae              | 60 kDa chaperonin 2                                | II |
| 33951 | Mycobacterium tuberculosis        | 60 kDa chaperonin 2                                | II |
| 33972 | Mycobacterium tuberculosis        | Putative lipoprotein lppX precursor                | II |
| 34174 | Mycobacterium tuberculosis H37Rv  | ESAT-6-like protein esxN                           | II |
| 34232 | Mycobacterium tuberculosis        | Lipoprotein lpqH precursor                         | II |
| 34293 | Mycobacterium bovis BCG           | secreted antigen 85-B fbpB                         | II |
| 34437 | Mycobacterium tuberculosis        | 10 kDa chaperonin                                  | II |
| 34667 | Mycobacterium tuberculosis H37Rv  | ESAT-6-like protein esxN                           | II |
| 34775 | Mycobacterium bovis BCG           | SECRETED ANTIGEN 85-B FBPB                         | II |
| 34823 | Mycobacterium tuberculosis        | Secreted antigen Ag85A                             | II |
| 34873 | Mycobacterium bovis BCG           | secreted antigen 85-B fbpB                         | II |
| 34928 | Mycobacterium tuberculosis        | 10 kDa culture filtrate antigen EsxB               | II |
| 34949 | Mycobacterium tuberculosis        | 6 kDa early secretory antigenic target             | II |
| 35139 | Mycobacterium tuberculosis        | 6 kDa early secretory antigenic target             | II |
| 35140 | Mycobacterium tuberculosis H37Rv  | ESAT-6-like protein esxB                           | II |
| 35316 | Mycobacterium tuberculosis        | 10 kDa chaperonin                                  | II |
| 35391 | Mycobacterium tuberculosis        | 10 kDa chaperonin                                  | II |
| 35403 | Mycobacterium tuberculosis        | 60 KDA CHAPERONIN 2 GROEL2                         | II |
| 35437 | Mycobacterium tuberculosis        | PPE FAMILY PROTEIN                                 | II |
| 35740 | Mycobacterium tuberculosis        | PPE family protein                                 | II |
| 35787 | Mycobacterium tuberculosis        | 14 kDa antigen                                     | II |
| 35819 | Mycobacterium tuberculosis        | PPE FAMILY PROTEIN                                 | II |
| 36046 | Mycobacterium tuberculosis        | Putative lipoprotein lppX precursor                | II |
| 36536 | Mycobacterium bovis BCG           | Antigen 85-B precursor                             | II |
| 37041 | Mycobacterium tuberculosis H37Rv  | 10 kDa culture filtrate antigen EsxB               | II |
| 37059 | Mycobacterium tuberculosis        | Immunogenic protein MPT64 precursor                | II |
| 37154 | Mycobacterium tuberculosis        | PPE FAMILY PROTEIN                                 | II |
| 37173 | Mycobacterium bovis BCG           | alpha-antigen                                      | II |
| 37668 | Mycobacterium tuberculosis        | 60 kDa chaperonin 2                                | II |
| 37874 | Mycobacterium bovis BCG           | alpha-antigen                                      | II |
| 37930 | Mycobacterium tuberculosis        | 60 kDa chaperonin 2                                | II |
| 38059 | Mycobacterium sp. JLS             | Cell divisionFtsK/SpoIIIE precursor                | II |
| 38169 | Mycobacterium bovis BCG           | Antigen 85-B precursor                             | II |
| 38334 | Mycobacterium bovis BCG           | Immunogenic protein MPB70 precursor                | II |
| 38492 | Mycobacterium tuberculosis        | PPE FAMILY PROTEIN                                 | II |
| 38749 | Mycobacterium bovis BCG           | SECRETED ANTIGEN 85-B FBPB                         | II |
| 38916 | Mycobacterium tuberculosis        | 60 KDA CHAPERONIN 2 GROEL2                         | II |
| 39010 | Mycobacterium bovis BCG           | secreted antigen 85-B fbpB                         | II |
| 39011 | Mycobacterium tuberculosis        | Antigen 85-A precursor                             | II |
| 39169 | Mycobacterium tuberculosis        | 14 kDa antigen                                     | II |
| 39170 | Mycobacterium tuberculosis        | 14 kDa antigen                                     | II |
| 39281 | Mycobacterium bovis BCG           | Antigen 85-B precursor                             | II |
| 39282 | Mycobacterium bovis               | Antigen 85-B                                       | II |
| 39354 | Mycobacterium tuberculosis H37Rv  | PPE FAMILY PROTEIN                                 | II |
| 39408 | Mycobacterium tuberculosis        | Putative lipoprotein lppX precursor                | II |
| 39449 | Mycobacterium bovis BCG           | SECRETED ANTIGEN 85-B FBPB                         | II |
| 39498 | Mycobacterium bovis BCG           | alpha-antigen                                      | II |
| 39813 | Mycobacterium tuberculosis Erdman | ESAT-6-like protein esxI                           | II |
| 40162 | Mycobacterium tuberculosis        | Antigen 85-A precursor                             | II |
| 40164 | Mycobacterium bovis BCG           | secreted antigen 85-B fbpB                         | II |
| 40165 | Mycobacterium tuberculosis        | Antigen 85-B                                       | II |
| 41001 | Mycobacterium tuberculosis        | Phosphate-binding protein pstS 1 precursor         | II |
| 41030 | Mycobacterium tuberculosis        | 10 KDA CULTURE FILTRATE ANTIGEN ESXB (LHP) (CFP10) | II |

|       |                                   |                                                      |    |
|-------|-----------------------------------|------------------------------------------------------|----|
| 41031 | Mycobacterium tuberculosis H37Rv  | 10 KDA CULTURE FILTRATE ANTIGEN ESXB (LHP) (CFP10)   | II |
| 41060 | Mycobacterium tuberculosis        | 60 KDA CHAPERONIN 2 GROEL2                           | II |
| 41064 | Mycobacterium tuberculosis        | 60 KDA CHAPERONIN 2 GROEL2                           | II |
| 41068 | Mycobacterium tuberculosis        | 60 KDA CHAPERONIN 2 GROEL2                           | II |
| 41088 | Mycobacterium bovis               | ESAT-6-like protein esxR                             | II |
| 41089 | Mycobacterium tuberculosis        | ESAT-6-like protein esxH                             | II |
| 41099 | Mycobacterium tuberculosis        | Lipoprotein lpqH precursor                           | II |
| 41161 | Mycobacterium tuberculosis        | 14 kDa antigen                                       | II |
| 41708 | Mycobacterium bovis BCG           | SECRETED ANTIGEN 85-B FBPB                           | II |
| 41764 | Mycobacterium tuberculosis Erdman | antigen Mtb9.9B                                      | II |
| 41765 | Mycobacterium tuberculosis H37Rv  | ESAT-6-like protein esxN                             | II |
| 41766 | Mycobacterium tuberculosis H37Rv  | Putative ESAT-6-like protein 6                       | II |
| 41840 | Mycobacterium tuberculosis        | Phosphate-binding protein pstS 1 precursor           | II |
| 41872 | Mycobacterium tuberculosis        | Antigen 85-A precursor                               | II |
| 41889 | Mycobacterium bovis BCG           | Immunogenic protein MPB70 precursor                  | II |
| 41943 | Mycobacterium tuberculosis        | ESAT-6-like protein esxH                             | II |
| 41948 | Mycobacterium tuberculosis        | mtp40 protein - Mycobacterium tuberculosis           | II |
| 41952 | Mycobacterium tuberculosis        | mtp40 protein - Mycobacterium tuberculosis           | II |
| 42102 | Mycobacterium tuberculosis H37Rv  | ESAT-6-like protein esxR                             | II |
| 42195 | Mycobacterium tuberculosis        | Putative lipoprotein lppX precursor                  | II |
| 42633 | Mycobacterium tuberculosis        | 19 KDA LIPOPROTEIN ANTIGEN PRECURSOR LPQH            | II |
| 42638 | Mycobacterium bovis               | ESAT-6-like protein esxH                             | II |
| 42640 | Mycobacterium tuberculosis H37Rv  | ESAT-6-like protein esxR                             | II |
| 42642 | Mycobacterium tuberculosis H37Rv  | ESAT-6-like protein esxQ                             | II |
| 42739 | Mycobacterium tuberculosis H37Rv  | ESAT-6-like protein esxQ                             | II |
| 42789 | Mycobacterium bovis BCG           | SECRETED ANTIGEN 85-B FBPB                           | II |
| 42795 | Mycobacterium bovis               | 6 kDa early secretory antigenic target               | II |
| 42797 | Mycobacterium tuberculosis        | 6 kDa early secretory antigenic target               | II |
| 42798 | Mycobacterium tuberculosis H37Rv  | 6 kDa early secretory antigenic target               | II |
| 42814 | Mycobacterium tuberculosis H37Rv  | ESAT-6-like protein esxN                             | II |
| 43166 | Mycobacterium tuberculosis H37Rv  | ESAT-6-like protein esxN                             | II |
| 43210 | Mycobacterium tuberculosis H37Rv  | 6 kDa early secretory antigenic target ESXA (ESAT-6) | II |
| 43331 | Mycobacterium bovis BCG           | secreted antigen 85-B fbpB                           | II |
| 43332 | Mycobacterium tuberculosis        | Antigen 85-B                                         | II |
| 43447 | Mycobacterium tuberculosis        | Immunogenic protein MPT64 precursor                  | II |
| 43504 | Mycobacterium tuberculosis        | Antigen 85-A precursor                               | II |
| 43513 | Mycobacterium bovis BCG           | secreted antigen 85-B fbpB                           | II |
| 43514 | Mycobacterium tuberculosis        | Antigen 85-B                                         | II |
| 43670 | Mycobacterium bovis BCG           | Antigen 85-B precursor                               | II |
| 43881 | Mycobacterium tuberculosis        | Phosphate-binding protein pstS 1 precursor           | II |
| 43948 | Mycobacterium bovis BCG           | alpha-antigen                                        | II |
| 43949 | Mycobacterium bovis AN5           | alpha-antigen                                        | II |
| 44020 | Mycobacterium tuberculosis        | Phosphate-binding protein pstS 1 precursor           | II |
| 44100 | Mycobacterium tuberculosis        | Antigen 85-A precursor                               | II |
| 44231 | Mycobacterium tuberculosis H37Rv  | PPE FAMILY PROTEIN                                   | II |
| 44381 | Mycobacterium tuberculosis        | Immunogenic protein MPT64 precursor                  | II |
| 44653 | Mycobacterium tuberculosis        | 6 kDa early secretory antigenic target               | II |
| 45249 | Mycobacterium bovis BCG           | secreted antigen 85-B fbpB                           | II |
| 45250 | Mycobacterium tuberculosis        | Antigen 85-B                                         | II |
| 46500 | Mycobacterium tuberculosis        | 6 kDa early secretory antigenic target               | II |
| 46501 | Mycobacterium tuberculosis        | 6 kDa early secretory antigenic target               | II |
| 46788 | Mycobacterium bovis BCG           | secreted antigen 85-B fbpB                           | II |
| 47002 | Mycobacterium bovis BCG           | SECRETED ANTIGEN 85-B FBPB                           | II |
| 47702 | Mycobacterium bovis BCG           | secreted antigen 85-B fbpB                           | II |
| 48458 | Mycobacterium tuberculosis        | Immunogenic protein MPT64 precursor                  | II |
| 48624 | Mycobacterium bovis BCG           | SECRETED ANTIGEN 85-B FBPB                           | II |
| 49152 | Mycobacterium bovis BCG           | secreted antigen 85-B fbpB                           | II |
| 49254 | Mycobacterium tuberculosis        | 14 kDa antigen                                       | II |
| 49280 | Mycobacterium tuberculosis H37Rv  | MCE-FAMILY PROTEIN MCE2A                             | II |
| 49420 | Mycobacterium bovis BCG           | secreted antigen 85-B fbpB                           | II |
| 49421 | Mycobacterium tuberculosis        | Antigen 85-B precursor                               | II |
| 49440 | Mycobacterium bovis BCG           | secreted antigen 85-B fbpB                           | II |
| 49635 | Mycobacterium bovis BCG           | Immunogenic protein MPB70 precursor                  | II |
| 49699 | Mycobacterium tuberculosis        | Antigen 85-A precursor                               | II |
| 49862 | Mycobacterium tuberculosis        | Secreted antigen Ag85A                               | II |
| 49870 | Mycobacterium tuberculosis        | Antigen 85-A precursor                               | II |
| 49871 | Mycobacterium bovis BCG           | secreted antigen 85-B fbpB                           | II |
| 49872 | Mycobacterium tuberculosis        | Antigen 85-B                                         | II |
| 49925 | Mycobacterium tuberculosis        | Immunogenic protein MPT64 precursor                  | II |
| 50318 | Mycobacterium tuberculosis        | 6 kDa early secretory antigenic target               | II |
| 50366 | Mycobacterium tuberculosis        | PPE FAMILY PROTEIN                                   | II |
| 50437 | Mycobacterium bovis BCG           | alpha-antigen                                        | II |
| 50438 | Mycobacterium bovis AN5           | alpha-antigen                                        | II |

|       |                                   |                                            |    |
|-------|-----------------------------------|--------------------------------------------|----|
| 50444 | Mycobacterium tuberculosis        | Antigen 85-A precursor                     | II |
| 50589 | Mycobacterium tuberculosis H37Rv  | ESAT-6-like protein esxN                   | II |
| 50756 | Mycobacterium tuberculosis H37Rv  | ESAT-6-like protein esxN                   | II |
| 50778 | Mycobacterium bovis AN5           | protein or antigen 85-B                    | II |
| 50860 | Mycobacterium tuberculosis Erdman | ESAT-6-like protein esxI                   | II |
| 50966 | Mycobacterium tuberculosis        | Phosphate-binding protein pstS 1 precursor | II |
| 50981 | Mycobacterium tuberculosis        | 6 kDa early secretory antigenic target     | II |
| 51114 | Mycobacterium bovis BCG           | secreted antigen 85-B fbpB                 | II |
| 51367 | Mycobacterium tuberculosis        | PPE FAMILY PROTEIN                         | II |
| 51633 | Mycobacterium tuberculosis        | lipoprotein lppO                           | II |
| 51643 | Mycobacterium tuberculosis        | Immunogenic protein MPT64 precursor        | II |
| 52024 | Mycobacterium bovis BCG           | SECRETED ANTIGEN 85-B FBPB                 | II |
| 52025 | Mycobacterium tuberculosis        | Antigen 85-B precursor                     | II |
| 52030 | Mycobacterium tuberculosis        | Antigen 85-A precursor                     | II |
| 52626 | Mycobacterium bovis BCG           | Immunogenic protein MPB70 precursor        | II |
| 52668 | Mycobacterium bovis BCG           | alpha-antigen                              | II |
| 52690 | Mycobacterium tuberculosis        | 10 kDa culture filtrate antigen EsxB       | II |
| 52691 | Mycobacterium tuberculosis H37Rv  | ESAT-6-like protein esxB                   | II |
| 53172 | Mycobacterium tuberculosis        | Putative lipoprotein lppX precursor        | II |
| 53312 | Mycobacterium tuberculosis H37Rv  | ESAT-6-like protein esxQ                   | II |
| 53355 | Mycobacterium tuberculosis        | 14 kDa antigen                             | II |
| 53356 | Mycobacterium tuberculosis        | 14 kDa antigen                             | II |
| 53370 | Mycobacterium tuberculosis        | IMMUNOGENIC PROTEIN MPT64                  | II |
| 53833 | Mycobacterium tuberculosis H37Rv  | PPE FAMILY PROTEIN                         | II |
| 53974 | Mycobacterium tuberculosis H37Rv  | ESAT-6-like protein esxQ                   | II |
| 54355 | Mycobacterium bovis BCG           | 60 KDA chaperonin 2 groel2                 | II |
| 54365 | Mycobacterium bovis BCG           | secreted antigen 85-B fbpB                 | II |
| 54516 | Mycobacterium tuberculosis        | 14 kDa antigen                             | II |
| 54829 | Mycobacterium bovis BCG           | secreted antigen 85-B fbpB                 | II |
| 54977 | Mycobacterium bovis BCG           | Antigen 85-B precursor                     | II |
| 54988 | Mycobacterium tuberculosis H37Rv  | ESAT-6-like protein esxN                   | II |
| 55157 | Mycobacterium tuberculosis H37Rv  | PPE FAMILY PROTEIN                         | II |
| 55158 | Mycobacterium tuberculosis H37Rv  | PPE FAMILY PROTEIN                         | II |
| 55394 | Mycobacterium tuberculosis H37Rv  | ESAT-6-like protein esxB                   | II |
| 55882 | Mycobacterium tuberculosis        | 14 kDa antigen                             | II |
| 56043 | Mycobacterium tuberculosis        | 14 kDa antigen                             | II |
| 56836 | Mycobacterium tuberculosis H37Rv  | 6 kDa early secretory antigenic target     | II |
| 56884 | Mycobacterium tuberculosis        | Antigen 85-A precursor                     | II |
| 56894 | Mycobacterium bovis BCG           | secreted antigen 85-B fbpB                 | II |
| 56895 | Mycobacterium tuberculosis        | Antigen 85-B                               | II |
| 56994 | Mycobacterium tuberculosis        | Antigen 85-C precursor                     | II |
| 57047 | Mycobacterium tuberculosis        | ESAT-6-like protein esxH                   | II |
| 57048 | Mycobacterium tuberculosis H37Rv  | ESAT-6-like protein esxR                   | II |
| 57256 | Mycobacterium tuberculosis        | Putative lipoprotein lppX precursor        | II |
| 57415 | Mycobacterium tuberculosis        | 14 kDa antigen                             | II |
| 57417 | Mycobacterium tuberculosis        | 14 kDa antigen                             | II |
| 57719 | Mycobacterium tuberculosis        | Immunogenic protein MPT70 precursor        | II |
| 58022 | Mycobacterium tuberculosis        | Lipoprotein lpqH precursor                 | II |
| 58051 | Mycobacterium bovis BCG           | Antigen 85-B precursor                     | II |
| 58124 | Mycobacterium bovis BCG           | Antigen 85-B precursor                     | II |
| 58144 | Mycobacterium tuberculosis        | Phosphate-binding protein pstS 1 precursor | II |
| 58225 | Mycobacterium tuberculosis H37Rv  | 6 kDa early secretory antigenic target     | II |
| 58475 | Mycobacterium tuberculosis        | Putative lipoprotein lppX precursor        | II |
| 59629 | Mycobacterium bovis BCG           | SECRETED ANTIGEN 85-B FBPB                 | II |
| 59748 | Mycobacterium tuberculosis H37Rv  | ESAT-6-like protein esxR                   | II |
| 59861 | Mycobacterium bovis BCG           | alpha-antigen                              | II |
| 60061 | Mycobacterium tuberculosis        | Phosphate-binding protein pstS 1 precursor | II |
| 60262 | Mycobacterium tuberculosis        | Antigen 85-B precursor                     | II |
| 60263 | Mycobacterium tuberculosis        | MPT51/MPB51 antigen precursor              | II |
| 60442 | Mycobacterium bovis BCG           | SECRETED ANTIGEN 85-B FBPB                 | II |
| 61016 | Mycobacterium bovis BCG           | secreted antigen 85-B fbpB                 | II |
| 61178 | Mycobacterium bovis BCG           | Immunogenic protein MPB70 precursor        | II |
| 61240 | Mycobacterium bovis BCG           | alpha-antigen                              | II |
| 61578 | Mycobacterium tuberculosis        | 6 kDa early secretory antigenic target     | II |
| 61782 | Mycobacterium tuberculosis        | ESAT-6-like protein esxB                   | II |
| 61834 | Mycobacterium tuberculosis        | Immunogenic protein MPT64 precursor        | II |
| 61914 | Mycobacterium tuberculosis        | Putative lipoprotein lppX precursor        | II |
| 62057 | Mycobacterium bovis               | 60 KDA CHAPERONIN 2 GROEL2                 | II |
| 62062 | Mycobacterium tuberculosis        | 14 kDa antigen                             | II |
| 62187 | Mycobacterium tuberculosis        | Putative lipoprotein lppX precursor        | II |
| 62899 | Mycobacterium tuberculosis        | 10 kDa chaperonin                          | II |
| 62989 | Mycobacterium tuberculosis        | COG0234: Co-chaperonin GroES (HSP10)       | II |
| 62998 | Mycobacterium tuberculosis        | Lipoprotein lpqH precursor                 | II |

|       |                                    |                                                                       |    |
|-------|------------------------------------|-----------------------------------------------------------------------|----|
| 63010 | Mycobacterium tuberculosis         | 6 kDa early secretory antigenic target                                | II |
| 63011 | Mycobacterium tuberculosis H37Rv   | 6 kDa early secretory antigenic target                                | II |
| 63662 | Mycobacterium tuberculosis         | 60 kDa chaperonin 2                                                   | II |
| 63663 | Mycobacterium bovis                | 60 kDa chaperonin 2                                                   | II |
| 63956 | Mycobacterium bovis BCG            | Antigen 85-B precursor                                                | II |
| 63960 | Mycobacterium tuberculosis         | Phosphate-binding protein pstS 1 precursor                            | II |
| 63966 | Mycobacterium bovis                | Antigen 85-B                                                          | II |
| 64077 | Mycobacterium bovis BCG            | SECRETED ANTIGEN 85-B FBPB                                            | II |
| 64078 | Mycobacterium bovis BCG            | Antigen 85-B precursor                                                | II |
| 64079 | Mycobacterium tuberculosis         | Antigen 85-B                                                          | II |
| 64081 | Mycobacterium tuberculosis         | Antigen 85-A precursor                                                | II |
| 64580 | Mycobacterium tuberculosis         | Putative lipoprotein lppX precursor                                   | II |
| 64822 | Mycobacterium tuberculosis         | PPE FAMILY PROTEIN                                                    | II |
| 65499 | Mycobacterium bovis BCG            | Antigen 85-B precursor                                                | II |
| 65767 | Mycobacterium tuberculosis         | PPE FAMILY PROTEIN                                                    | II |
| 65912 | Mycobacterium tuberculosis         | PPE FAMILY PROTEIN                                                    | II |
| 65965 | Mycobacterium tuberculosis         | Immunogenic protein MPT64 precursor                                   | II |
| 66693 | Mycobacterium tuberculosis         | mtp40 protein - Mycobacterium tuberculosis                            | II |
| 67156 | Mycobacterium tuberculosis         | 14 kDa antigen                                                        | II |
| 67211 | Mycobacterium tuberculosis         | Putative lipoprotein lppX precursor                                   | II |
| 67233 | Mycobacterium bovis BCG            | Immunogenic protein MPB70 precursor                                   | II |
| 67588 | Mycobacterium tuberculosis H37Rv   | MCE-FAMILY PROTEIN MCE2A                                              | II |
| 67607 | Mycobacterium tuberculosis         | 19 KDA LIPOPROTEIN ANTIGEN PRECURSOR LPQH                             | II |
| 67657 | Mycobacterium tuberculosis         | 10 kDa chaperonin                                                     | II |
| 67695 | Mycobacterium bovis BCG            | SECRETED ANTIGEN 85-B FBPB                                            | II |
| 67697 | Mycobacterium tuberculosis         | Antigen 85-B                                                          | II |
| 67783 | Mycobacterium tuberculosis         | Lipoprotein lppH precursor                                            | II |
| 68189 | Mycobacterium tuberculosis         | 60 KDA CHAPERONIN 2 GROEL2                                            | II |
| 68285 | Mycobacterium tuberculosis         | PPE FAMILY PROTEIN                                                    | II |
| 68529 | Mycobacterium bovis BCG            | Antigen 85-B precursor                                                | II |
| 69128 | Mycobacterium tuberculosis         | PPE family protein                                                    | II |
| 69308 | Mycobacterium tuberculosis         | Lipoprotein lppH                                                      | II |
| 69467 | Mycobacterium tuberculosis H37Rv   | ESAT-6-like protein esxQ                                              | II |
| 69796 | Mycobacterium tuberculosis         | PPE FAMILY PROTEIN                                                    | II |
| 70124 | Mycobacterium tuberculosis         | Immunogenic protein MPT70 precursor                                   | II |
| 70687 | Mycobacterium tuberculosis         | 10 kDa culture filtrate antigen EsxB                                  | II |
| 70903 | Mycobacterium tuberculosis         | IMMUNOGENIC PROTEIN MPT63                                             | II |
| 70980 | Mycobacterium tuberculosis         | IMMUNOGENIC PROTEIN MPT64                                             | II |
| 71346 | Mycobacterium tuberculosis         | Lipoprotein lppH precursor                                            | II |
| 71492 | Mycobacterium tuberculosis         | 6 kDa early secretory antigenic target                                | II |
| 71596 | Mycobacterium tuberculosis         | 60 KDA CHAPERONIN 2 GROEL2                                            | II |
| 71945 | Mycobacterium tuberculosis         | PPE FAMILY PROTEIN                                                    | II |
| 72008 | Mycobacterium tuberculosis         | 60 KDA CHAPERONIN 2 GROEL2                                            | II |
| 72085 | Mycobacterium bovis BCG            | SECRETED ANTIGEN 85-B FBPB                                            | II |
| 72294 | Mycobacterium tuberculosis         | 10 kDa chaperonin                                                     | II |
| 72312 | Mycobacterium tuberculosis         | Antigen 85-A precursor                                                | II |
| 72313 | Mycobacterium bovis BCG            | SECRETED ANTIGEN 85-B FBPB                                            | II |
| 72314 | Mycobacterium tuberculosis         | Antigen 85-B                                                          | II |
| 72323 | Mycobacterium tuberculosis         | Immunogenic protein MPT64 precursor                                   | II |
| 72514 | Mycobacterium bovis BCG            | secreted antigen 85-B fbpB                                            | II |
| 72741 | Mycobacterium tuberculosis         | mtp40 protein - Mycobacterium tuberculosis                            | II |
| 72888 | Mycobacterium tuberculosis         | 6 kDa early secretory antigenic target                                | II |
| 73049 | Mycobacterium tuberculosis CDC1551 | proteinase                                                            | II |
| 73069 | Mycobacterium tuberculosis H37Rv   | Probable integral membrane cytochrome D ubiquinol oxidase (subunit I) | II |
| 73235 | Mycobacterium bovis BCG            | Antigen 85-B precursor                                                | II |
| 73294 | Mycobacterium bovis BCG            | Antigen 85-B precursor                                                | II |
| 73361 | Mycobacterium tuberculosis H37Rv   | ESAT-6-like protein esxR                                              | II |
| 73362 | Mycobacterium tuberculosis         | ESAT-6-like protein esxH                                              | II |
| 73378 | Mycobacterium tuberculosis         | Phosphate-binding protein pstS 1 precursor                            | II |
| 73524 | Mycobacterium tuberculosis H37Rv   | MCE-FAMILY PROTEIN MCE4C                                              | II |
| 73578 | Mycobacterium tuberculosis         | Antigen 85-A precursor                                                | II |
| 73593 | Mycobacterium tuberculosis         | IMMUNOGENIC PROTEIN MPT64                                             | II |
| 73690 | Mycobacterium tuberculosis         | 60 kDa chaperonin 2                                                   | II |
| 73784 | Mycobacterium tuberculosis         | 14 kDa antigen                                                        | II |
| 73962 | Mycobacterium tuberculosis         | 60 kDa chaperonin                                                     | II |
| 73964 | Mycobacterium tuberculosis         | 60 KDA CHAPERONIN 2 GROEL2                                            | II |
| 74486 | Mycobacterium bovis BCG            | alpha-antigen                                                         | II |
| 74769 | Mycobacterium bovis BCG            | Antigen 85-B precursor                                                | II |
| 74889 | Mycobacterium bovis BCG            | Antigen 85-B precursor                                                | II |
| 75152 | Mycobacterium leprae               | 10 kDa chaperonin                                                     | II |
| 75153 | Mycobacterium tuberculosis         | 10 kDa chaperonin                                                     | II |
| 75172 | Mycobacterium tuberculosis         | Immunogenic protein MPT64 precursor                                   | II |
| 75463 | Mycobacterium tuberculosis         | ESAT-6-like protein esxH                                              | II |

|        |                                  |                                           |    |
|--------|----------------------------------|-------------------------------------------|----|
| 75495  | Mycobacterium tuberculosis       | 6 kDa early secretory antigenic target    | II |
| 75496  | Mycobacterium tuberculosis H37Rv | ESAT-6-like protein esxB                  | II |
| 75786  | Mycobacterium leprae             | 10 kDa chaperonin                         | II |
| 76454  | Mycobacterium bovis BCG          | secreted antigen 85-B fbpB                | II |
| 76583  | Mycobacterium bovis BCG          | secreted antigen 85-B fbpB                | II |
| 76584  | Mycobacterium tuberculosis       | Antigen 85-B                              | II |
| 78930  | Mycobacterium tuberculosis       | 60 kDa chaperonin 2                       | II |
| 78960  | Mycobacterium tuberculosis       | 60 kDa chaperonin 2                       | II |
| 78980  | Mycobacterium tuberculosis       | 60 kDa chaperonin 2                       | II |
| 78996  | Mycobacterium tuberculosis       | 60 kDa chaperonin 2                       | II |
| 79000  | Mycobacterium tuberculosis       | 60 kDa chaperonin 2                       | II |
| 79056  | Mycobacterium bovis              | heat shock protein 65                     | II |
| 79110  | Mycobacterium tuberculosis       | 60 kDa chaperonin 2                       | II |
| 80451  | Mycobacterium tuberculosis H37Rv | early secretory antigenic target, 6 kDa   | II |
| 82519  | Mycobacterium tuberculosis H37Rv | 10 kDa culture filtrate antigen EsxB      | II |
| 82520  | Mycobacterium tuberculosis H37Rv | 10 kDa culture filtrate antigen EsxB      | II |
| 85043  | Mycobacterium tuberculosis H37Rv | 10 kDa culture filtrate antigen EsxB      | II |
| 85635  | Mycobacterium tuberculosis H37Rv | early secretory antigenic target, 6 kDa   | II |
| 85735  | Mycobacterium tuberculosis H37Rv | early secretory antigenic target, 6 kDa   | II |
| 100510 | Mycobacterium tuberculosis       | PPE family protein                        | II |
| 100593 | Mycobacterium tuberculosis       | PPE family protein                        | II |
| 102321 | Mycobacterium tuberculosis       | IMMUNOGENIC PROTEIN MPT63                 | II |
| 102375 | Mycobacterium tuberculosis       | IMMUNOGENIC PROTEIN MPT63                 | II |
| 102640 | Mycobacterium tuberculosis       | IMMUNOGENIC PROTEIN MPT63                 | II |
| 102648 | Mycobacterium tuberculosis       | IMMUNOGENIC PROTEIN MPT63                 | II |
| 102708 | Mycobacterium tuberculosis       | IMMUNOGENIC PROTEIN MPT63                 | II |
| 102824 | Mycobacterium tuberculosis       | IMMUNOGENIC PROTEIN MPT63                 | II |
| 102870 | Mycobacterium tuberculosis       | IMMUNOGENIC PROTEIN MPT63                 | II |
| 102929 | Mycobacterium tuberculosis       | IMMUNOGENIC PROTEIN MPT63                 | II |
| 102963 | Mycobacterium tuberculosis       | IMMUNOGENIC PROTEIN MPT63                 | II |
| 102966 | Mycobacterium tuberculosis       | IMMUNOGENIC PROTEIN MPT63                 | II |
| 103408 | Mycobacterium tuberculosis       | Chaperone protein dnaK                    | II |
| 103416 | Mycobacterium tuberculosis       | Antigen 85-A precursor                    | II |
| 103423 | Mycobacterium tuberculosis       | Antigen 85-A precursor                    | II |
| 105967 | Mycobacterium tuberculosis       | 19 KDA LIPOPROTEIN ANTIGEN PRECURSOR LPQH | II |
| 105976 | Mycobacterium tuberculosis       | 19 KDA LIPOPROTEIN ANTIGEN PRECURSOR LPQH | II |
| 106686 | Mycobacterium tuberculosis       | 6 kDa early secretory antigenic target    | II |
| 110765 | Mycobacterium tuberculosis       | hypothetical protein                      | II |
| 110788 | Mycobacterium tuberculosis       | hypothetical protein                      | II |
| 110790 | Mycobacterium tuberculosis       | hypothetical protein                      | II |
| 110791 | Mycobacterium tuberculosis       | hypothetical protein                      | II |
| 110822 | Mycobacterium tuberculosis       | hypothetical protein                      | II |
| 110827 | Mycobacterium tuberculosis       | hypothetical protein                      | II |
| 110831 | Mycobacterium tuberculosis       | hypothetical protein                      | II |
| 110838 | Mycobacterium tuberculosis       | hypothetical protein                      | II |
| 110878 | Mycobacterium tuberculosis       | hypothetical protein                      | II |
| 110881 | Mycobacterium tuberculosis       | hypothetical protein                      | II |
| 110905 | Mycobacterium tuberculosis       | hypothetical protein                      | II |
| 110907 | Mycobacterium tuberculosis       | hypothetical protein                      | II |
| 110925 | Mycobacterium tuberculosis       | hypothetical protein                      | II |
| 110928 | Mycobacterium tuberculosis       | hypothetical protein                      | II |
| 110929 | Mycobacterium tuberculosis       | hypothetical protein                      | II |
| 110930 | Mycobacterium tuberculosis       | hypothetical protein                      | II |
| 110935 | Mycobacterium tuberculosis       | hypothetical protein                      | II |
| 110937 | Mycobacterium tuberculosis       | hypothetical protein                      | II |
| 110944 | Mycobacterium tuberculosis       | hypothetical protein                      | II |
| 110953 | Mycobacterium tuberculosis       | hypothetical protein                      | II |
| 110966 | Mycobacterium tuberculosis       | hypothetical protein                      | II |
| 110973 | Mycobacterium tuberculosis       | hypothetical protein                      | II |
| 110998 | Mycobacterium tuberculosis       | hypothetical protein                      | II |
| 111006 | Mycobacterium tuberculosis       | hypothetical protein                      | II |
| 111011 | Mycobacterium tuberculosis       | hypothetical protein                      | II |
| 111014 | Mycobacterium tuberculosis       | hypothetical protein                      | II |
| 111023 | Mycobacterium tuberculosis       | hypothetical protein                      | II |
| 111047 | Mycobacterium tuberculosis       | hypothetical protein                      | II |
| 111054 | Mycobacterium tuberculosis       | hypothetical protein                      | II |
| 114830 | Mycobacterium                    | 60 KDA CHAPERONIN 2 GROEL2                | II |
| 114858 | Mycobacterium                    | 60 KDA CHAPERONIN 2 GROEL2                | II |
| 115927 | Mycobacterium tuberculosis       | hypothetical protein                      | II |
| 118738 | Mycobacterium tuberculosis H37Ra | PPE family protein                        | II |
| 118739 | Mycobacterium tuberculosis H37Ra | PPE family protein                        | II |
| 118742 | Mycobacterium tuberculosis H37Ra | PPE family protein                        | II |
| 118747 | Mycobacterium tuberculosis H37Ra | PPE family protein                        | II |

|              |                                  |                                          |    |
|--------------|----------------------------------|------------------------------------------|----|
| 118756       | Mycobacterium tuberculosis H37Ra | PPE family protein                       | II |
| 118765       | Mycobacterium tuberculosis H37Ra | PPE family protein                       | II |
| 118792       | Mycobacterium tuberculosis H37Ra | PPE family protein                       | II |
| 118803       | Mycobacterium tuberculosis H37Ra | PPE family protein                       | II |
| 118825       | Mycobacterium tuberculosis H37Ra | PPE family protein                       | II |
| 118840       | Mycobacterium tuberculosis H37Ra | PPE family protein                       | II |
| 118849       | Mycobacterium tuberculosis H37Ra | PPE family protein                       | II |
| 118856       | Mycobacterium tuberculosis H37Ra | PPE family protein                       | II |
| 118857       | Mycobacterium tuberculosis H37Ra | PPE family protein                       | II |
| 118869       | Mycobacterium bovis              | 60 kDa chaperonin 2                      | II |
| 118876       | Mycobacterium tuberculosis H37Ra | PPE family protein                       | II |
| 118878       | Mycobacterium tuberculosis H37Ra | PPE family protein                       | II |
| 118880       | Mycobacterium tuberculosis H37Ra | PPE family protein                       | II |
| 118886       | Mycobacterium tuberculosis H37Ra | PPE family protein                       | II |
| 118889       | Mycobacterium tuberculosis H37Ra | PPE family protein                       | II |
| 118890       | Mycobacterium tuberculosis H37Ra | PPE family protein                       | II |
| 118900       | Mycobacterium tuberculosis H37Ra | PPE family protein                       | II |
| 118920       | Mycobacterium tuberculosis H37Ra | PPE family protein                       | II |
| 118931       | Mycobacterium tuberculosis H37Ra | PPE family protein                       | II |
| 118932       | Mycobacterium tuberculosis H37Ra | PPE family protein                       | II |
| 118934       | Mycobacterium tuberculosis H37Ra | PPE family protein                       | II |
| 118936       | Mycobacterium tuberculosis H37Ra | PPE family protein                       | II |
| 118939       | Mycobacterium tuberculosis H37Ra | PPE family protein                       | II |
| 118942       | Mycobacterium tuberculosis H37Ra | PPE family protein                       | II |
| 118990       | Mycobacterium tuberculosis H37Ra | PPE family protein                       | II |
| 119007       | Mycobacterium tuberculosis H37Ra | PPE family protein                       | II |
| 119019       | Mycobacterium tuberculosis H37Ra | PPE family protein                       | II |
| 119020       | Mycobacterium tuberculosis H37Ra | PPE family protein                       | II |
| 119021       | Mycobacterium tuberculosis H37Ra | PPE family protein                       | II |
| 119028       | Mycobacterium tuberculosis H37Ra | PPE family protein                       | II |
| 119033       | Mycobacterium tuberculosis H37Ra | PPE family protein                       | II |
| 119035       | Mycobacterium tuberculosis H37Ra | PPE family protein                       | II |
| 119047       | Mycobacterium tuberculosis H37Ra | PPE family protein                       | II |
| 119050       | Mycobacterium tuberculosis H37Ra | PPE family protein                       | II |
| 119056       | Mycobacterium tuberculosis H37Ra | PPE family protein                       | II |
| 125165       | Mycobacterium tuberculosis H37Rv | PPE family protein                       | II |
| 125317       | Mycobacterium tuberculosis       | KatG                                     | II |
| 136442       | Mycobacterium tuberculosis       | Immunogenic protein MPT64 precursor      | II |
| 142231       | Mycobacterium tuberculosis       | Lipoprotein lpqH precursor               | II |
| 142232       | Mycobacterium tuberculosis       | POSSIBLE CONSERVED TRANSMEMBRANE PROTEIN | II |
| 142233       | Mycobacterium tuberculosis       | ATP-dependent helicase                   | II |
| 145826       | Mycobacterium tuberculosis       | 6 kDa early secretory antigenic target   | II |
| AJISPRTLNAW  | HIV                              | p24                                      | I  |
| AADTGNSSQ    | HIV                              | p17                                      | I  |
| AAENLWVTVYY  | HIV                              | gp160                                    | I  |
| AAEWDRLHPVH  | HIV                              | p24                                      | I  |
| AAFDSLFFL    | HIV                              | Nef                                      | I  |
| AALDLSHFL    | HIV                              | Nef                                      | I  |
| AALDMSHFL    | HIV                              | Nef                                      | I  |
| AAVDLSHFL    | HIV                              | Nef                                      | I  |
| AAVDLSHFLK   | HIV                              | Nef                                      | I  |
| AAVDLSHFLKEK | HIV                              | Nef                                      | I  |
| AAVKAACWW    | HIV                              | Integrase                                | I  |
| ACQGVGGPGHK  | HIV                              | p24                                      | I  |
| ACQGVGGPSHK  | HIV                              | p24                                      | I  |
| ACVPTDPNP    | HIV                              | gp160                                    | I  |
| AEAMSQVTNS   | HIV                              | p2p7p1p6                                 | I  |
| AENLWVTVYY   | HIV                              | gp160                                    | I  |
| AENLWVTVY    | HIV                              | gp160                                    | I  |
| AENLWVTVYY   | HIV                              | gp160                                    | I  |
| AEQASADVKNW  | HIV                              | p24                                      | I  |
| AEQASQDVKNW  | HIV                              | p24                                      | I  |
| AEQASQEVKNW  | HIV                              | p24                                      | I  |
| AEQASQEVKNWM | HIV                              | p24                                      | I  |
| AEQATQDVKNW  | HIV                              | p24                                      | I  |
| AESFRFEET    | HIV                              | p2p7p1p6                                 | I  |
| AETFYVDGA    | HIV                              | RT                                       | I  |
| AETFYVDGAAN  | HIV                              | RT                                       | I  |
| AETGQETAY    | HIV                              | Integrase                                | I  |
| AETGQETAYY   | HIV                              | Integrase                                | I  |
| AEWDRLHPV    | HIV                              | p24                                      | I  |
| AEWDRVHPV    | HIV                              | p24                                      | I  |
| AFDLSFFLK    | HIV                              | Nef                                      | I  |

|                |     |             |   |
|----------------|-----|-------------|---|
| AFHHVAREK      | HIV | Nef         | I |
| AFHHVAREL      | HIV | Nef         | I |
| AFSPEVPMFSALS  | HIV | p24         | I |
| AFSPEVPMFT     | HIV | p24         | I |
| AIFQCSMTK      | HIV | RT          | I |
| AIFQSSMTK      | HIV | RT          | I |
| AIIRILQQL      | HIV | p24         | I |
| AIRKAILGR      | HIV | Vif         | I |
| AISPRTLNAW     | HIV | p24         | I |
| AISPRTLNAWV    | HIV | p24         | I |
| AKAYETEKHNWV   | HIV | gp160       | I |
| AKTIIVQLTEPVE  | HIV | gp160       | I |
| ALAAALTPK      | HIV | Vif         | I |
| ALDLSHFL       | HIV | Nef         | I |
| ALDLSHFLK      | HIV | Nef         | I |
| ALGPGASLEEM    | HIV | p24         | I |
| ALHHVAREL      | HIV | Nef         | I |
| ALIRILQQL      | HIV | Vpr         | I |
| ALKHRAYEL      | HIV | Nef         | I |
| ALQDSGLEV      | HIV | RT          | I |
| ALSEGATPQDL    | HIV | p24         | I |
| ALSEGATPQDLNMM | HIV | p24         | I |
| ALTSSNTAA      | HIV | Nef         | I |
| ALVEICTEL      | HIV | RT          | I |
| ALVEICTEM      | HIV | RT          | I |
| ALVEICTEMEK    | HIV | RT          | I |
| ALVEMGHHA      | HIV | Vpu         | I |
| ALVEMGHHV      | HIV | Vpu         | I |
| ALVICTEMEK     | HIV | RT          | I |
| AMQMLKDTI      | HIV | p24         | I |
| AMQMLKETI      | HIV | p24         | I |
| ANPDCKTIL      | HIV | p24         | I |
| APQGHNNQVSI    | HIV | Tat         | I |
| APTKAKRRV      | HIV | gp160       | I |
| APTKAKRRVV     | HIV | gp160       | I |
| AQNPEIVY       | HIV | RT          | I |
| AQNPEIVYQY     | HIV | RT          | I |
| ARLVITTYW      | HIV | Vif         | I |
| ARRRRRRRW      | HIV | Rev         | I |
| ARVLIVERY      | HIV | gp160       | I |
| ASILRGGKLDK    | HIV | p17         | I |
| ASQEVKNWM      | HIV | p24         | I |
| ASVLSGGEL      | HIV | p17         | I |
| ATLEEMMTA      | HIV | p24         | I |
| ATLWCVHQRIDI   | HIV | p17         | I |
| ATLYCVHQK      | HIV | p17         | I |
| ATLYCVHQR      | HIV | p17         | I |
| ATPQDLNMML     | HIV | p24         | I |
| ATPQDLNTM      | HIV | p24         | I |
| ATPQDLNTMLNT   | HIV | p24         | I |
| ATQEVKNWM      | HIV | p24         | I |
| AVDLSHFLK      | HIV | Nef         | I |
| AVFIHNFKR      | HIV | Integrase   | I |
| AVFIHNFKRK     | HIV | Integrase   | I |
| AVLSVVNRV      | HIV | gp160       | I |
| AVLYCVHQR      | HIV | p17         | I |
| AVRERMRT       | HIV | Nef         | I |
| AVRHFPRIW      | HIV | Vpr         | I |
| AVRHFRIW       | HIV | Vpr         | I |
| AVRHRPRIW      | HIV | Vpr         | I |
| AVRIIKIL/M     | HIV | Rev         | I |
| CAPAGFAIL      | HIV | gp160       | I |
| CGKEGHAR       | HIV | p2p7p1p6    | I |
| CKNVSTVQC      | HIV | gp160       | I |
| CLHCQVCFI      | HIV | Tat         | I |
| CPKVSFEPI      | HIV | gp160       | I |
| CQGVGGPGHK     | HIV | p24         | I |
| CRAPRKKGC      | HIV | p2p7p1p6    | I |
| CTERQANFL      | HIV | p2p7p1p6    | I |
| CTLNFPISPI     | HIV | Protease-RT | I |
| CTNVSTVQC      | HIV | gp160       | I |
| CTPAGYAILKC    | HIV | gp160       | I |
| CTPYDINQMLNC   | HIV | p24         | I |

|                |     |           |   |
|----------------|-----|-----------|---|
| CTRPNNNTRK     | HIV | gp160     | I |
| CVHQRIEK       | HIV | p17       | I |
| DAKLIITY       | HIV | Vif       | I |
| DAKLVITTY      | HIV | Vif       | I |
| DCKTILKAL      | HIV | p24       | I |
| DCTERQANFLG    | HIV | p2p7p1p6  | I |
| DIRQGPKEPFR    | HIV | p24       | I |
| DIYKRWII       | HIV | p24       | I |
| DLADQLIHLY     | HIV | Vif       | I |
| DLEIGQHRTK     | HIV | RT        | I |
| DLNMMLNIV      | HIV | p24       | I |
| DLNTMLNTV      | HIV | p24       | I |
| DLNTMLNTVG     | HIV | p24       | I |
| DLSHFLKEK      | HIV | Nef       | I |
| DNLWVTVYY      | HIV | gp160     | I |
| DPEKEVLQWK     | HIV | Nef       | I |
| DPNPQEMVL      | HIV | gp160     | I |
| DPNPQEVAl      | HIV | gp160     | I |
| DPNPQEVVL      | HIV | gp160     | I |
| DQGPQREPY      | HIV | Vpr       | I |
| DRFFKTLRA      | HIV | p24       | I |
| DRFWKTLRA      | HIV | p24       | I |
| DRFYKTLRA      | HIV | p24       | I |
| DRFYKTLRAE     | HIV | p24       | I |
| DRFYKTLRAEQ    | HIV | p24       | I |
| DRFYKTRAE      | HIV | p24       | I |
| DSRLAFHHM      | HIV | Nef       | I |
| DSRLAFHHV      | HIV | Nef       | I |
| DTGHSNQVSQNY   | HIV | p17       | I |
| DTINEEAIEW     | HIV | p24       | I |
| DTVLEDINL      | HIV | Protease  | I |
| DTVLEDMNL      | HIV | Protease  | I |
| DTVLEEMNL      | HIV | Protease  | I |
| DTVLEEWNL      | HIV | Protease  | I |
| DTWAGVEAIR     | HIV | Vpr       | I |
| DVKDTKEAL      | HIV | p17       | I |
| DVKQLTEVV      | HIV | RT        | I |
| DYVDRFFKTL     | HIV | p24       | I |
| DYVDRFYKT      | HIV | p24       | I |
| DYVDRFYKTL     | HIV | p24       | I |
| EAVRHFPRI      | HIV | Vpr       | I |
| EDMNLPRGW      | HIV | Protease  | I |
| EEAAEWDRl      | HIV | p24       | I |
| EEAAEWDRV      | HIV | p24       | I |
| EEGVGFVPRPQ    | HIV | Nef       | I |
| EEHEKYHSNW     | HIV | Integrase | I |
| EEINLPGKW      | HIV | Protease  | I |
| EEKAFSPEV      | HIV | p24       | I |
| EELKKTVRL      | HIV | Rev       | I |
| EELREHLLKW     | HIV | RT        | I |
| EELRQHLLR      | HIV | RT        | I |
| EELRQHLLRW     | HIV | RT        | I |
| EELRSLYNT      | HIV | p17       | I |
| EELRSLYNTV     | HIV | p17       | I |
| EEMMTACQGVG    | HIV | p24       | I |
| EEMNLPRGW      | HIV | Protease  | I |
| EGATPQDLNMML   | HIV | p24       | I |
| EGTDRIVIEI     | HIV | gp160     | I |
| EIIGDIRQAY     | HIV | gp160     | I |
| EIKDTKEAL      | HIV | p17       | I |
| EILKEPVGHV     | HIV | RT        | I |
| EIVASCDKCQL    | HIV | Integrase | I |
| EIYKRWIIl      | HIV | p24       | I |
| EKEGKISKI      | HIV | RT        | I |
| EKGGLEGLIHSQRR | HIV | Nef       | I |
| EKIRLRPGGKKYKL | HIV | p17       | I |
| ELDRWEKIRL     | HIV | p17       | I |
| ELHPDKWTV      | HIV | RT        | I |
| ELHPDRWTV      | HIV | RT        | I |
| ELKKIIGQVR     | HIV | Integrase | I |
| ELKSLFNTI      | HIV | p17       | I |
| ELRQHLLRW      | HIV | RT        | I |

|               |     |             |   |
|---------------|-----|-------------|---|
| ELRSLYNTV     | HIV | p17         | I |
| ELRSLYNTVA    | HIV | p17         | I |
| ELVNQIEQL     | HIV | RT          | I |
| EMMTACQGV     | HIV | p24         | I |
| ENLWVTVYY     | HIV | gp160       | I |
| EPFRDYVDRF    | HIV | p24         | I |
| EPFRDYVDRFF   | HIV | p24         | I |
| EPIDKELYPL    | HIV | p2p7p1p6    | I |
| EPIDKELYPLA   | HIV | p2p7p1p6    | I |
| EPIVGAETF     | HIV | RT          | I |
| EPIVGAETFY    | HIV | RT          | I |
| EPTAPPEESF    | HIV | p2p7p1p6    | I |
| EPVDPNLEPW    | HIV | Tat         | I |
| EPVDPRLPEW    | HIV | Tat         | I |
| EQASQEVKNWMT  | HIV | p24         | I |
| EREVLWKF      | HIV | Nef         | I |
| ERFAVNPGL     | HIV | p17         | I |
| ERILSTYLGR    | HIV | Rev         | I |
| ERQANFLGKIW   | HIV | p2p7p1p6    | I |
| ERYLKDQQL     | HIV | gp160       | I |
| ERYLKDQQLLG   | HIV | gp160       | I |
| ERYLRDQQL     | HIV | gp160       | I |
| ETAYFILKL     | HIV | Integrase   | I |
| ETFYVDGAANR   | HIV | RT          | I |
| ETGQETAY      | HIV | Integrase   | I |
| ETGQETAYY     | HIV | Integrase   | I |
| ETINEEAAEW    | HIV | p24         | I |
| ETKLGKAGY     | HIV | RT          | I |
| ETYGDTWAGV    | HIV | Vpr         | I |
| ETYGDTWTGV    | HIV | Vpr         | I |
| EVAQRAYR      | HIV | gp160       | I |
| EVFRPGGGDM    | HIV | gp160       | I |
| EVHPLGEAR     | HIV | Vif         | I |
| EVHNVWATHA    | HIV | gp160       | I |
| EVIPMFSAL     | HIV | p24         | I |
| EVIPMFTAL     | HIV | p24         | I |
| EVKDTKEAL     | HIV | p17         | I |
| EVKNWMTETL    | HIV | p24         | I |
| EVKNWMTETLL   | HIV | p24         | I |
| EVNIVTDSQY    | HIV | RT          | I |
| EYRKILRQR     | HIV | Vpu         | I |
| FFPDWKNYT     | HIV | Nef         | I |
| FHCQVCFITK    | HIV | Tat         | I |
| FHCQVCFMTK    | HIV | Tat         | I |
| FIMIVGGLV     | HIV | gp160       | I |
| FKNLKTGKY     | HIV | RT          | I |
| FKRKGIGGY     | HIV | Integrase   | I |
| FLGKIWPS      | HIV | p2p7p1p6    | I |
| FLGKIWPSHK    | HIV | p2p7p1p6    | I |
| FLGKIWPSYK    | HIV | p2p7p1p6    | I |
| FLKEKGGLEGL   | HIV | Nef         | I |
| FLQSRPEPTA    | HIV | p2p7p1p6    | I |
| FMKKGLGISY    | HIV | Tat         | I |
| FMTKGLGISY    | HIV | Tat         | I |
| FNCGGEFFY     | HIV | gp160       | I |
| FPDWQNYTP     | HIV | Nef         | I |
| FPISPIETV     | HIV | Protease-RT | I |
| FPISPIETVP    | HIV | Protease-RT | I |
| FPRIWLHGL     | HIV | Vpr         | I |
| FPRPWLHGL     | HIV | Vpr         | I |
| FPRPWLHSL     | HIV | Vpr         | I |
| FPRTLHGL      | HIV | Vpr         | I |
| FPVKQVPL      | HIV | Nef         | I |
| FPVRQVPL      | HIV | Nef         | I |
| FPVRQVPLR     | HIV | Nef         | I |
| FPVTPQVPL     | HIV | Nef         | I |
| FPVTPQVPLR    | HIV | Nef         | I |
| FPVTPQVPLRMTY | HIV | Nef         | I |
| FQTKGLGISY    | HIV | Tat         | I |
| FRDYVDRFF     | HIV | p24         | I |
| FRDYVDRFFK    | HIV | p24         | I |
| FRDYVDRFFKAL  | HIV | p24         | I |
| FRDYVDRFYK    | HIV | p24         | I |

|                 |     |              |   |
|-----------------|-----|--------------|---|
| FRDYVDRFYKTLRA  | HIV | p24          | I |
| FSFPQITLW       | HIV | Gag_Pol_TF   | I |
| FSPEVIPMF       | HIV | p24          | I |
| FSVPLDEDF       | HIV | RT           | I |
| FTTPDKKHQK      | HIV | RT           | I |
| FVNTPLVK        | HIV | RT           | I |
| FYCNSTQLF       | HIV | gp160        | I |
| FYCNTQLF        | HIV | gp160        | I |
| FYKTLRAEQ       | HIV | p24          | I |
| GAETFYVDGA      | HIV | RT           | I |
| GAFDLSFFL       | HIV | Nef          | I |
| GAFDLSFFLK      | HIV | Nef          | I |
| GALDLSFFL       | HIV | Nef          | I |
| GALDLSHFL       | HIV | Nef          | I |
| GATPQDLNMMMLNIV | HIV | p24          | I |
| GATPQDLNTMLNTV  | HIV | p24          | I |
| GDIYKRWII       | HIV | p24          | I |
| GDIYWKRWI       | HIV | p24          | I |
| GEFFYCDTS       | HIV | gp160        | I |
| GEIYKRWII       | HIV | p24          | I |
| GEIYKRWII       | HIV | p24          | I |
| GEIYKRWII       | HIV | p24          | I |
| GELDRWEKI       | HIV | p17          | I |
| GEVGFVVRPQV     | HIV | Nef          | I |
| GGHQAAMQMLK     | HIV | p24          | I |
| GGKKKYKLLK      | HIV | p17          | I |
| GGKKKYKLLKHIV   | HIV | p17          | I |
| GHQAAMEMLKD     | HIV | p24          | I |
| GHQAAMQML       | HIV | p24          | I |
| GHQAAMQMLKD     | HIV | p24          | I |
| GHQAAMQMLKE     | HIV | p24          | I |
| GIPHPAGLK       | HIV | RT           | I |
| GIPHPAGLKK      | HIV | RT           | I |
| GIRYPLTFGWCFK   | HIV | Nef          | I |
| GKKAIGTVL       | HIV | Protease     | I |
| GKKVVSQNYPIV    | HIV | p17-p24      | I |
| GKLDaweKIRLR    | HIV | p17          | I |
| GKLDswEKIRLR    | HIV | p17          | I |
| GLADQLIHL       | HIV | Vif          | I |
| GLLESSEGC       | HIV | p17          | I |
| GLNKIVRMY       | HIV | p24          | I |
| GMGSPQILV       | HIV | Rev          | I |
| GNFLQSRPTAPPF   | HIV | p2p7p1p6     | I |
| GNSSVVSQNY      | HIV | p17          | I |
| GPCKNVSTVQ      | HIV | gp160        | I |
| GPATLEEM        | HIV | p24          | I |
| PGHKARVL        | HIV | p24          | I |
| PGHKARVLA       | HIV | p24-p2p7p1p6 | I |
| PGIRYPLTFGWCF   | HIV | Nef          | I |
| PGVRYPLTF       | HIV | Nef          | I |
| PGVRYPLTFGWCY   | HIV | Nef          | I |
| GPESKKKVE       | HIV | Tat          | I |
| GPVKQWPL        | HIV | RT           | I |
| GPVKQWPLT       | HIV | RT           | I |
| GPSHKARVL       | HIV | p24          | I |
| GQGQWTYQI       | HIV | RT           | I |
| GQLDRWEKI       | HIV | p17          | I |
| GQMPRGSDI       | HIV | p24          | I |
| GQMPRGSDIA      | HIV | p24          | I |
| GQMVHQAIISP     | HIV | p24          | I |
| GQMVHQAIISPRTL  | HIV | p24          | I |
| GQMVHQAIISPRTLN | HIV | p24          | I |
| GRAFVTIGK       | HIV | gp160        | I |
| GRFPLTFGW       | HIV | Nef          | I |
| GRRGWEALK       | HIV | gp160        | I |
| GRRGWEALKY      | HIV | gp160        | I |
| GRRGWEVLKY      | HIV | gp160        | I |
| GSEELRSLY       | HIV | p17          | I |
| GTCKSVSTVQCTH   | HIV | gp160        | I |
| GTEELRSLY       | HIV | p17          | I |
| GVEFYVDGA       | HIV | RT           | I |
| GVGAAASRD       | HIV | Nef          | I |
| GVGAVSRD        | HIV | Nef          | I |
| GVGPGHKAR       | HIV | p24          | I |

|                |     |           |   |
|----------------|-----|-----------|---|
| GYFPDWQNY      | HIV | Nef       | I |
| HAPWDVNDL      | HIV | Vpu       | I |
| HEDIISLWDQSLK  | HIV | gp160     | I |
| HFPRIWLHGLG    | HIV | Vpr       | I |
| HIGPGRAFY      | HIV | gp160     | I |
| HIVSPRCEY      | HIV | Vif       | I |
| HLEGKVILV      | HIV | Integrase | I |
| HLKTAVQMAV     | HIV | Integrase | I |
| HLVWASREL      | HIV | p17       | I |
| HMYISKKAK      | HIV | Vif       | I |
| HPDIVIYQY      | HIV | RT        | I |
| HPKISSEVHI     | HIV | Vif       | I |
| HPKVSSEVHI     | HIV | Vif       | I |
| HPRISSEVHI     | HIV | Vif       | I |
| HPRVSSEVHI     | HIV | Vif       | I |
| HPVHAGPIA      | HIV | p24       | I |
| HPVHAGPVA      | HIV | p24       | I |
| HPVSLHGMDDE    | HIV | Nef       | I |
| HQAAMQMLK      | HIV | p24       | I |
| HQAAMQMLKETINE | HIV | p24       | I |
| HQAISPRTL      | HIV | p24       | I |
| HQKEPPFLW      | HIV | RT        | I |
| HQMKDCNERQAN   | HIV | p2p7p1p6  | I |
| HQISPRTL       | HIV | p24       | I |
| HQRIEIKDTK     | HIV | p17       | I |
| HRLRDLCLI      | HIV | gp160     | I |
| HSFNCGGEF      | HIV | gp160     | I |
| HSQRRQDIL      | HIV | Nef       | I |
| HSQRRQDILDWYI  | HIV | Nef       | I |
| HTGERDWHL      | HIV | Vif       | I |
| HTQGYFPDW      | HIV | Nef       | I |
| HTQGYFPDWQ     | HIV | Nef       | I |
| HVASGYIEA      | HIV | Integrase | I |
| HVPHAGPIA      | HIV | p24       | I |
| HYCAPAGFAIL    | HIV | gp160     | I |
| HYMLKHIVW      | HIV | p17       | I |
| HYMLKHLVW      | HIV | p17       | I |
| HYMLKHLVWAS    | HIV | p17       | I |
| HYMLNHIVW      | HIV | p17       | I |
| IAKNCRAPRK     | HIV | p2p7p1p6  | I |
| IAKNCRAPRKK    | HIV | p2p7p1p6  | I |
| IALESIVW       | HIV | RT        | I |
| IAMESIVW       | HIV | RT        | I |
| IATESIVW       | HIV | RT        | I |
| IATLWCVHQR     | HIV | p17       | I |
| IDIKDTKEAL     | HIV | p17       | I |
| IEEKAFSPEV     | HIV | p24       | I |
| IEEKAFSPEVI    | HIV | p24       | I |
| IEELRQHLL      | HIV | RT        | I |
| IEICGHKAIG     | HIV | Protease  | I |
| IEIKDTKEAL     | HIV | p17       | I |
| IFPFRAFYA      | HIV | gp160     | I |
| IGPGRAFYAR     | HIV | gp160     | I |
| IHSISERIL      | HIV | Rev       | I |
| IHSQRRQDI      | HIV | Nef       | I |
| IATDIQTK       | HIV | Integrase | I |
| IILGLNKIV      | HIV | p24       | I |
| IILGLNKIVR     | HIV | p24       | I |
| IISLWDQSL      | HIV | gp160     | I |
| IKLEPVHGVY     | HIV | RT        | I |
| ILDWYIYHT      | HIV | Nef       | I |
| ILDWVYIYHT     | HIV | Nef       | I |
| ILGEPPTVL      | HIV | Rev       | I |
| ILGLNKIVR      | HIV | p24       | I |
| ILGLNKIVRMY    | HIV | p24       | I |
| ILIEICGHK      | HIV | Protease  | I |
| ILKDPVHGV      | HIV | RT        | I |
| ILKEPVHGV      | HIV | RT        | I |
| ILKEPVHGVY     | HIV | RT        | I |
| ILKLAGRWPK     | HIV | Integrase | I |
| ILRIPVHGV      | HIV | RT        | I |
| ILRSCNTSV      | HIV | gp160     | I |
| ILVESPAVL      | HIV | Rev       | I |

|                |     |           |   |
|----------------|-----|-----------|---|
| IPAETGQETA     | HIV | Integrase | I |
| IPHYCAPA       | HIV | gp160     | I |
| IPLGDAKLII     | HIV | Vif       | I |
| IPLGDARLVI     | HIV | Vif       | I |
| IPLTEEAEL      | HIV | RT        | I |
| IPRRIRQGA      | HIV | gp160     | I |
| IPRRIRQGF      | HIV | gp160     | I |
| IPRRIRQGL      | HIV | gp160     | I |
| IPRRRIRQGL     | HIV | gp160     | I |
| IPTRIRQGL      | HIV | gp160     | I |
| IPYNPQSQGVV    | HIV | Integrase | I |
| IPYNPQSQGW     | HIV | Integrase | I |
| IQQEFGIPY      | HIV | Integrase | I |
| IQQEFGIPYNPQ   | HIV | Integrase | I |
| IRDKVQKEY      | HIV | gp160     | I |
| IRLRPGGKK      | HIV | p17       | I |
| IRLRPGGKKK     | HIV | p17       | I |
| ISERILSTY      | HIV | Rev       | I |
| ISERILSTYL     | HIV | Rev       | I |
| ISGKAKGWF      | HIV | Vif       | I |
| ISKKAKGWF      | HIV | Vif       | I |
| ISLWDQSLK      | HIV | gp160     | I |
| ISPRTLNAW      | HIV | p24       | I |
| ISPRTLNAWV     | HIV | p24       | I |
| ISTERILSTY     | HIV | Rev       | I |
| ITKALGISY      | HIV | Tat       | I |
| ITKGLGISYGR    | HIV | Tat       | I |
| ITLWQRPLV      | HIV | Protease  | I |
| ITTESIVIW      | HIV | RT        | I |
| ITVGPQVIFY     | HIV | gp160     | I |
| IVGAETFYVDGAAN | HIV | RT        | I |
| IVGAETFYVDGAAS | HIV | RT        | I |
| IVLPEKDSW      | HIV | RT        | I |
| IVNRNRQGY      | HIV | gp160     | I |
| IVNRVRQGY      | HIV | gp160     | I |
| IVNRVRQGYSP    | HIV | gp160     | I |
| IVTDSQYAL      | HIV | RT        | I |
| IVTRIVELL      | HIV | gp160     | I |
| IVWASRELER     | HIV | p17       | I |
| IYETYGDTW      | HIV | Vpr       | I |
| IYIGPGRAF      | HIV | gp160     | I |
| IYKRWILG       | HIV | p24       | I |
| IYKRWILGL      | HIV | p24       | I |
| IYKRWILGLNK    | HIV | p24       | I |
| IYQEPFKNL      | HIV | RT        | I |
| IYQEPFKNLK     | HIV | RT        | I |
| IYQYMDDLIV     | HIV | RT        | I |
| IYSQKRQDI      | HIV | Nef       | I |
| KAACWWAGI      | HIV | Integrase | I |
| KAAFDLSTF      | HIV | Nef       | I |
| KAALDLSHF      | HIV | Nef       | I |
| KAALDLSHFL     | HIV | Nef       | I |
| KAADVLSHF      | HIV | Nef       | I |
| KAADVLSHFL     | HIV | Nef       | I |
| KAADVLSMFL     | HIV | Nef       | I |
| KAFSPEVIMPF    | HIV | p24       | I |
| KAFSPEVIMPF    | HIV | p24       | I |
| KAHDPEVHNWV    | HIV | gp160     | I |
| KALGPAATL      | HIV | p24       | I |
| KAPRKKGCW      | HIV | p2p7p1p6  | I |
| KAPRKKGCWK     | HIV | p2p7p1p6  | I |
| KAVRIKFLY      | HIV | Rev       | I |
| KAVRIKFLY      | HIV | Rev       | I |
| KAVRRLIKFLY    | HIV | Rev       | I |
| KAYDTEVHNWV    | HIV | gp160     | I |
| KAYETEVHNWV    | HIV | gp160     | I |
| KCGKEGHQMK     | HIV | p2p7p1p6  | I |
| KDTINEAAEWDR   | HIV | p24       | I |
| KEKGGLEGL      | HIV | Nef       | I |
| KEKGGLEGLVYSQK | HIV | Nef       | I |
| KELYPLASL      | HIV | p2p7p1p6  | I |
| KELYPLTSL      | HIV | p2p7p1p6  | I |
| KEPVHGVVY      | HIV | RT        | I |

|                |     |           |   |
|----------------|-----|-----------|---|
| KETINEEAA      | HIV | p24       | I |
| KEVHNWVAT      | HIV | gp160     | I |
| KGAFDLSFF      | HIV | Nef       | I |
| KGALDLSHF      | HIV | Nef       | I |
| KGFNPEVIPMF    | HIV | p24       | I |
| KHPGSQPKTA     | HIV | Tat       | I |
| KIAIRSENISNNA  | HIV | gp160     | I |
| KIATESIVIW     | HIV | p24       | I |
| KIEEQNKSK      | HIV | p17       | I |
| KIEELRQHL      | HIV | RT        | I |
| KIEELRQHLL     | HIV | RT        | I |
| KIKDYGKQM      | HIV | Integrase | I |
| KIKPPLPSV      | HIV | Vif       | I |
| KIKPPLPSVTK    | HIV | Vif       | I |
| KILYQSNPY      | HIV | Rev       | I |
| KIQNFRVYY      | HIV | Integrase | I |
| KIQNFRVYYR     | HIV | Integrase | I |
| KIRLRPGGK      | HIV | p17       | I |
| KIRLRPGGKK     | HIV | p17       | I |
| KIRLRPGGKKKYKL | HIV | p17       | I |
| KIRWIILGNK     | HIV | p24       | I |
| KITTESIVIW     | HIV | RT        | I |
| KIWPSYKGR      | HIV | p2p7p1p6  | I |
| KKQEILDWVY     | HIV | Nef       | I |
| KLKGAGYVT      | HIV | RT        | I |
| KLKGAGYVV      | HIV | RT        | I |
| KLNWASQIY      | HIV | RT        | I |
| KLPIWKETW      | HIV | RT        | I |
| KLTEDRWNK      | HIV | Vif       | I |
| KLTPLCVSL      | HIV | gp160     | I |
| KLTPLCVTL      | HIV | gp160     | I |
| KLTSNNTSV      | HIV | gp160     | I |
| KLVDFRELNK     | HIV | RT        | I |
| KLVGKLNWA      | HIV | RT        | I |
| KLWVTVYYGV     | HIV | gp160     | I |
| KMIGGIGGF      | HIV | Protease  | I |
| KMIGGIGGFI     | HIV | Protease  | I |
| KMSFEPPIH      | HIV | gp160     | I |
| KNCGEFFYCNS    | HIV | gp160     | I |
| KNCSFNMTT      | HIV | gp160     | I |
| KPCVKLTPL      | HIV | gp160     | I |
| KPCVKLTPLC     | HIV | gp160     | I |
| KPPLPSVKKL     | HIV | Vif       | I |
| KPPLPSVTKL     | HIV | Vif       | I |
| KPVVSTQLLL     | HIV | gp160     | I |
| KQNPDIYIY      | HIV | RT        | I |
| KQNPDIYIYQY    | HIV | RT        | I |
| KRKGIGGY       | HIV | Integrase | I |
| KRQDILDWYIY    | HIV | Nef       | I |
| KRQDILDWVY     | HIV | Nef       | I |
| KRQEILDW       | HIV | Nef       | I |
| KRQEILDWVY     | HIV | Nef       | I |
| KRWIILGNK      | HIV | p24       | I |
| KRWIILGGLNK    | HIV | p24       | I |
| KRWIILGNK      | HIV | p24       | I |
| KRWIILGNKIV    | HIV | p24       | I |
| KRWIILGNK      | HIV | p24       | I |
| KRWIIMGLHK     | HIV | p24       | I |
| KRWIIMGLNK     | HIV | p24       | I |
| KRWIIMGNK      | HIV | p24       | I |
| KRWILGNKIV     | HIV | p24       | I |
| KRWILGNKIVRMY  | HIV | p24       | I |
| KRWILLGNK      | HIV | p24       | I |
| KRYMIKHLV      | HIV | p17       | I |
| KSALDLSHF      | HIV | Nef       | I |
| KTAVQMAVF      | HIV | Integrase | I |
| KTGRLIKLLY     | HIV | Rev       | I |
| KTKPPLPSVKK    | HIV | Vif       | I |
| KTLPLCVTL      | HIV | gp160     | I |
| KTQAAAADK      | HIV | p17       | I |
| KTVKCFNCGR     | HIV | p2p7p1p6  | I |
| KTVRLIKFLY     | HIV | Rev       | I |
| KTVRLIKRLY     | HIV | Rev       | I |

|               |     |              |   |
|---------------|-----|--------------|---|
| KVIEVAQGA     | HIV | gp160        | I |
| KVRQYDQIL     | HIV | Protease     | I |
| KVVPRRKAK     | HIV | Integrase    | I |
| KVYLAWVPA     | HIV | RT           | I |
| KVYLAWVPAHK   | HIV | RT           | I |
| KWILGLNKIVRMY | HIV | p24          | I |
| KYCWNLLQY     | HIV | gp160        | I |
| KYKCLKHIVW    | HIV | p17          | I |
| KYLGSLVQY     | HIV | gp160        | I |
| KYLWNLLQY     | HIV | gp160        | I |
| KYMLKHIVW     | HIV | p17          | I |
| KYRLKHIVW     | HIV | p17          | I |
| KYRLKHLVW     | HIV | p17          | I |
| KYTAFTPSI     | HIV | RT           | I |
| KYWWNLLQY     | HIV | gp160        | I |
| LADQLHLHY     | HIV | Vif          | I |
| LAFHHVAREL    | HIV | Nef          | I |
| LAIVALVVA     | HIV | Vpu          | I |
| LARNCRAPRK    | HIV | p2p7p1p6     | I |
| LEKHGAITS     | HIV | Nef          | I |
| LEWRFD SRL    | HIV | Nef          | I |
| LFCASCAKAY    | HIV | gp160        | I |
| LFCASDAKAY    | HIV | gp160        | I |
| LFLDGIDKA     | HIV | RT-Integrase | I |
| LFNTVATLY     | HIV | p17          | I |
| LGLNKIVRMY    | HIV | p24          | I |
| LGLNKIVRMYS   | HIV | p24          | I |
| LGPGRVWYTT    | HIV | gp160        | I |
| LGVAPTTKRRWER | HIV | gp160        | I |
| LHPVHAGPI     | HIV | p24          | I |
| LKEPVHGVY     | HIV | RT           | I |
| LLDTGADDTVL   | HIV | Protease     | I |
| LLDTIAIAV     | HIV | gp160        | I |
| LLLYWGRELK    | HIV | gp160        | I |
| LLNATAIAV     | HIV | gp160        | I |
| LLNATDIAV     | HIV | gp160        | I |
| LLQLTVWGI     | HIV | gp160        | I |
| LLQYWSQEL     | HIV | gp160        | I |
| LLRAIEAQHHL   | HIV | gp160        | I |
| LLRWGLTTPDKK  | HIV | RT           | I |
| LLWKGEGAV     | HIV | Integrase    | I |
| LLWKGEGAW     | HIV | Integrase    | I |
| LPCRKQFINMWQE | HIV | gp160        | I |
| LPCRKQII      | HIV | gp160        | I |
| LPCRKWII      | HIV | gp160        | I |
| LPGRWKPKMI    | HIV | Protease     | I |
| LPLPLDRL      | HIV | Rev          | I |
| LPPIVAKEI     | HIV | Integrase    | I |
| LPPLDRLTL     | HIV | Rev          | I |
| LPPLERLTL     | HIV | Rev          | I |
| LPPVVAKEI     | HIV | Integrase    | I |
| LPQGWKGSPA    | HIV | RT           | I |
| LPQGWKGSPAI   | HIV | RT           | I |
| LQLPIERL      | HIV | Rev          | I |
| LQLPPLERL     | HIV | Rev          | I |
| LRAVRIKI      | HIV | Rev          | I |
| LRWGFC TPDKK  | HIV | RT           | I |
| LSEGATPQDL    | HIV | p24          | I |
| LSHFLKEKGGLEG | HIV | Nef          | I |
| LSPRTLNAW     | HIV | p24          | I |
| LTDTTNQKT     | HIV | RT           | I |
| LTEEALELE     | HIV | RT           | I |
| LTFGWCFKL     | HIV | Nef          | I |
| LTFGWCFKLV    | HIV | Nef          | I |
| LTFGWCYKL     | HIV | Nef          | I |
| LTFGWCYKLV    | HIV | Nef          | I |
| LVGKLNWASQIY  | HIV | RT           | I |
| LVGTPANI      | HIV | Protease     | I |
| LVGTPVNI      | HIV | Protease     | I |
| LVGTPVNII     | HIV | Protease     | I |
| LVILAIVALV    | HIV | Vpu          | I |
| LVQNSNPDCCK   | HIV | p24          | I |
| LVWASRELERF   | HIV | p17          | I |

|                |     |           |   |
|----------------|-----|-----------|---|
| LWVTVYGV       | HIV | gp160     | I |
| LYNTVATLY      | HIV | p17       | I |
| LYPLASLRSL     | HIV | p2p7p1p6  | I |
| MASDFNLPPV     | HIV | Integrase | I |
| MAVFIHFK       | HIV | Integrase | I |
| MGARASVLSG     | HIV | p17       | I |
| MGPKRAFYAT     | HIV | gp160     | I |
| MHEDIISLW      | HIV | gp160     | I |
| MKKGLGISYGR    | HIV | Tat       | I |
| MQMLKDTINEEAAE | HIV | p24       | I |
| MTKGLGISY      | HIV | Tat       | I |
| MTKILEPFR      | HIV | RT        | I |
| MTNPPPIV       | HIV | p24       | I |
| MTSNPPPIV      | HIV | p24       | I |
| MTYKAALDL      | HIV | Nef       | I |
| MTYKAAVDL      | HIV | Nef       | I |
| MVHQAISPR      | HIV | p24       | I |
| MVHQSMSPRILNAW | HIV | p24       | I |
| NAKTIHVL       | HIV | gp160     | I |
| NANPDCKTI      | HIV | p24       | I |
| NANPDCKTILRAL  | HIV | p24       | I |
| NANPDSKTI      | HIV | p24       | I |
| NAWVKIEEK      | HIV | p24       | I |
| NCGGEFFYCN     | HIV | gp160     | I |
| NCSFNISTI      | HIV | gp160     | I |
| NCYCKKCCF      | HIV | Tat       | I |
| NCYCKKCCY      | HIV | Tat       | I |
| NCYCKRCCF      | HIV | Tat       | I |
| NETPGIRYQY     | HIV | RT        | I |
| NFRGPKRIKCFNCG | HIV | p2p7p1p6  | I |
| NIWATHACV      | HIV | gp160     | I |
| NLQEQIGWM      | HIV | p24       | I |
| NLQEQIGWMT     | HIV | p24       | I |
| NLWVTVYGV      | HIV | gp160     | I |
| NMWQEVGKAM     | HIV | gp160     | I |
| NNETPGIRY      | HIV | RT        | I |
| NNETPGVRY      | HIV | RT        | I |
| NPDCCKTILRAL   | HIV | p24       | I |
| NPDIVIYQY      | HIV | RT        | I |
| NPDIVIYQYM     | HIV | RT        | I |
| NPDVILIQY      | HIV | RT        | I |
| NPEIYIYQY      | HIV | RT        | I |
| NPVPVGNII      | HIV | p24       | I |
| NRWQVMIVW      | HIV | Vif       | I |
| NSGGEFFYSNS    | HIV | gp160     | I |
| NSNPDCCKTIL    | HIV | p24       | I |
| NSSKVSQNY      | HIV | p17       | I |
| NSSQVSQNY      | HIV | p17       | I |
| NSSQVSQNYP     | HIV | p17-p24   | I |
| NTMLNTVGGHQAAM | HIV | p24       | I |
| NTPPLVKLW      | HIV | RT        | I |
| NTPVFAIKK      | HIV | RT        | I |
| NTPVFAIKKK     | HIV | RT        | I |
| NTVATLYCV      | HIV | p17       | I |
| NVTENFMW       | HIV | gp160     | I |
| NVWATHACV      | HIV | gp160     | I |
| NWRSELYKY      | HIV | gp160     | I |
| NYTPGPGVRY     | HIV | Nef       | I |
| NYTPGPGVRYPLT  | HIV | Nef       | I |
| PDCKTILKA      | HIV | p24       | I |
| PFDDYVDRF      | HIV | p24       | I |
| PFDDYVDRFF     | HIV | p24       | I |
| PGGKKRYRLKHL   | HIV | p17       | I |
| PGMDGPKVKQ     | HIV | RT        | I |
| PIPVGDIYK      | HIV | p24       | I |
| PIKETWEAW      | HIV | RT        | I |
| PIKETWETW      | HIV | RT        | I |
| PIVLEKDSW      | HIV | RT        | I |
| PKTACTNCY      | HIV | Tat       | I |
| PLDEFRKY       | HIV | RT        | I |
| PLTFGWCFKL     | HIV | Nef       | I |
| PLTFGWICYK     | HIV | Nef       | I |
| PLTFGWICYKL    | HIV | Nef       | I |

|               |     |            |   |
|---------------|-----|------------|---|
| PLTFGWICYKLV  | HIV | Nef        | I |
| PLTSLKSLFGS   | HIV | p2p7p1p6   | I |
| PLVKLWYQL     | HIV | RT         | I |
| PMFTALSEGAT   | HIV | p24        | I |
| PNCGGEFFY     | HIV | gp160      | I |
| PPIPVGDH      | HIV | p24        | I |
| PPIPVGDY      | HIV | p24        | I |
| PPIPVGEIY     | HIV | p24        | I |
| PPQGSQTHQV    | HIV | Tat        | I |
| PPSGKGGNY     | HIV | p2p7p1p6   | I |
| PPVPVGDY      | HIV | p24        | I |
| PQDLNTMLN     | HIV | p24        | I |
| PQDLNTMLNTV   | HIV | p24        | I |
| PQVPLRPMTY    | HIV | Nef        | I |
| PSSGGLEITTHSF | HIV | gp160      | I |
| PTDPNPQEI     | HIV | gp160      | I |
| PTPVNIHGRNL   | HIV | Protease   | I |
| PTRRELQVW     | HIV | Gag_Pol_TF | I |
| PTSRELQVW     | HIV | Gag_Pol_TF | I |
| PTVLESGTKE    | HIV | Rev        | I |
| PVDPRLEPW     | HIV | Tat        | I |
| PVGDYKRWII    | HIV | p24        | I |
| PVPFQLPPL     | HIV | Rev        | I |
| QAISPRTLNAV   | HIV | p24        | I |
| QAISPRTLNAW   | HIV | p24        | I |
| QASGEVKNW     | HIV | p24        | I |
| QASKEVKNWV    | HIV | p24        | I |
| QASQEVKNW     | HIV | p24        | I |
| QATQDVKNW     | HIV | p24        | I |
| QATQEVKGW     | HIV | p24        | I |
| QATQEVKNM     | HIV | p24        | I |
| QATQEVKNW     | HIV | p24        | I |
| QATWIPEWEF    | HIV | RT         | I |
| QDILDWY       | HIV | Nef        | I |
| QEEHEKYHSNW   | HIV | Integrase  | I |
| QEILDWVY      | HIV | Nef        | I |
| QELKNSAVSL    | HIV | gp160      | I |
| QELLALDKW     | HIV | gp160      | I |
| QEPIDKELY     | HIV | p2p7p1p6   | I |
| QFRNKTIWF     | HIV | gp160      | I |
| QGVGGPGHKARVL | HIV | p24        | I |
| QGWKGSPI      | HIV | RT         | I |
| QGYFPDWQNY    | HIV | Nef        | I |
| QIIEQLIKK     | HIV | RT         | I |
| QILEQLQPA     | HIV | p17        | I |
| QILEQLQPAL    | HIV | p17        | I |
| QILGEPPTV     | HIV | Rev        | I |
| QIRSLSGWIL    | HIV | Rev        | I |
| QIRTYSGWI     | HIV | Rev        | I |
| QIYAGIKVK     | HIV | RT         | I |
| QIYPGKVK      | HIV | RT         | I |
| QIYPGKVR      | HIV | RT         | I |
| QIYQEPFKNLK   | HIV | RT         | I |
| QIYQEPFKNLKTG | HIV | RT         | I |
| QLDCTHLEGK    | HIV | Integrase  | I |
| QLPPLERLT     | HIV | Rev        | I |
| QLQPSLQTGS    | HIV | p17        | I |
| QLTEAVQKI     | HIV | RT         | I |
| QMAVFIHNFK    | HIV | Integrase  | I |
| QMHEDIISL     | HIV | gp160      | I |
| QMQEDIISL     | HIV | gp160      | I |
| QMVHQAISPR    | HIV | p24        | I |
| QPDKSESELV    | HIV | RT         | I |
| QPIQIAIAAL    | HIV | Vpu        | I |
| QPKTACTTCY    | HIV | Tat        | I |
| QPKTPCNKCY    | HIV | Tat        | I |
| QRGWEVLKY     | HIV | gp160      | I |
| QRPLVTIKI     | HIV | Protease   | I |
| QRPLVTVKIG    | HIV | Protease   | I |
| QRQRQIQL      | HIV | Rev        | I |
| QRRQDILD      | HIV | Nef        | I |
| QTDPAVKNWM    | HIV | p24        | I |
| QTKGLGISY     | HIV | Tat        | I |

|                |     |           |   |
|----------------|-----|-----------|---|
| QTRVLAIERYL    | HIV | gp160     | I |
| QVLGESPTVL     | HIV | Rev       | I |
| QVPLRPMTY      | HIV | Nef       | I |
| QVPLRPMTYK     | HIV | Nef       | I |
| QVPLRPMTYKA    | HIV | Nef       | I |
| QVPLRPMTYK     | HIV | Nef       | I |
| QVPLRRMTYK     | HIV | Nef       | I |
| QVRDQAEHL      | HIV | Integrase | I |
| QVSQNYPIV      | HIV | p17-p24   | I |
| QYDDAVYKL      | HIV | Protease  | I |
| QYDQIPIEI      | HIV | Protease  | I |
| RAEPAADGV      | HIV | Nef       | I |
| RAEQASQEV      | HIV | p24       | I |
| RAEQASQEVK     | HIV | p24       | I |
| RAEQATQDVKN    | HIV | p24       | I |
| RAFSPEVIP      | HIV | p24       | I |
| RAIEAQQHL      | HIV | gp160     | I |
| RAIEAQQHM      | HIV | gp160     | I |
| RAIEAQQHML     | HIV | gp160     | I |
| RAIEAQQWQ      | HIV | gp160     | I |
| RAIEVQQHL      | HIV | gp160     | I |
| RALGPGATL      | HIV | p24       | I |
| RALGPGATL/M    | HIV | p24       | I |
| RAMASDFNL      | HIV | Integrase | I |
| RAPRKKGCW      | HIV | p2p7p1p6  | I |
| RAVGMGALIFEFL  | HIV | gp160     | I |
| RAYRAILHI      | HIV | gp160     | I |
| RCSSNITGLL     | HIV | gp160     | I |
| RDYVDRFFKTL    | HIV | p24       | I |
| RDYVDRFYKTL    | HIV | p24       | I |
| REHLLKWGF      | HIV | RT        | I |
| REPHNEWTL      | HIV | Vpr       | I |
| REPYNNEWTL     | HIV | Vpr       | I |
| RETKLGKAGY     | HIV | RT        | I |
| RFVNPGLL       | HIV | p17       | I |
| RGPGRAFVTI     | HIV | gp160     | I |
| RGPGRAFYT      | HIV | gp160     | I |
| RGRQKVVPL      | HIV | RT        | I |
| RIDVKDTKEAL    | HIV | p17       | I |
| RIGCRHSRIGV    | HIV | Vpr       | I |
| RIGPGQTFY      | HIV | gp160     | I |
| RIKPLPSVTK     | HIV | Vif       | I |
| RIKQFINMW      | HIV | gp160     | I |
| RIKQIINMW      | HIV | gp160     | I |
| RILQQLLFI      | HIV | Vpr       | I |
| RILSTYLGR      | HIV | Rev       | I |
| RIRQGLERA      | HIV | gp160     | I |
| RIRTWKSLVK     | HIV | Vif       | I |
| RKAKIKDY       | HIV | Integrase | I |
| RKAKIIRDY      | HIV | Integrase | I |
| RKNYQHLWK      | HIV | gp160     | I |
| RLAFHHMAR      | HIV | Nef       | I |
| RLAFHHVAR      | HIV | Nef       | I |
| RLAFHHVARELHPE | HIV | Nef       | I |
| RLHPVHAGPIA    | HIV | p24       | I |
| RLISCNTSV      | HIV | gp160     | I |
| RLLNAWVKV      | HIV | p24       | I |
| RLRDLLLIV      | HIV | gp160     | I |
| RLRDLLLIVTR    | HIV | gp160     | I |
| RLRPGGKKHY     | HIV | p17       | I |
| RLRPGGKKHYM    | HIV | p17       | I |
| RLRPGGKKK      | HIV | p17       | I |
| RLRPGGKKKK     | HIV | p17       | I |
| RLRPGGKKKKY    | HIV | p17       | I |
| RLRPGGKKKY     | HIV | p17       | I |
| RLRPGGKKKYK    | HIV | p17       | I |
| RLRPGGKKRYRL   | HIV | p17       | I |
| RLRQGGKKK      | HIV | p17       | I |
| RLSYNTVATLY    | HIV | p17       | I |
| RLVNGSLAL      | HIV | gp160     | I |
| RLVSGFLAL      | HIV | gp160     | I |
| RMRGAHTNDV     | HIV | RT        | I |
| RMRGAHTNDVK    | HIV | RT        | I |

|              |     |              |   |
|--------------|-----|--------------|---|
| RMRRAEPA     | HIV | Nef          | I |
| RMYSPTSIL    | HIV | p24          | I |
| RMYSPPVIL    | HIV | p24          | I |
| RPAELVLQL    | HIV | Rev          | I |
| RPAEPVPLQL   | HIV | Rev          | I |
| RPEPTAPPA    | HIV | p2p7p1p6     | I |
| RPGGKKKKYK   | HIV | p17          | I |
| RPGGKKKYKL   | HIV | p17          | I |
| RPGGKKKYML   | HIV | p17          | I |
| RPGGKKRYKL   | HIV | p17          | I |
| RPGGKKRYM    | HIV | p17          | I |
| RPIVSTQLL    | HIV | gp160        | I |
| RPMTYKAAL    | HIV | Nef          | I |
| RPMTYKAAV    | HIV | Nef          | I |
| RPMTYKGAL    | HIV | Nef          | I |
| RPNNTTRKS    | HIV | gp160        | I |
| RPNNTTRKSI   | HIV | gp160        | I |
| RPNNTTRRGI   | HIV | gp160        | I |
| RPQVPLRPM    | HIV | Nef          | I |
| RPQVPLRPM    | HIV | Nef          | I |
| RPQVPLRPMTY  | HIV | Nef          | I |
| RPRPGGKKK    | HIV | p17          | I |
| RPVVSTQLL    | HIV | gp160        | I |
| RPVVSTQLLL   | HIV | gp160        | I |
| RPYNNTRQS    | HIV | gp160        | I |
| RQANFLGKI    | HIV | p2p7p1p6     | I |
| RQDILDWI     | HIV | Nef          | I |
| RQDILDWIY    | HIV | Nef          | I |
| RQDILDWV     | HIV | Nef          | I |
| RQDILDWVY    | HIV | Nef          | I |
| RQGLERALL    | HIV | gp160        | I |
| RQYDQILIEI   | HIV | Protease     | I |
| RQYDQIPIEI   | HIV | Protease     | I |
| RRGWEVLKY    | HIV | gp160        | I |
| RRIRQGLERILL | HIV | gp160        | I |
| RRKPLPSIAK   | HIV | Vif          | I |
| RRQDILDWI    | HIV | Nef          | I |
| RRQDILDWIY   | HIV | Nef          | I |
| RRQDILDWVY   | HIV | Nef          | I |
| RRWQLGLQK    | HIV | p24          | I |
| RSAPVPLQL    | HIV | Rev          | I |
| RSIRLVSGFL   | HIV | gp160        | I |
| RSLFNTVATLY  | HIV | p17          | I |
| RSLYNTATLY   | HIV | p17          | I |
| RSLYNTVATLY  | HIV | p17          | I |
| RSLYNTVAVLY  | HIV | p17          | I |
| RTLNAWVKV    | HIV | p24          | I |
| RTRGAHTNDVK  | HIV | RT           | I |
| RTVRLIKLLY   | HIV | Rev          | I |
| RVIEVAQRV    | HIV | gp160        | I |
| RVIEVLQRA    | HIV | gp160        | I |
| RVKEYQHL     | HIV | gp160        | I |
| RVLAEAMSQV   | HIV | p24-p2p7p1p6 | I |
| RVLKQVTEK    | HIV | gp160        | I |
| RVYLSWVPAHK  | HIV | RT           | I |
| RWILGLNK     | HIV | p24          | I |
| RYLKDQQLL    | HIV | gp160        | I |
| RYLRDQQLL    | HIV | gp160        | I |
| RYLRDQQLLGI  | HIV | gp160        | I |
| RYPLTFGWCF   | HIV | Nef          | I |
| RYPLTFGWCFY  | HIV | Nef          | I |
| RYPLTFGWCFY  | HIV | Nef          | I |
| RYPLTFGWCFYK | HIV | Nef          | I |
| SAAVKAACWW   | HIV | Integrase    | I |
| SAEPVPLQL    | HIV | Rev          | I |
| SEGATPQDL    | HIV | p24          | I |
| SEGCRIQILG   | HIV | p17          | I |
| SEVNIVTDSQY  | HIV | RT           | I |
| SEWILSTHL    | HIV | Rev          | I |
| SFDPIPIHY    | HIV | gp160        | I |
| SFEPIPIHY    | HIV | gp160        | I |
| SFNCGGEFF    | HIV | gp160        | I |
| SFNCGGEFFY   | HIV | gp160        | I |

|               |     |              |   |
|---------------|-----|--------------|---|
| SFNCRGEFFY    | HIV | gp160        | I |
| SFTCGGEFF     | HIV | gp160        | I |
| SHFLKEKGGLEGL | HIV | Nef          | I |
| SIFQSSMTK     | HIV | RT           | I |
| SILDIRQGP     | HIV | p24          | I |
| SKRIVKCFNCG   | HIV | p2p7p1p6     | I |
| SLAFRHVAR     | HIV | Nef          | I |
| SLFNTVATL     | HIV | p17          | I |
| SLFNTVATLY    | HIV | p17          | I |
| SLGQHIYET     | HIV | Vpr          | I |
| SLLNATAIAV    | HIV | gp160        | I |
| SLLNATDIAV    | HIV | gp160        | I |
| SLVKHHMYI     | HIV | Vif          | I |
| SLVKHHMYV     | HIV | Vif          | I |
| SLWDQSLKP     | HIV | gp160        | I |
| SLYNIVATLWCVH | HIV | p17          | I |
| SLYNTAVTL     | HIV | p17          | I |
| SLYNTIATL     | HIV | p17          | I |
| SLYNTVAAL     | HIV | p17          | I |
| SLYNTVATL     | HIV | p17          | I |
| SLYNTVATLY    | HIV | p17          | I |
| SLYNTVAVL     | HIV | p17          | I |
| SPAIFQSSM     | HIV | RT           | I |
| SPAIFQSSMT    | HIV | RT           | I |
| SPHPRISSEV    | HIV | Vif          | I |
| SPIETVPVKL    | HIV | RT           | I |
| SPRTLNAWV     | HIV | p24          | I |
| SPRTLNAWVKV   | HIV | p24          | I |
| SPSIFQSSM     | HIV | RT           | I |
| SQKQEIDK      | HIV | p2p7p1p6     | I |
| SQVTNSATI     | HIV | p2p7p1p6     | I |
| SRAKWNNTL     | HIV | gp160        | I |
| SRKAKGWFY     | HIV | Vif          | I |
| STGIRRVFL     | HIV | RT-Integrase | I |
| STLQEIAW      | HIV | p24          | I |
| STLQEIGW      | HIV | p24          | I |
| STLQEIGWM     | HIV | p24          | I |
| STTVKAACW     | HIV | Integrase    | I |
| STTVKAACWV    | HIV | Integrase    | I |
| STWNVNGTW     | HIV | gp160        | I |
| SVITQACPK     | HIV | gp160        | I |
| SVLSGGQLDR    | HIV | p17          | I |
| SVPLDEFRK     | HIV | RT           | I |
| SVPLRPMTYK    | HIV | Nef          | I |
| SYHRLRDLIVTR  | HIV | gp160        | I |
| SYRRLRDL      | HIV | gp160        | I |
| SYVDRFYKSL    | HIV | p24          | I |
| TACNKCHCK     | HIV | Tat          | I |
| TACNNCYCK     | HIV | Tat          | I |
| TACNNCYCKK    | HIV | Tat          | I |
| TAVPWNASW     | HIV | gp160        | I |
| TAVPWNSW      | HIV | gp160        | I |
| TELQAIQLAL    | HIV | RT           | I |
| THLEGGKIL     | HIV | Integrase    | I |
| THLEGGKIL     | HIV | Integrase    | I |
| TIKIGGQLK     | HIV | Protease     | I |
| TINEEAAEW     | HIV | p24          | I |
| TKALGISYGR    | HIV | Tat          | I |
| TKIQNFRVYY    | HIV | Integrase    | I |
| TLEILEELKN    | HIV | Vpr          | I |
| TLFCASDAK     | HIV | gp160        | I |
| TLGPGRVLY     | HIV | gp160        | I |
| TLNAWVKLV     | HIV | p24          | I |
| TLNAWVKVI     | HIV | p24          | I |
| TLNAWVKV      | HIV | p24          | I |
| TLNFPISPI     | HIV | Protease-RT  | I |
| TLQEIGWM      | HIV | p24          | I |
| TLRAEQATQD    | HIV | p24          | I |
| TLSQIVTKL     | HIV | gp160        | I |
| TLTSCNTSV     | HIV | gp160        | I |
| TLYCVHQKI     | HIV | p17          | I |
| TLYCVHQRI     | HIV | p17          | I |
| TMGAASITL     | HIV | gp160        | I |

|                |     |            |   |
|----------------|-----|------------|---|
| TNSANIMMQR     | HIV | p2p7p1p6   | I |
| TNVPWNSSW      | HIV | gp160      | I |
| TPGPGIRYPL     | HIV | Nef        | I |
| TPGPGRFPL      | HIV | Nef        | I |
| TPGPGTRYPL     | HIV | Nef        | I |
| TPGPGVKYPL     | HIV | Nef        | I |
| TPGPGVRYYP     | HIV | Nef        | I |
| TPGPGVRYPL     | HIV | Nef        | I |
| TPKKIKPPL      | HIV | Vif        | I |
| TPPLVKLWYQL    | HIV | RT         | I |
| TPQDLNMML      | HIV | p24        | I |
| TPQDLNMMLN     | HIV | p24        | I |
| TPQDLNQML      | HIV | p24        | I |
| TPQDLNQMLNTV   | HIV | p24        | I |
| TPQDLNTML      | HIV | p24        | I |
| TPQDLNTMLN     | HIV | p24        | I |
| TPQDLNTMLNT    | HIV | p24        | I |
| TPQVPLRPM      | HIV | Nef        | I |
| TPQVPLRPMTY    | HIV | Nef        | I |
| TPSQKQEP       | HIV | p2p7p1p6   | I |
| TPVNIGRNML     | HIV | Protease   | I |
| TPYDINQML      | HIV | p24        | I |
| TQGYFPDWQNY    | HIV | Nef        | I |
| TQGYFPDWQNYT   | HIV | Nef        | I |
| TQICGTLNF      | HIV | Protease   | I |
| TQIGCTLNF      | HIV | Protease   | I |
| TQMNWPNLWK     | HIV | gp160      | I |
| TRANSPTRR      | HIV | Gag_Pol_TF | I |
| TRYPLTFGW      | HIV | Nef        | I |
| TSTLQEQIAW     | HIV | p24        | I |
| TSTLQEQIGN     | HIV | p24        | I |
| TSTLQEQIGW     | HIV | p24        | I |
| TSTLQEQIGWF    | HIV | p24        | I |
| TSTLQEQVGW     | HIV | p24        | I |
| TSTLQRQIGW     | HIV | p24        | I |
| TSTPQEQIGW     | HIV | p24        | I |
| TSTVEEQIQW     | HIV | p24        | I |
| TSTVEEQQIW     | HIV | p24        | I |
| TTLFCASDAK     | HIV | gp160      | I |
| TTPDKKHQKE     | HIV | RT         | I |
| TTVPWNVSW      | HIV | gp160      | I |
| TVLDVGDAY      | HIV | RT         | I |
| TVLDVGDYI      | HIV | RT         | I |
| TVRERMRA       | HIV | Nef        | I |
| TVRLIKFLY      | HIV | Rev        | I |
| TVYYGVPVW      | HIV | gp160      | I |
| TVYYGVPVWK     | HIV | gp160      | I |
| TWAGVEAIRI     | HIV | Vpr        | I |
| TWAVEAIRI      | HIV | Vpr        | I |
| TWETWWTEYW     | HIV | RT         | I |
| TYNETYNEI      | HIV | gp160      | I |
| TYQIQEPF       | HIV | RT         | I |
| VAEGTDRVIEI    | HIV | gp160      | I |
| VASCDKQCQL     | HIV | Integrase  | I |
| VCFITKALGI     | HIV | Tat        | I |
| VCFMTKGLGI     | HIV | Tat        | I |
| VCFTTKGLGI     | HIV | Tat        | I |
| VDRFYKLTAEQAS  | HIV | p24        | I |
| VDRFYKTLAEQAS  | HIV | p24        | I |
| VERYLKDQQL     | HIV | gp160      | I |
| VEWPAVRERM     | HIV | Nef        | I |
| VFAVLSIVNR     | HIV | gp160      | I |
| VGEIYKRWIIGLNK | HIV | p24        | I |
| VGFVPRPQV      | HIV | Nef        | I |
| VGFPVTPQVPLRMT | HIV | Nef        | I |
| VGGPGHKARVL    | HIV | p24        | I |
| VHPVHAGPIA     | HIV | p24        | I |
| VHQAISPRTL     | HIV | p24        | I |
| VINVRQGY       | HIV | gp160      | I |
| VIVQYMDDL      | HIV | RT         | I |
| VIIQYMDDL      | HIV | RT         | I |
| VIIQYMMDL      | HIV | RT         | I |
| VIIQYNDDL      | HIV | RT         | I |

|                  |     |              |   |
|------------------|-----|--------------|---|
| VKNWMTETL        | HIV | p24          | I |
| VKNWMTETLL       | HIV | p24          | I |
| VKNWMTETLLV      | HIV | p24          | I |
| VKVIEEKAF        | HIV | p24          | I |
| VKVVEEKAF        | HIV | p24          | I |
| VLAEAMSQA        | HIV | p24-p2p7p1p6 | I |
| VLAEAMSQV        | HIV | p24-p2p7p1p6 | I |
| VLAEAMSQVT       | HIV | p24-p2p7p1p6 | I |
| VLALERYLKDQQL    | HIV | gp160        | I |
| VLDVGDAYFSV      | HIV | RT           | I |
| VLEWRFSRL        | HIV | Nef          | I |
| VLMWKFDSRL       | HIV | Nef          | I |
| VLVGPVNI         | HIV | Protease     | I |
| VLYCVHORI        | HIV | p17          | I |
| VNGFLALAW        | HIV | gp160        | I |
| VNIVDSQYA        | HIV | RT           | I |
| VPLDEDFRKY       | HIV | RT           | I |
| VPLDEGFRKY       | HIV | RT           | I |
| VPLDKDFRKY       | HIV | RT           | I |
| VPLRPMTYK        | HIV | Nef          | I |
| VPLTREAEL        | HIV | RT           | I |
| VPRRKAKII        | HIV | Integrase    | I |
| VPRRKVKII        | HIV | Integrase    | I |
| VPTDPNPEV        | HIV | gp160        | I |
| VPVEPEKVEEA      | HIV | Nef          | I |
| VPVWKEAKTTL      | HIV | gp160        | I |
| VPVWKEATT        | HIV | gp160        | I |
| VPVWKEATTT       | HIV | gp160        | I |
| VPVWKEATTTL      | HIV | gp160        | I |
| VQHAI SPRTLN AWV | HIV | p24          | I |
| VQANANPDCK       | HIV | p24          | I |
| VQNLQGQMV        | HIV | p24          | I |
| VQNSNPDCCK       | HIV | p24          | I |
| VQRTCRAIL        | HIV | gp160        | I |
| VQYWGLELK        | HIV | gp160        | I |
| VRHFPRWL         | HIV | Vpr          | I |
| VRMYSPVSI        | HIV | p24          | I |
| VRQYDQPIEI       | HIV | Protease     | I |
| VRYPITFGW        | HIV | Nef          | I |
| VSFEPIPIH        | HIV | gp160        | I |
| VSFEPIPIHY       | HIV | gp160        | I |
| VSFEPIPHYCA      | HIV | gp160        | I |
| VSGFLALAW        | HIV | gp160        | I |
| VSKKAKGWI        | HIV | Vif          | I |
| VTDSQYALGI       | HIV | RT           | I |
| VTEEFNMWK        | HIV | gp160        | I |
| VTENFNMWK        | HIV | gp160        | I |
| VTENFNMWKN       | HIV | gp160        | I |
| VTIKIGGQLK       | HIV | Protease     | I |
| VTILIGGQLK       | HIV | Protease     | I |
| VTKLTEDRW        | HIV | Vif          | I |
| VTVYGVVW         | HIV | gp160        | I |
| VTVYGVVWVK       | HIV | gp160        | I |
| VTVYGVVWVR       | HIV | gp160        | I |
| VVAIIAIV         | HIV | Vpu          | I |
| VWKDAETTLF       | HIV | gp160        | I |
| VWKEAKTTLF       | HIV | gp160        | I |
| VWKEATTTLF       | HIV | gp160        | I |
| VYHTQGYFPDWQNY   | HIV | Nef          | I |
| VYYDPSKDL        | HIV | RT           | I |
| VYYGVVWKEA       | HIV | gp160        | I |
| WASRELERF        | HIV | p17          | I |
| WETWMDYW         | HIV | RT           | I |
| WHLGHGVS         | HIV | Vif          | I |
| WHLGHVSI         | HIV | Vif          | I |
| WHLGGVSI         | HIV | Vif          | I |
| WYHTQGYF         | HIV | Nef          | I |
| WYHTQGYFPDWQ     | HIV | Nef          | I |
| WKFDSRLAF        | HIV | Nef          | I |
| WKGPAKLLW        | HIV | Integrase    | I |
| WKGSPAIFQSSMT    | HIV | RT           | I |
| WPKMIGGI         | HIV | Protease     | I |
| WLWYIKIFI        | HIV | gp160        | I |

|                   |     |           |    |
|-------------------|-----|-----------|----|
| WLWYIRIFI         | HIV | gp160     | I  |
| WMTNNPIPV         | HIV | p24       | I  |
| WVDPRLPEW         | HIV | Tat       | I  |
| WQEVGKAMY         | HIV | gp160     | I  |
| WRFDSRLAF         | HIV | Nef       | I  |
| WRFDSRLAFH        | HIV | Nef       | I  |
| WRFDSRLAHH        | HIV | Nef       | I  |
| WSKSSIGW          | HIV | Nef       | I  |
| WYIKIFIMI         | HIV | gp160     | I  |
| WYIKIFIMI         | HIV | gp160     | I  |
| WYIRIFIMI         | HIV | gp160     | I  |
| YCAPAGFAIL        | HIV | gp160     | I  |
| YCVHAGIEVRD       | HIV | p17       | I  |
| YETEVHNVW         | HIV | gp160     | I  |
| YFPDWQDYT         | HIV | Nef       | I  |
| YFPDWQNYT         | HIV | p24       | I  |
| YHTQGYFPDW        | HIV | Nef       | I  |
| YHTQGYFPDWQ       | HIV | Nef       | I  |
| YIEAEVIPA         | HIV | Integrase | I  |
| YIKIFIMIV         | HIV | gp160     | I  |
| YKGDLSHFL         | HIV | Nef       | I  |
| YKVVKIEPL         | HIV | gp160     | I  |
| YLAWVPAHK         | HIV | RT        | I  |
| YLGGEPEV          | HIV | Rev       | I  |
| YLPTFGWCY         | HIV | Nef       | I  |
| YLRDQQLGIWGC      | HIV | gp160     | I  |
| YNIVATLWCVHQ      | HIV | p17       | I  |
| YPGKVKQL          | HIV | RT        | I  |
| YPGKVRQL          | HIV | RT        | I  |
| YPIGKVRQL         | HIV | RT        | I  |
| YPLASLRS          | HIV | p2p7p1p6  | I  |
| YPLASLRSF         | HIV | p2p7p1p6  | I  |
| YPLTFGWCF         | HIV | Nef       | I  |
| YPLTFGWCY         | HIV | Nef       | I  |
| YPLTSLRSL         | HIV | p2p7p1p6  | I  |
| YPLTSLRSF         | HIV | p2p7p1p6  | I  |
| YQYMDLIV          | HIV | RT        | I  |
| YRLGVGALI         | HIV | Vpu       | I  |
| YRLINCNTSV        | HIV | gp160     | I  |
| YSENSSEYY         | HIV | gp160     | I  |
| YSPLSLQTL         | HIV | gp160     | I  |
| YTAFTIPSI         | HIV | RT        | I  |
| YTAFTIPSV         | HIV | RT        | I  |
| YTPGPGIRY         | HIV | Nef       | I  |
| YTPGPGTRY         | HIV | Nef       | I  |
| YTPGPGVRY         | HIV | Nef       | I  |
| YVDRFFKAL         | HIV | p24       | I  |
| YVDRFFKRL         | HIV | p24       | I  |
| YVDRFFKTL         | HIV | p24       | I  |
| YVDRFYKTL         | HIV | p24       | I  |
| AIRHIPRRIRQGLER   | HIV | gp160     | II |
| APPIGGQISCSNITY   | HIV | gp160     | II |
| ASLWNWFNITNWLWY   | HIV | gp160     | II |
| AVLSIVNVRQGYSPLSF | HIV | gp160     | II |
| CNISRAQWNTLEQI    | HIV | gp160     | II |
| CRKIQINMWQEVGR    | HIV | gp160     | II |
| CSGKLICTTAVP      | HIV | gp160     | II |
| CTTAVPWNASWS      | HIV | gp160     | II |
| CVKLTPLCVTLECRN   | HIV | gp160     | II |
| CVPTDPNPQEVV      | HIV | gp160     | II |
| DMRDNRSELYKYKV    | HIV | gp160     | II |
| DRVIEVVGQAYRAIR   | HIV | gp160     | II |
| DRVIEVVGQAYRAIR   | HIV | gp160     | II |
| EESQNQEKNEQELL    | HIV | gp160     | II |
| EFFYCNTTQLFNNTW   | HIV | gp160     | II |
| EIDNYTNTIYTLLEC   | HIV | gp160     | II |
| ELYKYKVVEIKPLGV   | HIV | gp160     | II |
| EMVNMWQEDVISLWD   | HIV | gp160     | II |
| ENFNMWKNEMVNMWQ   | HIV | gp160     | II |
| ENVTENFMWKNEMV    | HIV | gp160     | II |
| EQIWNHTTWMEWDRE   | HIV | gp160     | II |
| EQRGPGRFAFTIGKI   | HIV | gp160     | II |
| ETFRPGGDMRNWR     | HIV | gp160     | II |

|                    |     |       |    |
|--------------------|-----|-------|----|
| EVVIRSANFTDNAKT    | HIV | gp160 | II |
| FAILKCNK           | HIV | gp160 | II |
| FDPIPIHYCTPAGYA    | HIV | gp160 | II |
| FINMWQEVGKAMYAPP   | HIV | gp160 | II |
| FNNTWRLNHTEGTKGC   | HIV | gp160 | II |
| FRPGGDMRDNWRSEL    | HIV | gp160 | II |
| FYRLDIVPLTKNYS     | HIV | gp160 | II |
| GATTLFCASDAKAY     | HIV | gp160 | II |
| GIEEGGERDRDR       | HIV | gp160 | II |
| GIRPIVSTQLLNGSC    | HIV | gp160 | II |
| GIVQQNNLLRAIEA     | HIV | gp160 | II |
| GIWGCSGKLI         | HIV | gp160 | II |
| GIWGCSGKLIC        | HIV | gp160 | II |
| GNSNNESEIFRPGGG    | HIV | gp160 | II |
| GRAFVTIGKIGNMRQ    | HIV | gp160 | II |
| GSNNTVGNPILPCRI    | HIV | gp160 | II |
| HEDIISLWDQSLK      | HIV | gp160 | II |
| HIPRRIRQGLERILL    | HIV | gp160 | II |
| IGGQIRCSSN         | HIV | gp160 | II |
| IISLWDQSLKPC       | HIV | gp160 | II |
| IKLFIMIVGGLVGLR    | HIV | gp160 | II |
| INCNTSAITQACPKV    | HIV | gp160 | II |
| INMWQEVGKAMYAPP    | HIV | gp160 | II |
| IQRGPGRAFVTIGKIGN  | HIV | gp160 | II |
| ITIPCRKQIINMWQ     | HIV | gp160 | II |
| KNCSFNISTSIRGKV    | HIV | gp160 | II |
| KQFINMWQEVGKAMYA   | HIV | gp160 | II |
| KYKVIKIEPLGIAPTC   | HIV | gp160 | II |
| LELDK WASLWNWFNITN | HIV | gp160 | II |
| LGIWGCSGKLIC       | HIV | gp160 | II |
| LPRIKQIINMWQEVY    | HIV | gp160 | II |
| MWQEVGKAMYAPPICG   | HIV | gp160 | II |
| MYAPPKIGNITCKSN    | HIV | gp160 | II |
| NAKTIIVQLNESVAIC   | HIV | gp160 | II |
| NATTVVRDRKQTVYA    | HIV | gp160 | II |
| NCSFNATTVVRDRDQ    | HIV | gp160 | II |
| NESVAINCT          | HIV | gp160 | II |
| NKTFNGKGPCNTNVSTY  | HIV | gp160 | II |
| PAGFAILKCNKNTFN    | HIV | gp160 | II |
| PAGFAILKCNKNTFNY   | HIV | gp160 | II |
| PEIVTHSFNCGGEFF    | HIV | gp160 | II |
| PIHYCAPAGFAILK     | HIV | gp160 | II |
| PIKGNITCKSNITGL    | HIV | gp160 | II |
| PKVTFDPIPIHYCTP    | HIV | gp160 | II |
| PPISGQIRCS         | HIV | gp160 | II |
| QIVKKLREQFGNNK     | HIV | gp160 | II |
| QNQKEKNEQELLE      | HIV | gp160 | II |
| QHLLQLTVWGIKQL     | HIV | gp160 | II |
| QSSGGDPEIV         | HIV | gp160 | II |
| RDGGTNVTNDTEVFRC   | HIV | gp160 | II |
| RIHIGPGRAFYTTKN    | HIV | gp160 | II |
| RIIGDIRKAHCNISRY   | HIV | gp160 | II |
| RIQRGPGRAFVTIGK    | HIV | gp160 | II |
| RPVVSTQLLNGSLA     | HIV | gp160 | II |
| SANFTDNAKTIIVQL    | HIV | gp160 | II |
| SFEPPIHYCAP        | HIV | gp160 | II |
| SLKPCVKLTPLC       | HIV | gp160 | II |
| SLKPCVKLTPLCVSL    | HIV | gp160 | II |
| SLWDQSLKPCVKLTPL   | HIV | gp160 | II |
| SSGKPEIVTHSFNC     | HIV | gp160 | II |
| SSNITGLLTRDGGTC    | HIV | gp160 | II |
| SSSIITIPCRKQII     | HIV | gp160 | II |
| SVITQACSKVSFE      | HIV | gp160 | II |
| SVVEINCTRPNNNTRKS  | HIV | gp160 | II |
| TEKLWVTYYGVVW      | HIV | gp160 | II |
| TGDHIGDIRQAHCNI    | HIV | gp160 | II |
| THACVPADPNPQEMV    | HIV | gp160 | II |
| TKAKRRRVEREKR      | HIV | gp160 | II |
| TLEQIVKKLREQFGNC   | HIV | gp160 | II |
| TNVSTVQCTHGRPIY    | HIV | gp160 | II |
| TQLFNSTWFNSTWST    | HIV | gp160 | II |
| TTLFCASKAKAYDTE    | HIV | gp160 | II |
| TWFNSTWSTKGSNNT    | HIV | gp160 | II |

|                    |     |           |    |
|--------------------|-----|-----------|----|
| TWSTKGSNNTEGSDT    | HIV | gp160     | II |
| VGLNWWTVYYGVPVWk   | HIV | gp160     | II |
| VGRAMYAPPIKGNIT    | HIV | gp160     | II |
| VITQACPVSFEPIP     | HIV | gp160     | II |
| VVIRSDNFTNNAKTIC   | HIV | gp160     | II |
| VYALFYRLDIVPLTK    | HIV | gp160     | II |
| VYYGVPVWKEA        | HIV | gp160     | II |
| WLNATAIAVTEGTDRC   | HIV | gp160     | II |
| WSNKSLEDIWDNMTWC   | HIV | gp160     | II |
| WVTVYYGVPVWKGAT    | HIV | gp160     | II |
| YFNMWKNNMV         | HIV | gp160     | II |
| YKVVEIKPLGVAPTT    | HIV | gp160     | II |
| YKYKVVKIEPLGVAP    | HIV | gp160     | II |
| YLRDQQLGIWG        | HIV | gp160     | II |
| YVAEGTDRVIEVVQGAC  | HIV | gp160     | II |
| AGERIVDIIATDIQT    | HIV | Integrase | II |
| ELKKIIGQVRDQAEHLK  | HIV | Integrase | II |
| HSNWRAMASDFNLPP    | HIV | Integrase | II |
| KQITKIQNFRVYY      | HIV | Integrase | II |
| KTAVQMAVFIHNFKR    | HIV | Integrase | II |
| KTAVQMAVFIHNFKR    | HIV | Integrase | II |
| LKTAVQMAVFIHNFK    | HIV | Integrase | II |
| LWKGEGAVVIQDNSDIK' | HIV | Integrase | II |
| QKQITKIQNFRVYYR    | HIV | Integrase | II |
| RKGGIGGYSAGERIVDII | HIV | Integrase | II |
| SAGERIVDIIATDIQTK  | HIV | Integrase | II |
| TEKLQKQITKIQNFRVYY | HIV | Integrase | II |
| VIQDNSDIKVPRRKAKI  | HIV | Integrase | II |
| AFHHMARELHPEYYKDC  | HIV | Nef       | II |
| AWLEAQEEEEVGF      | HIV | Nef       | II |
| EEVGFVVRPQ         | HIV | Nef       | II |
| EVGFVIPQVPLRPM     | HIV | Nef       | II |
| FDSRLAFHHVARELHP   | HIV | Nef       | II |
| FHHMARELH          | HIV | Nef       | II |
| FKGAFDLSFFLKEKGG   | HIV | Nef       | II |
| KFDSRLAFHHMARELH   | HIV | Nef       | II |
| LAFHHVARELHPEYF    | HIV | Nef       | II |
| LEKHGAISSNTAAT     | HIV | Nef       | II |
| LWVYHTGGYFPDWQN    | HIV | Nef       | II |
| LWVYHTQGYFPDWQNY   | HIV | Nef       | II |
| NSLLHPMSLHGMDDEK   | HIV | Nef       | II |
| PAVRERMRAEPAADGV   | HIV | Nef       | II |
| PEKEVLVWKFDSRLAFH  | HIV | Nef       | II |
| QKRQDILDWVYHTQGY   | HIV | Nef       | II |
| QVPLRPMTYKAAVDLSH  | HIV | Nef       | II |
| RRAEPAADGVGAVSRDL  | HIV | Nef       | II |
| RSVVGWPAVRERMRA    | HIV | Nef       | II |
| SAIRERMRR          | HIV | Nef       | II |
| SSNTAATNAACAWLE    | HIV | Nef       | II |
| YKAAVDLSHFLKEKGG   | HIV | Nef       | II |
| AAADTGHSSQVSQNY    | HIV | p17       | II |
| ASILRGGKLDKW       | HIV | p17       | II |
| ASRELERFALNPGLL    | HIV | p17       | II |
| ASRELERFAVNPGLL    | HIV | p17       | II |
| EELRSLYNTVATLYC    | HIV | p17       | II |
| EGCRQILGQLQPSLQTGS | HIV | p17       | II |
| EIKDTKEALDKIEEE    | HIV | p17       | II |
| EKIRLRPGGKKKYKL    | HIV | p17       | II |
| EKIRLRPGGKKKYKLHK  | HIV | p17       | II |
| EKIRLRPGGKKKYKLKH  | HIV | p17       | II |
| ERFALNPGLLETSEGGK  | HIV | p17       | II |
| ERFALNPGLLETAEG    | HIV | p17       | II |
| ERFAVNPGLL         | HIV | p17       | II |
| ERFAVNPGLLETSEGCR  | HIV | p17       | II |
| GGKLDaweKIRLRPG    | HIV | p17       | II |
| GKKHYMLKHLVWASREI  | HIV | p17       | II |
| GKKKYKLKHIVWASREL  | HIV | p17       | II |
| GLLETSEGCRQLGQL    | HIV | p17       | II |
| HIVWASRELERFAVN    | HIV | p17       | II |
| HYMLKHLVWAS        | HIV | p17       | II |
| KHIVWASRELERFAV    | HIV | p17       | II |
| LERFAVNPGLL        | HIV | p17       | II |
| LERFAVNPGLLETSE    | HIV | p17       | II |

|                     |     |         |    |
|---------------------|-----|---------|----|
| LKSLFNTVATLYCVH     | HIV | p17     | II |
| LRPGGKKKYKLVHIV     | HIV | p17     | II |
| MGARASVLSGGELDRW    | HIV | p17     | II |
| PGLLETSEGCK         | HIV | p17     | II |
| RELERFAVN           | HIV | p17     | II |
| RLRPGGKKHYM         | HIV | p17     | II |
| SGGELDRWEKIRLRPGG   | HIV | p17     | II |
| SLYNTVATLYCVHQR     | HIV | p17     | II |
| SLYNTVATLYCVHQRIEV  | HIV | p17     | II |
| SRELERFALNPSLLEE    | HIV | p17     | II |
| TGSEELRSLYNTVATLY   | HIV | p17     | II |
| TSEELKSLFVTVATL     | HIV | p17     | II |
| VATLYCVHAGI         | HIV | p17     | II |
| YKLVKLVHIVWASRELER  | HIV | p17     | II |
| SQVSQNYPIVQNLQGGM   | HIV | p17-p24 | II |
| AAEWDRLHPVHAGPIA    | HIV | p24     | II |
| AFSPEVIPMFSALSEC    | HIV | p24     | II |
| AFSPEVIPMFSALSEGA   | HIV | p24     | II |
| AFSPEVIPMFSALSEGAT  | HIV | p24     | II |
| AFSPEVIPMFT         | HIV | p24     | II |
| AFSPEVIPMFTALSEGA   | HIV | p24     | II |
| AMQMKLETINEEAAE     | HIV | p24     | II |
| AMQMLKETINEEAAE     | HIV | p24     | II |
| AWVKVIEKAFSPEV      | HIV | p24     | II |
| DLNTMLNTYGGHQAAC    | HIV | p24     | II |
| DRFFKTLRAEQAT       | HIV | p24     | II |
| DRFFKTLRAEQATQE     | HIV | p24     | II |
| DVKNWMTDTLLQNA      | HIV | p24     | II |
| DYVDRFYKTLRAE       | HIV | p24     | II |
| DYVDRFYKTLRAEQA     | HIV | p24     | II |
| EAAEWDVHP           | HIV | p24     | II |
| EAAEWDVHPVHAGP      | HIV | p24     | II |
| EKAFSPEV            | HIV | p24     | II |
| EKAFSPEVIP          | HIV | p24     | II |
| EYKRWILG            | HIV | p24     | II |
| EYRWILG             | HIV | p24     | II |
| EPRGSDIAGT          | HIV | p24     | II |
| EQIAWMTSNPPVPG      | HIV | p24     | II |
| ETINEEAAEWDVHPC     | HIV | p24     | II |
| ETINEEAAEWDVHPVH    | HIV | p24     | II |
| EVIPMFSALS          | HIV | p24     | II |
| EWDRVHPVHA          | HIV | p24     | II |
| FFKTLRAEQATQE       | HIV | p24     | II |
| FRDYVDRFFKT         | HIV | p24     | II |
| FRDYVDRFYKTLRAE     | HIV | p24     | II |
| FYKTLRAEQASQ        | HIV | p24     | II |
| FYKTLRAEQASQE       | HIV | p24     | II |
| GEYKRWILGLNKI       | HIV | p24     | II |
| GEYRWILGLNKI        | HIV | p24     | II |
| GGHQAAMQMLKDTINEI   | HIV | p24     | II |
| GLNKIVRMYSPSIL      | HIV | p24     | II |
| GPKEPFRDYVDRFYK     | HIV | p24     | II |
| GPKEPFRDYVDRFYKTL   | HIV | p24     | II |
| GQMPREPRGSDI        | HIV | p24     | II |
| GSDIAGTTSTLQEQI     | HIV | p24     | II |
| GSDIAGTTSTLQEQIC    | HIV | p24     | II |
| GTTSTLQEQIA         | HIV | p24     | II |
| IAPGQMPREPRGSDIA    | HIV | p24     | II |
| ILGLNKIVRMY         | HIV | p24     | II |
| ILKALGPAATLEEMM     | HIV | p24     | II |
| INEEAAEWDRL         | HIV | p24     | II |
| IRQGPKEPFRDYVDR     | HIV | p24     | II |
| IVRMYSPSILDIRQC     | HIV | p24     | II |
| IVRMYSPSILDIRQPK    | HIV | p24     | II |
| IYKRWILGLNKIVR      | HIV | p24     | II |
| KIVRMYSPS           | HIV | p24     | II |
| KIVRMYSPS           | HIV | p24     | II |
| KRWILGLNKIVRMY      | HIV | p24     | II |
| KVVEEKAFSPEVIPM     | HIV | p24     | II |
| LDIRQGPKEPFRDYVC    | HIV | p24     | II |
| LGPAATLEEMMTACQ     | HIV | p24     | II |
| LHPVHAGPIAPGQMPREPI | HIV | p24     | II |
| LLVQANPDCCKTILR     | HIV | p24     | II |

|                     |     |              |    |
|---------------------|-----|--------------|----|
| LNKIVRMYSVPSILD     | HIV | p24          | II |
| LRAEQASQEVKNWMT     | HIV | p24          | II |
| MREPRGSKIAGTTST     | HIV | p24          | II |
| MTDTLLQANANPDCKTIL  | HIV | p24          | II |
| MTETLLVQANANPDCKTII | HIV | p24          | II |
| NANPDCKTILKALGPAA   | HIV | p24          | II |
| NAWVKVVEEKAFSPE     | HIV | p24          | II |
| NPPIPVGEIYKRWIIC    | HIV | p24          | II |
| NTMLNTVGGHQAAM      | HIV | p24          | II |
| PEVIPMFSALSEGATP    | HIV | p24          | II |
| PGQMREPRGSDIAGT     | HIV | p24          | II |
| PIVQNIQGG           | HIV | p24          | II |
| PIVQNIQGGMVHQAI     | HIV | p24          | II |
| PIVQNLQGMV          | HIV | p24          | II |
| PKEPFRDYV           | HIV | p24          | II |
| PMFTALSEGAT         | HIV | p24          | II |
| PQDLNMMLNIVGGHQA    | HIV | p24          | II |
| PQDLNTMLNTVGGHQ     | HIV | p24          | II |
| PRTLNAWVKVVEEKAF    | HIV | p24          | II |
| PVGDYIKRWIILGLNKIV  | HIV | p24          | II |
| PVGEIYKRWIILGLN     | HIV | p24          | II |
| PVGEIYKRWIILGLNKIV  | HIV | p24          | II |
| PVHGPIAPGQMREP      | HIV | p24          | II |
| QGMVHQAI            | HIV | p24          | II |
| QMVHQAI             | HIV | p24          | II |
| RAEQASQEVKNWMT      | HIV | p24          | II |
| REPRGSDIAGTTSTL     | HIV | p24          | II |
| RFYKTLRAEQAS        | HIV | p24          | II |
| RLHPVHAGPIA         | HIV | p24          | II |
| SALSEGATPQDLNTMC    | HIV | p24          | II |
| SILDIRQGPKEPFRDYV   | HIV | p24          | II |
| SPTSILDIRQGPKEP     | HIV | p24          | II |
| STLQEQIGWMTNPP      | HIV | p24          | II |
| STLQEQIGWMTNPPPIV   | HIV | p24          | II |
| TNNPIPBGGEIYKRW     | HIV | p24          | II |
| TPQDLNTMLNTVGGH     | HIV | p24          | II |
| VDRFYKTLRAEQASQ     | HIV | p24          | II |
| VHAGPIAPG           | HIV | p24          | II |
| VHQAI               | HIV | p24          | II |
| VKNWMTETLLVQANANC   | HIV | p24          | II |
| WIILGLNKIVRM        | HIV | p24          | II |
| WIILGLNKIVRMYS      | HIV | p24          | II |
| WIILGLNKIVRMYSPTS   | HIV | p24          | II |
| WILLGLNKIVRMYSPTS   | HIV | p24          | II |
| WKVVEEKAFSPEVIPMF   | HIV | p24          | II |
| WMTSNPPVPG          | HIV | p24          | II |
| WVKVVEEKAFSPEVPM    | HIV | p24          | II |
| YKTLRAEQA           | HIV | p24          | II |
| YKTLRAEQASQEVKN     | HIV | p24          | II |
| YVDRFFKTLRAEQATQD   | HIV | p24          | II |
| YVDRFYKTLRAEQASQE   | HIV | p24          | II |
| ACQGVGGPGHKARVLA    | HIV | p24-p2p7p1p6 | II |
| GHKARVLAEAMSQVTNS   | HIV | p24-p2p7p1p6 | II |
| DCTERQANFLG         | HIV | p2p7p1p6     | II |
| EAMSQVTNSATIMMQR    | HIV | p2p7p1p6     | II |
| EPIDKELYPLASLRS     | HIV | p2p7p1p6     | II |
| ESFRSGVETTPPQK      | HIV | p2p7p1p6     | II |
| FEETTPAPPKQ         | HIV | p2p7p1p6     | II |
| FLQSRPEPTAPPEESFRF  | HIV | p2p7p1p6     | II |
| FNCGKEGHTARNCRA     | HIV | p2p7p1p6     | II |
| GEETTPSQKQEPIDKEL   | HIV | p2p7p1p6     | II |
| GKIWPSHKGRPGNLFQSI  | HIV | p2p7p1p6     | II |
| GRPGNLFQSRPEPTA     | HIV | p2p7p1p6     | II |
| HIAKNCRAPRKKGCWK    | HIV | p2p7p1p6     | II |
| KDREPLTSLKS         | HIV | p2p7p1p6     | II |
| KEGHQMKDCTERQAN     | HIV | p2p7p1p6     | II |
| MKDCTERQANFLGKI     | HIV | p2p7p1p6     | II |
| QKQEPIDKELYPLASLR   | HIV | p2p7p1p6     | II |
| QRGNFRNQRKTVKCF     | HIV | p2p7p1p6     | II |
| RAPRKKGCWKCGKEGH    | HIV | p2p7p1p6     | II |
| RNQRKTVKCFNCGKEGH   | HIV | p2p7p1p6     | II |
| RQANFLGKIWPSHKGR    | HIV | p2p7p1p6     | II |
| TNSATIMMQRGNFRNQR   | HIV | p2p7p1p6     | II |

|                    |     |              |    |
|--------------------|-----|--------------|----|
| VKCFNCGKGEH        | HIV | p2p7p1p6     | II |
| FIKVRQYDQIPIEICGKK | HIV | Protease     | II |
| DEELIRTVRLIKLLY    | HIV | Rev          | II |
| GTRQARRNRRRRWRER   | HIV | Rev          | II |
| KTVRLIKFLYQSNPPPS  | HIV | Rev          | II |
| RRRRWRERQRQIHSIS   | HIV | Rev          | II |
| SNPPNPEGTRQARR     | HIV | Rev          | II |
| EICTEMEKEGKISKIGP  | HIV | RT           | II |
| EKVYLAWVPAHKGIG    | HIV | RT           | II |
| FRKYTAFTIPSINNE    | HIV | RT           | II |
| GKTPKFKLPIQKETW    | HIV | RT           | II |
| GTKALTEVIPLTEEA    | HIV | RT           | II |
| IGQHRKIEELRQHL     | HIV | RT           | II |
| KDSSTVNDIQKLVGK    | HIV | RT           | II |
| KDSWTVNDIQKLVGK    | HIV | RT           | II |
| KDSWTWNDIQKLVGK    | HIV | RT           | II |
| KVYLAWVPAHKGIGG    | HIV | RT           | II |
| LAENREILKEPVHGV    | HIV | RT           | II |
| LEKEPIVGAETFYVD    | HIV | RT           | II |
| MTKILEPFRKQNPDIIVY | HIV | RT           | II |
| PLTEEALELAENRE     | HIV | RT           | II |
| QKLWGLNWSAQIYP     | HIV | RT           | II |
| SPAIFQCSSMTKILEP   | HIV | RT           | II |
| SPAIFQSSMTKILEP    | HIV | RT           | II |
| SSTVNDIQKLV        | HIV | RT           | II |
| TEMEKEGKISKIGPE    | HIV | RT           | II |
| TYQIQEPFKNLKTG     | HIV | RT           | II |
| WEFVNTPLVLKLYQ     | HIV | RT           | II |
| WRQLCKLLRGTKALT    | HIV | RT           | II |
| SAGIRKVLFLD        | HIV | RT-Integrase | II |
| HCQVCFITKALGISYG   | HIV | Tat          | II |
| HCQVCFMTKGLGISYG   | HIV | Tat          | II |
| HQASLSKQPTSQPRGD   | HIV | Tat          | II |
| KALGISYGRKRRQR     | HIV | Tat          | II |
| QPKTACTNCYCKKCCF   | HIV | Tat          | II |
| QPKTACTNCYCKRCCF   | HIV | Tat          | II |
| LGQGVSIEWRKQRYST   | HIV | Vif          | II |
| VITTYWGLHTGE       | HIV | Vif          | II |
| DTWAGVEAIRILQQ     | HIV | Vpr          | II |
| ETYGDTWAGVEAIR     | HIV | Vpr          | II |
| IHFRIICRHSRIGVT    | HIV | Vpr          | II |
| LQQLFIHFRIICRHS    | HIV | Vpr          | II |
| PRIWLHGLGQHIYET    | HIV | Vpr          | II |
| QLLFIHFRIICRHSR    | HIV | Vpr          | II |
| RHFPRWLHGLGQHI     | HIV | Vpr          | II |
| SRIGLRQRARRNGASRS  | HIV | Vpr          | II |
| AIVVWSIVLIEYRKIL   | HIV | Vpu          | II |
