# Supplementary material for: Equivalent T Cell Epitope Promiscuity in Ecologically Diverse Human Pathogens
Source: PubMed Central journal article supplement (PMC3739752; doi:10.1371/journal.pone.0073124), 2013-08-09
Supplement: pone.0073124.s005.pdf [file pone.0073124.s005.pdf]

**HLA-DR**

DRB1\_1381  
DRB1\_1389  
DRB5\_0205  
DRB1\_1388  
DRB1\_0106  
DRB1\_0110  
DRB1\_0123  
DRB1\_0840  
DRB1\_0120  
DRB1\_0102  
DRB1\_13101  
DRB1\_1465  
DRB1\_1390  
DRB1\_1421  
DRB1\_1358  
DRB1\_0822  
DRB1\_1394  
DRB1\_0806  
DRB5\_0204  
DRB5\_0202  
DRB1\_0810  
DRB1\_0812  
DRB1\_0121  
DRB1\_1375  
DRB5\_0106  
DRB1\_0467  
DRB1\_0104  
DRB1\_0126  
DRB1\_1303  
DRB1\_1395  
DRB1\_1310  
DRB1\_1142  
DRB1\_1212  
DRB1\_1366  
DRB1\_1157  
DRB1\_0818  
DRB1\_1452  
DRB1\_0908  
DRB1\_1192  
DRB1\_0109  
DRB1\_1413

**HLA-A**

HLA-A01:01  
HLA-A01:02  
HLA-A01:03  
HLA-A01:06  
HLA-A01:07  
HLA-A01:08  
HLA-A01:09  
HLA-A01:10  
HLA-A01:12  
HLA-A01:13  
HLA-A01:14  
HLA-A01:17  
HLA-A01:19  
HLA-A01:20  
HLA-A01:21  
HLA-A01:23  
HLA-A01:24  
HLA-A01:25  
HLA-A01:26  
HLA-A01:28  
HLA-A01:29  
HLA-A01:30  
HLA-A01:32  
HLA-A01:33  
HLA-A01:35  
HLA-A01:36  
HLA-A01:37  
HLA-A01:38  
HLA-A01:39  
HLA-A01:40  
HLA-A01:41  
HLA-A01:42  
HLA-A01:43  
HLA-A01:44  
HLA-A01:45  
HLA-A01:46  
HLA-A01:47  
HLA-A01:48  
HLA-A01:49  
HLA-A01:50  
HLA-A01:51

**HLA-B**

HLA-B07:02  
HLA-B07:03  
HLA-B07:04  
HLA-B07:05  
HLA-B07:06  
HLA-B07:07  
HLA-B07:08  
HLA-B07:09  
HLA-B07:10  
HLA-B07:100  
HLA-B07:101  
HLA-B07:102  
HLA-B07:103  
HLA-B07:104  
HLA-B07:105  
HLA-B07:106  
HLA-B07:107  
HLA-B07:108  
HLA-B07:109  
HLA-B07:11  
HLA-B07:110  
HLA-B07:112  
HLA-B07:113  
HLA-B07:114  
HLA-B07:115  
HLA-B07:12  
HLA-B07:13  
HLA-B07:14  
HLA-B07:15  
HLA-B07:16  
HLA-B07:17  
HLA-B07:18  
HLA-B07:19  
HLA-B07:20  
HLA-B07:21  
HLA-B07:22  
HLA-B07:23  
HLA-B07:24  
HLA-B07:25  
HLA-B07:26  
HLA-B07:27

|           |             |            |
|-----------|-------------|------------|
| DRB1_1480 | HLA-A01:54  | HLA-B07:28 |
| DRB1_0831 | HLA-A01:55  | HLA-B07:29 |
| DRB1_0805 | HLA-A01:58  | HLA-B07:30 |
| DRB1_0101 | HLA-A01:59  | HLA-B07:31 |
| DRB1_0105 | HLA-A01:60  | HLA-B07:32 |
| DRB1_0107 | HLA-A01:61  | HLA-B07:33 |
| DRB1_0108 | HLA-A01:62  | HLA-B07:34 |
| DRB1_0112 | HLA-A01:63  | HLA-B07:35 |
| DRB1_0119 | HLA-A01:64  | HLA-B07:36 |
| DRB1_0122 | HLA-A01:65  | HLA-B07:37 |
| DRB1_0125 | HLA-A01:66  | HLA-B07:38 |
| DRB1_0127 | HLA-A02:01  | HLA-B07:39 |
| DRB1_0128 | HLA-A02:02  | HLA-B07:40 |
| DRB1_0130 | HLA-A02:03  | HLA-B07:41 |
| DRB1_0131 | HLA-A02:04  | HLA-B07:42 |
| DRB1_0132 | HLA-A02:05  | HLA-B07:43 |
| DRB1_1002 | HLA-A02:06  | HLA-B07:44 |
| DRB1_1134 | HLA-A02:07  | HLA-B07:45 |
| DRB1_1344 | HLA-A02:08  | HLA-B07:46 |
| DRB1_1417 | HLA-A02:09  | HLA-B07:47 |
| DRB1_0906 | HLA-A02:10  | HLA-B07:48 |
| DRB1_1332 | HLA-A02:101 | HLA-B07:50 |
| DRB1_1348 | HLA-A02:102 | HLA-B07:51 |
| DRB1_1478 | HLA-A02:103 | HLA-B07:52 |
| DRB1_1204 | HLA-A02:104 | HLA-B07:53 |
| DRB1_1209 | HLA-A02:105 | HLA-B07:54 |
| DRB1_1406 | HLA-A02:106 | HLA-B07:55 |
| DRB1_1420 | HLA-A02:107 | HLA-B07:56 |
| DRB1_1483 | HLA-A02:108 | HLA-B07:57 |
| DRB1_0118 | HLA-A02:109 | HLA-B07:58 |
| DRB1_1211 | HLA-A02:11  | HLA-B07:59 |
| DRB1_0129 | HLA-A02:110 | HLA-B07:60 |
| DRB1_1429 | HLA-A02:111 | HLA-B07:61 |
| DRB1_1113 | HLA-A02:112 | HLA-B07:62 |
| DRB1_0706 | HLA-A02:114 | HLA-B07:63 |
| DRB1_1321 | HLA-A02:115 | HLA-B07:64 |
| DRB1_1304 | HLA-A02:116 | HLA-B07:65 |
| DRB1_1393 | HLA-A02:117 | HLA-B07:66 |
| DRB1_1221 | HLA-A02:118 | HLA-B07:68 |
| DRB1_1481 | HLA-A02:119 | HLA-B07:69 |
| DRB1_0413 | HLA-A02:12  | HLA-B07:70 |
| DRB1_1474 | HLA-A02:120 | HLA-B07:71 |

|           |             |            |
|-----------|-------------|------------|
| DRB1_0113 | HLA-A02:121 | HLA-B07:72 |
| DRB1_1431 | HLA-A02:122 | HLA-B07:73 |
| DRB1_1141 | HLA-A02:123 | HLA-B07:74 |
| DRB1_1512 | HLA-A02:124 | HLA-B07:75 |
| DRB1_0409 | HLA-A02:126 | HLA-B07:76 |
| DRB1_1104 | HLA-A02:127 | HLA-B07:77 |
| DRB1_1135 | HLA-A02:128 | HLA-B07:78 |
| DRB1_1138 | HLA-A02:129 | HLA-B07:79 |
| DRB1_1143 | HLA-A02:13  | HLA-B07:80 |
| DRB1_1144 | HLA-A02:130 | HLA-B07:81 |
| DRB1_1146 | HLA-A02:131 | HLA-B07:82 |
| DRB1_1158 | HLA-A02:132 | HLA-B07:83 |
| DRB1_1160 | HLA-A02:133 | HLA-B07:84 |
| DRB1_1177 | HLA-A02:134 | HLA-B07:85 |
| DRB1_1178 | HLA-A02:135 | HLA-B07:86 |
| DRB1_1202 | HLA-A02:136 | HLA-B07:87 |
| DRB1_1213 | HLA-A02:137 | HLA-B07:88 |
| DRB1_1215 | HLA-A02:138 | HLA-B07:89 |
| DRB1_1218 | HLA-A02:139 | HLA-B07:90 |
| DRB1_1223 | HLA-A02:14  | HLA-B07:91 |
| DRB1_1311 | HLA-A02:140 | HLA-B07:92 |
| DRB1_1342 | HLA-A02:141 | HLA-B07:93 |
| DRB1_1349 | HLA-A02:142 | HLA-B07:94 |
| DRB1_1136 | HLA-A02:143 | HLA-B07:95 |
| DRB1_1208 | HLA-A02:144 | HLA-B07:96 |
| DRB1_1320 | HLA-A02:145 | HLA-B07:97 |
| DRB1_1201 | HLA-A02:146 | HLA-B07:98 |
| DRB1_1203 | HLA-A02:147 | HLA-B07:99 |
| DRB1_1205 | HLA-A02:148 | HLA-B08:01 |
| DRB1_1206 | HLA-A02:149 | HLA-B08:02 |
| DRB1_1207 | HLA-A02:150 | HLA-B08:03 |
| DRB1_1210 | HLA-A02:151 | HLA-B08:04 |
| DRB1_1214 | HLA-A02:152 | HLA-B08:05 |
| DRB1_1217 | HLA-A02:153 | HLA-B08:07 |
| DRB1_1219 | HLA-A02:154 | HLA-B08:09 |
| DRB1_1333 | HLA-A02:155 | HLA-B08:10 |
| DRB1_1103 | HLA-A02:156 | HLA-B08:11 |
| DRB1_1163 | HLA-A02:157 | HLA-B08:12 |
| DRB1_1176 | HLA-A02:158 | HLA-B08:13 |
| DRB1_1185 | HLA-A02:159 | HLA-B08:14 |
| DRB1_1324 | HLA-A02:16  | HLA-B08:15 |
| DRB1_1106 | HLA-A02:160 | HLA-B08:16 |

|           |             |            |
|-----------|-------------|------------|
| DRB1_1147 | HLA-A02:161 | HLA-B08:17 |
| DRB1_0410 | HLA-A02:162 | HLA-B08:18 |
| DRB1_1150 | HLA-A02:163 | HLA-B08:20 |
| DRB1_1156 | HLA-A02:164 | HLA-B08:21 |
| DRB1_1188 | HLA-A02:165 | HLA-B08:22 |
| DRB5_0103 | HLA-A02:166 | HLA-B08:23 |
| DRB1_1312 | HLA-A02:167 | HLA-B08:24 |
| DRB1_1419 | HLA-A02:168 | HLA-B08:25 |
| DRB1_1330 | HLA-A02:169 | HLA-B08:26 |
| DRB1_1179 | HLA-A02:17  | HLA-B08:27 |
| DRB1_0115 | HLA-A02:170 | HLA-B08:28 |
| DRB1_1484 | HLA-A02:171 | HLA-B08:29 |
| DRB1_1317 | HLA-A02:172 | HLA-B08:31 |
| DRB1_1437 | HLA-A02:173 | HLA-B08:32 |
| DRB1_0804 | HLA-A02:174 | HLA-B08:33 |
| DRB1_0902 | HLA-A02:175 | HLA-B08:34 |
| DRB1_1118 | HLA-A02:176 | HLA-B08:35 |
| DRB1_1306 | HLA-A02:177 | HLA-B08:36 |
| DRB1_1415 | HLA-A02:178 | HLA-B08:37 |
| DRB1_1523 | HLA-A02:179 | HLA-B08:38 |
| DRB1_0828 | HLA-A02:18  | HLA-B08:39 |
| DRB1_0837 | HLA-A02:180 | HLA-B08:40 |
| DRB1_1167 | HLA-A02:181 | HLA-B08:41 |
| DRB1_1183 | HLA-A02:182 | HLA-B08:42 |
| DRB1_0114 | HLA-A02:183 | HLA-B08:43 |
| DRB1_0111 | HLA-A02:184 | HLA-B08:44 |
| DRB1_0124 | HLA-A02:185 | HLA-B08:45 |
| DRB1_1485 | HLA-A02:186 | HLA-B08:46 |
| DRB1_0904 | HLA-A02:187 | HLA-B08:47 |
| DRB1_0903 | HLA-A02:188 | HLA-B08:48 |
| DRB1_0116 | HLA-A02:189 | HLA-B08:49 |
| DRB3_0201 | HLA-A02:19  | HLA-B08:50 |
| DRB3_0224 | HLA-A02:190 | HLA-B08:51 |
| DRB1_0832 | HLA-A02:191 | HLA-B08:52 |
| DRB1_1159 | HLA-A02:192 | HLA-B08:53 |
| DRB1_0434 | HLA-A02:193 | HLA-B08:54 |
| DRB1_1319 | HLA-A02:194 | HLA-B08:55 |
| DRB1_1353 | HLA-A02:195 | HLA-B08:56 |
| DRB1_0117 | HLA-A02:196 | HLA-B08:57 |
| DRB1_1309 | HLA-A02:197 | HLA-B08:58 |
| DRB1_1371 | HLA-A02:198 | HLA-B08:59 |
| DRB1_0464 | HLA-A02:199 | HLA-B08:60 |

|            |             |            |
|------------|-------------|------------|
| DRB1_0803  | HLA-A02:20  | HLA-B08:61 |
| DRB1_0814  | HLA-A02:200 | HLA-B08:62 |
| DRB1_0823  | HLA-A02:201 | HLA-B13:01 |
| DRB1_0827  | HLA-A02:202 | HLA-B13:02 |
| DRB1_0833  | HLA-A02:203 | HLA-B13:03 |
| DRB1_0835  | HLA-A02:204 | HLA-B13:04 |
| DRB1_0836  | HLA-A02:205 | HLA-B13:06 |
| DRB1_0838  | HLA-A02:206 | HLA-B13:09 |
| DRB5_0203  | HLA-A02:207 | HLA-B13:10 |
| DRB1_1505  | HLA-A02:208 | HLA-B13:11 |
| DRB1_1360  | HLA-A02:209 | HLA-B13:12 |
| DRB5_0102  | HLA-A02:21  | HLA-B13:13 |
| DRB5_0108N | HLA-A02:210 | HLA-B13:14 |
| DRB1_1220  | HLA-A02:211 | HLA-B13:15 |
| DRB1_1378  | HLA-A02:212 | HLA-B13:16 |
| DRB1_0466  | HLA-A02:213 | HLA-B13:17 |
| DRB1_1412  | HLA-A02:214 | HLA-B13:18 |
| DRB1_0103  | HLA-A02:215 | HLA-B13:19 |
| DRB1_1108  | HLA-A02:216 | HLA-B13:20 |
| DRB1_1356  | HLA-A02:217 | HLA-B13:21 |
| DRB1_1385  | HLA-A02:218 | HLA-B13:22 |
| DRB1_1148  | HLA-A02:219 | HLA-B13:23 |
| DRB1_1308  | HLA-A02:22  | HLA-B13:25 |
| DRB1_1370  | HLA-A02:220 | HLA-B13:26 |
| DRB1_1372  | HLA-A02:221 | HLA-B13:27 |
| DRB1_1384  | HLA-A02:224 | HLA-B13:28 |
| DRB1_1377  | HLA-A02:228 | HLA-B13:29 |
| DRB1_0801  | HLA-A02:229 | HLA-B13:30 |
| DRB1_0816  | HLA-A02:230 | HLA-B13:31 |
| DRB1_0826  | HLA-A02:231 | HLA-B13:32 |
| DRB1_0839  | HLA-A02:232 | HLA-B13:33 |
| DRB1_1001  | HLA-A02:233 | HLA-B13:34 |
| DRB1_1003  | HLA-A02:234 | HLA-B13:35 |
| DRB1_1337  | HLA-A02:235 | HLA-B13:36 |
| DRB1_1173  | HLA-A02:236 | HLA-B13:37 |
| DRB5_0111  | HLA-A02:237 | HLA-B13:38 |
| DRB1_1193  | HLA-A02:238 | HLA-B13:39 |
| DRB1_1315  | HLA-A02:239 | HLA-B14:01 |
| DRB1_1357  | HLA-A02:24  | HLA-B14:02 |
| DRB1_1432  | HLA-A02:240 | HLA-B14:03 |
| DRB1_1354  | HLA-A02:241 | HLA-B14:04 |
| DRB1_1614  | HLA-A02:242 | HLA-B14:05 |

|           |             |             |
|-----------|-------------|-------------|
| DRB1_0712 | HLA-A02:243 | HLA-B14:06  |
| DRB1_1549 | HLA-A02:244 | HLA-B14:08  |
| DRB1_0701 | HLA-A02:245 | HLA-B14:09  |
| DRB1_0703 | HLA-A02:246 | HLA-B14:10  |
| DRB1_0705 | HLA-A02:247 | HLA-B14:11  |
| DRB1_0707 | HLA-A02:248 | HLA-B14:12  |
| DRB1_0708 | HLA-A02:249 | HLA-B14:13  |
| DRB1_0713 | HLA-A02:25  | HLA-B14:14  |
| DRB1_0714 | HLA-A02:251 | HLA-B14:15  |
| DRB1_0715 | HLA-A02:252 | HLA-B14:16  |
| DRB1_0716 | HLA-A02:253 | HLA-B14:17  |
| DRB1_0717 | HLA-A02:254 | HLA-B14:18  |
| DRB1_0719 | HLA-A02:255 | HLA-B15:01  |
| DRB1_1476 | HLA-A02:256 | HLA-B15:02  |
| DRB1_0315 | HLA-A02:257 | HLA-B15:03  |
| DRB1_1121 | HLA-A02:258 | HLA-B15:04  |
| DRB3_0301 | HLA-A02:259 | HLA-B15:05  |
| DRB1_1102 | HLA-A02:26  | HLA-B15:06  |
| DRB1_1116 | HLA-A02:260 | HLA-B15:07  |
| DRB1_1165 | HLA-A02:261 | HLA-B15:08  |
| DRB1_1301 | HLA-A02:262 | HLA-B15:09  |
| DRB1_1322 | HLA-A02:263 | HLA-B15:10  |
| DRB1_1335 | HLA-A02:264 | HLA-B15:101 |
| DRB1_1351 | HLA-A02:265 | HLA-B15:102 |
| DRB1_1352 | HLA-A02:266 | HLA-B15:103 |
| DRB1_1359 | HLA-A02:27  | HLA-B15:104 |
| DRB1_1364 | HLA-A02:28  | HLA-B15:105 |
| DRB1_1368 | HLA-A02:29  | HLA-B15:106 |
| DRB1_1369 | HLA-A02:30  | HLA-B15:107 |
| DRB1_1380 | HLA-A02:31  | HLA-B15:108 |
| DRB1_1383 | HLA-A02:33  | HLA-B15:109 |
| DRB1_1387 | HLA-A02:34  | HLA-B15:11  |
| DRB1_1391 | HLA-A02:35  | HLA-B15:110 |
| DRB1_1392 | HLA-A02:36  | HLA-B15:112 |
| DRB1_1434 | HLA-A02:37  | HLA-B15:113 |
| DRB1_1611 | HLA-A02:38  | HLA-B15:114 |
| DRB1_0901 | HLA-A02:39  | HLA-B15:115 |
| DRB1_0909 | HLA-A02:40  | HLA-B15:116 |
| DRB1_0487 | HLA-A02:41  | HLA-B15:117 |
| DRB1_1411 | HLA-A02:42  | HLA-B15:118 |
| DRB5_0101 | HLA-A02:44  | HLA-B15:119 |
| DRB5_0105 | HLA-A02:45  | HLA-B15:12  |

|           |            |             |
|-----------|------------|-------------|
| DRB5_0113 | HLA-A02:46 | HLA-B15:120 |
| DRB5_0114 | HLA-A02:47 | HLA-B15:121 |
| DRB1_0829 | HLA-A02:48 | HLA-B15:122 |
| DRB1_1338 | HLA-A02:49 | HLA-B15:123 |
| DRB1_1365 | HLA-A02:50 | HLA-B15:124 |
| DRB1_0324 | HLA-A02:51 | HLA-B15:125 |
| DRB1_0479 | HLA-A02:52 | HLA-B15:126 |
| DRB1_0405 | HLA-A02:54 | HLA-B15:127 |
| DRB1_0429 | HLA-A02:55 | HLA-B15:128 |
| DRB1_0430 | HLA-A02:56 | HLA-B15:129 |
| DRB1_0445 | HLA-A02:57 | HLA-B15:13  |
| DRB1_0448 | HLA-A02:58 | HLA-B15:131 |
| DRB1_0477 | HLA-A02:59 | HLA-B15:132 |
| DRB1_0483 | HLA-A02:60 | HLA-B15:133 |
| DRB1_0484 | HLA-A02:61 | HLA-B15:134 |
| DRB1_0489 | HLA-A02:62 | HLA-B15:135 |
| DRB1_1343 | HLA-A02:63 | HLA-B15:136 |
| DRB1_1172 | HLA-A02:64 | HLA-B15:137 |
| DRB1_1313 | HLA-A02:65 | HLA-B15:138 |
| DRB3_0214 | HLA-A02:66 | HLA-B15:139 |
| DRB1_0401 | HLA-A02:67 | HLA-B15:14  |
| DRB1_0416 | HLA-A02:68 | HLA-B15:140 |
| DRB1_0426 | HLA-A02:69 | HLA-B15:141 |
| DRB1_0433 | HLA-A02:70 | HLA-B15:142 |
| DRB1_0463 | HLA-A02:71 | HLA-B15:143 |
| DRB1_0476 | HLA-A02:72 | HLA-B15:144 |
| DRB1_1430 | HLA-A02:73 | HLA-B15:145 |
| DRB1_0709 | HLA-A02:74 | HLA-B15:146 |
| DRB3_0215 | HLA-A02:75 | HLA-B15:147 |
| DRB1_0820 | HLA-A02:76 | HLA-B15:148 |
| DRB1_1612 | HLA-A02:77 | HLA-B15:15  |
| DRB1_0311 | HLA-A02:78 | HLA-B15:150 |
| DRB1_0428 | HLA-A02:79 | HLA-B15:151 |
| DRB1_0435 | HLA-A02:80 | HLA-B15:152 |
| DRB1_1398 | HLA-A02:81 | HLA-B15:153 |
| DRB1_1433 | HLA-A02:84 | HLA-B15:154 |
| DRB1_1503 | HLA-A02:85 | HLA-B15:155 |
| DRB1_1615 | HLA-A02:86 | HLA-B15:156 |
| DRB3_0204 | HLA-A02:87 | HLA-B15:157 |
| DRB1_0412 | HLA-A02:89 | HLA-B15:158 |
| DRB1_1602 | HLA-A02:90 | HLA-B15:159 |
| DRB1_1610 | HLA-A02:91 | HLA-B15:16  |

|           |            |             |
|-----------|------------|-------------|
| DRB1_1616 | HLA-A02:92 | HLA-B15:160 |
| DRB1_0404 | HLA-A02:93 | HLA-B15:161 |
| DRB1_0423 | HLA-A02:95 | HLA-B15:162 |
| DRB1_0440 | HLA-A02:96 | HLA-B15:163 |
| DRB1_0468 | HLA-A02:97 | HLA-B15:164 |
| DRB1_0470 | HLA-A02:99 | HLA-B15:165 |
| DRB1_1184 | HLA-A03:01 | HLA-B15:166 |
| DRB1_1327 | HLA-A03:02 | HLA-B15:167 |
| DRB1_1170 | HLA-A03:04 | HLA-B15:168 |
| DRB1_1379 | HLA-A03:05 | HLA-B15:169 |
| DRB1_1536 | HLA-A03:06 | HLA-B15:17  |
| DRB1_1409 | HLA-A03:07 | HLA-B15:170 |
| DRB1_1518 | HLA-A03:08 | HLA-B15:171 |
| DRB1_1125 | HLA-A03:09 | HLA-B15:172 |
| DRB1_1318 | HLA-A03:10 | HLA-B15:173 |
| DRB1_1386 | HLA-A03:12 | HLA-B15:174 |
| DRB1_1463 | HLA-A03:13 | HLA-B15:175 |
| DRB1_1535 | HLA-A03:14 | HLA-B15:176 |
| DRB1_0411 | HLA-A03:15 | HLA-B15:177 |
| DRB1_0424 | HLA-A03:16 | HLA-B15:178 |
| DRB1_0442 | HLA-A03:17 | HLA-B15:179 |
| DRB1_0491 | HLA-A03:18 | HLA-B15:18  |
| DRB1_1186 | HLA-A03:19 | HLA-B15:180 |
| DRB1_1316 | HLA-A03:20 | HLA-B15:183 |
| DRB1_1469 | HLA-A03:22 | HLA-B15:184 |
| DRB1_1528 | HLA-A03:23 | HLA-B15:185 |
| DRB1_1501 | HLA-A03:24 | HLA-B15:186 |
| DRB1_1506 | HLA-A03:25 | HLA-B15:187 |
| DRB1_1509 | HLA-A03:26 | HLA-B15:188 |
| DRB1_1513 | HLA-A03:27 | HLA-B15:189 |
| DRB1_1516 | HLA-A03:28 | HLA-B15:19  |
| DRB1_1520 | HLA-A03:29 | HLA-B15:191 |
| DRB1_1522 | HLA-A03:30 | HLA-B15:192 |
| DRB1_1524 | HLA-A03:31 | HLA-B15:193 |
| DRB1_1532 | HLA-A03:32 | HLA-B15:194 |
| DRB1_1533 | HLA-A03:33 | HLA-B15:195 |
| DRB1_1540 | HLA-A03:34 | HLA-B15:196 |
| DRB1_1541 | HLA-A03:35 | HLA-B15:197 |
| DRB1_1542 | HLA-A03:37 | HLA-B15:198 |
| DRB1_1543 | HLA-A03:38 | HLA-B15:199 |
| DRB1_1545 | HLA-A03:39 | HLA-B15:20  |
| DRB1_1546 | HLA-A03:40 | HLA-B15:200 |

|           |            |             |
|-----------|------------|-------------|
| DRB1_0307 | HLA-A03:41 | HLA-B15:201 |
| DRB1_0321 | HLA-A03:42 | HLA-B15:202 |
| DRB1_0349 | HLA-A03:43 | HLA-B15:21  |
| DRB1_1107 | HLA-A03:44 | HLA-B15:23  |
| DRB1_1117 | HLA-A03:45 | HLA-B15:24  |
| DRB1_1168 | HLA-A03:46 | HLA-B15:25  |
| DRB1_1329 | HLA-A03:47 | HLA-B15:27  |
| DRB1_1402 | HLA-A03:48 | HLA-B15:28  |
| DRB1_1405 | HLA-A03:49 | HLA-B15:29  |
| DRB1_1423 | HLA-A03:50 | HLA-B15:30  |
| DRB1_1441 | HLA-A03:51 | HLA-B15:31  |
| DRB1_1456 | HLA-A03:52 | HLA-B15:32  |
| DRB1_1459 | HLA-A03:53 | HLA-B15:33  |
| DRB1_1491 | HLA-A03:54 | HLA-B15:34  |
| DRB1_1494 | HLA-A03:55 | HLA-B15:35  |
| DRB1_1496 | HLA-A03:56 | HLA-B15:36  |
| DRB1_0303 | HLA-A03:57 | HLA-B15:37  |
| DRB1_0306 | HLA-A03:58 | HLA-B15:38  |
| DRB1_0326 | HLA-A03:59 | HLA-B15:39  |
| DRB1_0331 | HLA-A03:60 | HLA-B15:40  |
| DRB1_0347 | HLA-A03:61 | HLA-B15:42  |
| DRB1_0415 | HLA-A03:62 | HLA-B15:43  |
| DRB1_0436 | HLA-A03:63 | HLA-B15:44  |
| DRB1_1155 | HLA-A03:64 | HLA-B15:45  |
| DRB1_1105 | HLA-A03:65 | HLA-B15:46  |
| DRB1_0458 | HLA-A03:66 | HLA-B15:47  |
| DRB1_1181 | HLA-A03:67 | HLA-B15:48  |
| DRB1_1355 | HLA-A03:70 | HLA-B15:49  |
| DRB1_1504 | HLA-A03:71 | HLA-B15:50  |
| DRB4_0101 | HLA-A03:72 | HLA-B15:51  |
| DRB4_0103 | HLA-A03:73 | HLA-B15:52  |
| DRB1_1154 | HLA-A03:74 | HLA-B15:53  |
| DRB1_1361 | HLA-A03:75 | HLA-B15:54  |
| DRB1_1418 | HLA-A03:76 | HLA-B15:55  |
| DRB1_1507 | HLA-A03:77 | HLA-B15:56  |
| DRB1_1548 | HLA-A03:78 | HLA-B15:57  |
| DRB1_0457 | HLA-A03:79 | HLA-B15:58  |
| DRB1_0813 | HLA-A03:80 | HLA-B15:60  |
| DRB1_1114 | HLA-A03:81 | HLA-B15:61  |
| DRB1_1120 | HLA-A03:82 | HLA-B15:62  |
| DRB1_1191 | HLA-A11:01 | HLA-B15:63  |
| DRB1_1302 | HLA-A11:02 | HLA-B15:64  |

|           |            |            |
|-----------|------------|------------|
| DRB1_1323 | HLA-A11:03 | HLA-B15:65 |
| DRB1_1334 | HLA-A11:04 | HLA-B15:66 |
| DRB1_1336 | HLA-A11:05 | HLA-B15:67 |
| DRB1_1346 | HLA-A11:06 | HLA-B15:68 |
| DRB1_1373 | HLA-A11:07 | HLA-B15:69 |
| DRB1_1374 | HLA-A11:08 | HLA-B15:70 |
| DRB1_1397 | HLA-A11:09 | HLA-B15:71 |
| DRB1_1399 | HLA-A11:10 | HLA-B15:72 |
| DRB1_1495 | HLA-A11:11 | HLA-B15:73 |
| DRB1_1527 | HLA-A11:12 | HLA-B15:74 |
| DRB1_1101 | HLA-A11:13 | HLA-B15:75 |
| DRB1_1109 | HLA-A11:14 | HLA-B15:76 |
| DRB1_1110 | HLA-A11:15 | HLA-B15:77 |
| DRB1_1111 | HLA-A11:16 | HLA-B15:78 |
| DRB1_1112 | HLA-A11:17 | HLA-B15:80 |
| DRB1_1115 | HLA-A11:18 | HLA-B15:81 |
| DRB1_1119 | HLA-A11:19 | HLA-B15:82 |
| DRB1_1124 | HLA-A11:20 | HLA-B15:83 |
| DRB1_1128 | HLA-A11:22 | HLA-B15:84 |
| DRB1_1129 | HLA-A11:23 | HLA-B15:85 |
| DRB1_1133 | HLA-A11:24 | HLA-B15:86 |
| DRB1_1139 | HLA-A11:25 | HLA-B15:87 |
| DRB1_1149 | HLA-A11:26 | HLA-B15:88 |
| DRB1_1151 | HLA-A11:27 | HLA-B15:89 |
| DRB1_1161 | HLA-A11:29 | HLA-B15:90 |
| DRB1_1162 | HLA-A11:30 | HLA-B15:91 |
| DRB1_1166 | HLA-A11:31 | HLA-B15:92 |
| DRB1_1174 | HLA-A11:32 | HLA-B15:93 |
| DRB1_1175 | HLA-A11:33 | HLA-B15:95 |
| DRB1_1190 | HLA-A11:34 | HLA-B15:96 |
| DRB1_1194 | HLA-A11:35 | HLA-B15:97 |
| DRB1_1195 | HLA-A11:36 | HLA-B15:98 |
| DRB1_1305 | HLA-A11:37 | HLA-B15:99 |
| DRB1_1314 | HLA-A11:38 | HLA-B18:01 |
| DRB1_1350 | HLA-A11:39 | HLA-B18:02 |
| DRB1_1362 | HLA-A11:40 | HLA-B18:03 |
| DRB1_1363 | HLA-A11:41 | HLA-B18:04 |
| DRB1_1382 | HLA-A11:42 | HLA-B18:05 |
| DRB1_1404 | HLA-A11:43 | HLA-B18:06 |
| DRB1_1428 | HLA-A11:44 | HLA-B18:07 |
| DRB1_1461 | HLA-A11:45 | HLA-B18:08 |
| DRB3_0212 | HLA-A11:46 | HLA-B18:09 |

|           |            |            |
|-----------|------------|------------|
| DRB1_0480 | HLA-A11:47 | HLA-B18:10 |
| DRB1_1416 | HLA-A11:48 | HLA-B18:11 |
| DRB1_1448 | HLA-A11:49 | HLA-B18:12 |
| DRB1_1510 | HLA-A11:51 | HLA-B18:13 |
| DRB1_1521 | HLA-A11:53 | HLA-B18:14 |
| DRB1_1534 | HLA-A11:54 | HLA-B18:15 |
| DRB1_0455 | HLA-A11:55 | HLA-B18:18 |
| DRB1_1331 | HLA-A11:56 | HLA-B18:19 |
| DRB3_0213 | HLA-A11:57 | HLA-B18:20 |
| DRB1_0301 | HLA-A11:58 | HLA-B18:21 |
| DRB1_0304 | HLA-A11:59 | HLA-B18:22 |
| DRB1_0308 | HLA-A11:60 | HLA-B18:24 |
| DRB1_0318 | HLA-A11:61 | HLA-B18:25 |
| DRB1_0322 | HLA-A11:62 | HLA-B18:26 |
| DRB1_0323 | HLA-A11:63 | HLA-B18:27 |
| DRB1_0325 | HLA-A11:64 | HLA-B18:28 |
| DRB1_0328 | HLA-A23:01 | HLA-B18:29 |
| DRB1_0330 | HLA-A23:02 | HLA-B18:30 |
| DRB1_0332 | HLA-A23:03 | HLA-B18:31 |
| DRB1_0333 | HLA-A23:04 | HLA-B18:32 |
| DRB1_0334 | HLA-A23:05 | HLA-B18:33 |
| DRB1_0336 | HLA-A23:06 | HLA-B18:34 |
| DRB1_0337 | HLA-A23:09 | HLA-B18:35 |
| DRB1_0339 | HLA-A23:10 | HLA-B18:36 |
| DRB1_0343 | HLA-A23:12 | HLA-B18:37 |
| DRB1_0344 | HLA-A23:13 | HLA-B18:38 |
| DRB1_0345 | HLA-A23:14 | HLA-B18:39 |
| DRB1_0346 | HLA-A23:15 | HLA-B18:40 |
| DRB1_0348 | HLA-A23:16 | HLA-B18:41 |
| DRB1_0350 | HLA-A23:17 | HLA-B18:42 |
| DRB1_0351 | HLA-A23:18 | HLA-B18:43 |
| DRB1_0352 | HLA-A23:20 | HLA-B18:44 |
| DRB1_0354 | HLA-A23:21 | HLA-B18:45 |
| DRB1_0355 | HLA-A23:22 | HLA-B18:46 |
| DRB1_0450 | HLA-A23:23 | HLA-B18:47 |
| DRB1_0711 | HLA-A23:24 | HLA-B18:48 |
| DRB1_1164 | HLA-A23:25 | HLA-B18:49 |
| DRB1_1446 | HLA-A23:26 | HLA-B18:50 |
| DRB1_1531 | HLA-A24:02 | HLA-B27:01 |
| DRB3_0202 | HLA-A24:03 | HLA-B27:02 |
| DRB3_0210 | HLA-A24:04 | HLA-B27:03 |
| DRB3_0218 | HLA-A24:05 | HLA-B27:04 |

|            |             |            |
|------------|-------------|------------|
| DRB3_0220  | HLA-A24:06  | HLA-B27:05 |
| DRB3_0223  | HLA-A24:07  | HLA-B27:06 |
| DRB1_0437  | HLA-A24:08  | HLA-B27:07 |
| DRB1_1216  | HLA-A24:10  | HLA-B27:08 |
| DRB1_1424  | HLA-A24:100 | HLA-B27:09 |
| DRB1_1443  | HLA-A24:101 | HLA-B27:10 |
| DRB1_0320  | HLA-A24:102 | HLA-B27:11 |
| DRB1_0417  | HLA-A24:103 | HLA-B27:12 |
| DRB1_0446  | HLA-A24:104 | HLA-B27:13 |
| DRB1_0472  | HLA-A24:105 | HLA-B27:14 |
| DRB1_0824  | HLA-A24:106 | HLA-B27:15 |
| DRB1_1130  | HLA-A24:107 | HLA-B27:16 |
| DRB1_1367  | HLA-A24:108 | HLA-B27:17 |
| DRB1_1447  | HLA-A24:109 | HLA-B27:18 |
| DRB1_1449  | HLA-A24:110 | HLA-B27:19 |
| DRB1_1462  | HLA-A24:111 | HLA-B27:20 |
| DRB1_1464  | HLA-A24:112 | HLA-B27:21 |
| DRB1_0317  | HLA-A24:113 | HLA-B27:23 |
| DRB1_0335  | HLA-A24:114 | HLA-B27:24 |
| DRB1_0453  | HLA-A24:115 | HLA-B27:25 |
| DRB1_0475  | HLA-A24:116 | HLA-B27:26 |
| DRB1_0907  | HLA-A24:117 | HLA-B27:27 |
| DRB1_1182  | HLA-A24:118 | HLA-B27:28 |
| DRB1_13100 | HLA-A24:119 | HLA-B27:29 |
| DRB1_1453  | HLA-A24:120 | HLA-B27:30 |
| DRB1_1455  | HLA-A24:121 | HLA-B27:31 |
| DRB1_1479  | HLA-A24:122 | HLA-B27:32 |
| DRB3_0209  | HLA-A24:123 | HLA-B27:33 |
| DRB3_0221  | HLA-A24:124 | HLA-B27:34 |
| DRB5_0112  | HLA-A24:125 | HLA-B27:35 |
| DRB1_0314  | HLA-A24:126 | HLA-B27:36 |
| DRB1_0327  | HLA-A24:127 | HLA-B27:37 |
| DRB1_0408  | HLA-A24:128 | HLA-B27:38 |
| DRB1_0419  | HLA-A24:129 | HLA-B27:39 |
| DRB1_0449  | HLA-A24:13  | HLA-B27:40 |
| DRB1_0461  | HLA-A24:130 | HLA-B27:41 |
| DRB1_0462  | HLA-A24:131 | HLA-B27:42 |
| DRB1_0825  | HLA-A24:133 | HLA-B27:43 |
| DRB1_1180  | HLA-A24:134 | HLA-B27:44 |
| DRB1_1187  | HLA-A24:135 | HLA-B27:45 |
| DRB1_1339  | HLA-A24:136 | HLA-B27:46 |
| DRB1_1341  | HLA-A24:137 | HLA-B27:47 |

|           |             |             |
|-----------|-------------|-------------|
| DRB1_1376 | HLA-A24:138 | HLA-B27:48  |
| DRB1_1471 | HLA-A24:139 | HLA-B27:49  |
| DRB1_1473 | HLA-A24:14  | HLA-B27:50  |
| DRB1_1525 | HLA-A24:140 | HLA-B27:51  |
| DRB1_1605 | HLA-A24:141 | HLA-B27:52  |
| DRB1_1607 | HLA-A24:142 | HLA-B27:53  |
| DRB3_0205 | HLA-A24:143 | HLA-B27:54  |
| DRB1_0438 | HLA-A24:144 | HLA-B27:55  |
| DRB1_0443 | HLA-A24:15  | HLA-B27:56  |
| DRB1_0444 | HLA-A24:17  | HLA-B27:57  |
| DRB1_0451 | HLA-A24:18  | HLA-B27:58  |
| DRB1_0473 | HLA-A24:19  | HLA-B27:60  |
| DRB1_0704 | HLA-A24:20  | HLA-B27:61  |
| DRB1_0811 | HLA-A24:21  | HLA-B27:62  |
| DRB1_1131 | HLA-A24:22  | HLA-B27:63  |
| DRB1_1137 | HLA-A24:23  | HLA-B27:67  |
| DRB1_1189 | HLA-A24:24  | HLA-B27:68  |
| DRB1_1307 | HLA-A24:25  | HLA-B27:69  |
| DRB1_1401 | HLA-A24:26  | HLA-B35:01  |
| DRB1_1403 | HLA-A24:27  | HLA-B35:02  |
| DRB1_1426 | HLA-A24:28  | HLA-B35:03  |
| DRB1_1435 | HLA-A24:29  | HLA-B35:04  |
| DRB1_1440 | HLA-A24:30  | HLA-B35:05  |
| DRB1_1454 | HLA-A24:31  | HLA-B35:06  |
| DRB1_1458 | HLA-A24:32  | HLA-B35:07  |
| DRB1_1460 | HLA-A24:33  | HLA-B35:08  |
| DRB1_1470 | HLA-A24:34  | HLA-B35:09  |
| DRB1_1472 | HLA-A24:35  | HLA-B35:10  |
| DRB1_1477 | HLA-A24:37  | HLA-B35:100 |
| DRB1_1486 | HLA-A24:38  | HLA-B35:101 |
| DRB1_1487 | HLA-A24:39  | HLA-B35:102 |
| DRB1_1488 | HLA-A24:41  | HLA-B35:103 |
| DRB1_1490 | HLA-A24:42  | HLA-B35:104 |
| DRB1_1497 | HLA-A24:43  | HLA-B35:105 |
| DRB1_1609 | HLA-A24:44  | HLA-B35:106 |
| DRB3_0211 | HLA-A24:46  | HLA-B35:107 |
| DRB3_0222 | HLA-A24:47  | HLA-B35:108 |
| DRB3_0225 | HLA-A24:49  | HLA-B35:109 |
| DRB5_0104 | HLA-A24:50  | HLA-B35:11  |
| DRB1_0302 | HLA-A24:51  | HLA-B35:110 |
| DRB1_0313 | HLA-A24:52  | HLA-B35:111 |
| DRB1_0341 | HLA-A24:53  | HLA-B35:112 |

|           |            |             |
|-----------|------------|-------------|
| DRB1_0353 | HLA-A24:54 | HLA-B35:113 |
| DRB1_0403 | HLA-A24:55 | HLA-B35:114 |
| DRB1_0406 | HLA-A24:56 | HLA-B35:115 |
| DRB1_0418 | HLA-A24:57 | HLA-B35:116 |
| DRB1_0427 | HLA-A24:58 | HLA-B35:117 |
| DRB1_0439 | HLA-A24:59 | HLA-B35:118 |
| DRB1_0441 | HLA-A24:61 | HLA-B35:119 |
| DRB1_0447 | HLA-A24:62 | HLA-B35:12  |
| DRB1_0452 | HLA-A24:63 | HLA-B35:120 |
| DRB1_0460 | HLA-A24:64 | HLA-B35:121 |
| DRB1_0471 | HLA-A24:66 | HLA-B35:122 |
| DRB1_0485 | HLA-A24:67 | HLA-B35:123 |
| DRB1_0486 | HLA-A24:68 | HLA-B35:124 |
| DRB1_0905 | HLA-A24:69 | HLA-B35:125 |
| DRB1_1152 | HLA-A24:70 | HLA-B35:126 |
| DRB1_1222 | HLA-A24:71 | HLA-B35:127 |
| DRB1_1326 | HLA-A24:72 | HLA-B35:128 |
| DRB1_1396 | HLA-A24:73 | HLA-B35:13  |
| DRB1_1408 | HLA-A24:74 | HLA-B35:131 |
| DRB1_1442 | HLA-A24:75 | HLA-B35:132 |
| DRB1_1475 | HLA-A24:76 | HLA-B35:133 |
| DRB1_1499 | HLA-A24:77 | HLA-B35:135 |
| DRB1_1530 | HLA-A24:78 | HLA-B35:136 |
| DRB3_0105 | HLA-A24:79 | HLA-B35:137 |
| DRB3_0216 | HLA-A24:80 | HLA-B35:138 |
| DRB1_0338 | HLA-A24:81 | HLA-B35:139 |
| DRB1_0340 | HLA-A24:82 | HLA-B35:14  |
| DRB1_0342 | HLA-A24:85 | HLA-B35:140 |
| DRB1_0456 | HLA-A24:87 | HLA-B35:141 |
| DRB1_0459 | HLA-A24:88 | HLA-B35:142 |
| DRB1_0802 | HLA-A24:89 | HLA-B35:143 |
| DRB1_0807 | HLA-A24:91 | HLA-B35:144 |
| DRB1_0809 | HLA-A24:92 | HLA-B35:15  |
| DRB1_0819 | HLA-A24:93 | HLA-B35:16  |
| DRB1_0821 | HLA-A24:94 | HLA-B35:17  |
| DRB1_0830 | HLA-A24:95 | HLA-B35:18  |
| DRB1_0834 | HLA-A24:96 | HLA-B35:19  |
| DRB1_1127 | HLA-A24:97 | HLA-B35:20  |
| DRB1_1132 | HLA-A24:98 | HLA-B35:21  |
| DRB1_1145 | HLA-A24:99 | HLA-B35:22  |
| DRB1_1169 | HLA-A25:01 | HLA-B35:23  |
| DRB1_1196 | HLA-A25:02 | HLA-B35:24  |

|           |            |            |
|-----------|------------|------------|
| DRB1_1414 | HLA-A25:03 | HLA-B35:25 |
| DRB1_1422 | HLA-A25:04 | HLA-B35:26 |
| DRB1_1425 | HLA-A25:05 | HLA-B35:27 |
| DRB1_1436 | HLA-A25:06 | HLA-B35:28 |
| DRB1_1439 | HLA-A25:07 | HLA-B35:29 |
| DRB1_1444 | HLA-A25:08 | HLA-B35:30 |
| DRB1_1445 | HLA-A25:09 | HLA-B35:31 |
| DRB1_1450 | HLA-A25:10 | HLA-B35:32 |
| DRB1_1451 | HLA-A25:11 | HLA-B35:33 |
| DRB1_1468 | HLA-A25:13 | HLA-B35:34 |
| DRB3_0101 | HLA-A26:01 | HLA-B35:35 |
| DRB3_0104 | HLA-A26:02 | HLA-B35:36 |
| DRB3_0108 | HLA-A26:03 | HLA-B35:37 |
| DRB3_0111 | HLA-A26:04 | HLA-B35:38 |
| DRB3_0112 | HLA-A26:05 | HLA-B35:39 |
| DRB3_0113 | HLA-A26:06 | HLA-B35:41 |
| DRB3_0303 | HLA-A26:07 | HLA-B35:42 |
| DRB1_0305 | HLA-A26:08 | HLA-B35:43 |
| DRB1_0329 | HLA-A26:09 | HLA-B35:44 |
| DRB1_0465 | HLA-A26:10 | HLA-B35:45 |
| DRB1_0478 | HLA-A26:12 | HLA-B35:46 |
| DRB1_1153 | HLA-A26:13 | HLA-B35:47 |
| DRB1_1407 | HLA-A26:14 | HLA-B35:48 |
| DRB1_1482 | HLA-A26:15 | HLA-B35:49 |
| DRB1_1529 | HLA-A26:16 | HLA-B35:50 |
| DRB1_1537 | HLA-A26:17 | HLA-B35:51 |
| DRB1_1601 | HLA-A26:18 | HLA-B35:52 |
| DRB1_1603 | HLA-A26:19 | HLA-B35:54 |
| DRB1_1608 | HLA-A26:20 | HLA-B35:55 |
| DRB3_0109 | HLA-A26:21 | HLA-B35:56 |
| DRB3_0114 | HLA-A26:22 | HLA-B35:57 |
| DRB3_0219 | HLA-A26:23 | HLA-B35:58 |
| DRB1_0310 | HLA-A26:24 | HLA-B35:59 |
| DRB1_0319 | HLA-A26:26 | HLA-B35:60 |
| DRB1_0402 | HLA-A26:27 | HLA-B35:61 |
| DRB1_0431 | HLA-A26:28 | HLA-B35:62 |
| DRB1_0808 | HLA-A26:29 | HLA-B35:63 |
| DRB1_1438 | HLA-A26:30 | HLA-B35:64 |
| DRB1_1457 | HLA-A26:31 | HLA-B35:66 |
| DRB1_1467 | HLA-A26:32 | HLA-B35:67 |
| DRB1_1489 | HLA-A26:33 | HLA-B35:68 |
| DRB1_1502 | HLA-A26:34 | HLA-B35:69 |

|           |            |            |
|-----------|------------|------------|
| DRB1_1508 | HLA-A26:35 | HLA-B35:70 |
| DRB1_1511 | HLA-A26:36 | HLA-B35:71 |
| DRB1_1514 | HLA-A26:37 | HLA-B35:72 |
| DRB1_1515 | HLA-A26:38 | HLA-B35:74 |
| DRB1_1519 | HLA-A26:39 | HLA-B35:75 |
| DRB1_1526 | HLA-A26:40 | HLA-B35:76 |
| DRB1_1539 | HLA-A26:41 | HLA-B35:77 |
| DRB1_1544 | HLA-A26:42 | HLA-B35:78 |
| DRB1_1547 | HLA-A26:43 | HLA-B35:79 |
| DRB1_0407 | HLA-A26:45 | HLA-B35:80 |
| DRB1_0414 | HLA-A26:46 | HLA-B35:81 |
| DRB1_0454 | HLA-A26:47 | HLA-B35:82 |
| DRB1_0469 | HLA-A26:48 | HLA-B35:83 |
| DRB1_0474 | HLA-A26:49 | HLA-B35:84 |
| DRB1_0482 | HLA-A26:50 | HLA-B35:85 |
| DRB1_0488 | HLA-A29:01 | HLA-B35:86 |
| DRB1_0815 | HLA-A29:02 | HLA-B35:87 |
| DRB1_1347 | HLA-A29:03 | HLA-B35:88 |
| DRB1_1410 | HLA-A29:04 | HLA-B35:89 |
| DRB1_1427 | HLA-A29:05 | HLA-B35:90 |
| DRB1_1493 | HLA-A29:06 | HLA-B35:91 |
| DRB1_1498 | HLA-A29:07 | HLA-B35:92 |
| DRB1_1538 | HLA-A29:09 | HLA-B35:93 |
| DRB1_1604 | HLA-A29:10 | HLA-B35:94 |
| DRB3_0217 | HLA-A29:11 | HLA-B35:95 |
|           | HLA-A29:12 | HLA-B35:96 |
|           | HLA-A29:13 | HLA-B35:97 |
|           | HLA-A29:14 | HLA-B35:98 |
|           | HLA-A29:15 | HLA-B35:99 |
|           | HLA-A29:16 | HLA-B37:01 |
|           | HLA-A29:17 | HLA-B37:02 |
|           | HLA-A29:18 | HLA-B37:04 |
|           | HLA-A29:19 | HLA-B37:05 |
|           | HLA-A29:20 | HLA-B37:06 |
|           | HLA-A29:21 | HLA-B37:07 |
|           | HLA-A29:22 | HLA-B37:08 |
|           | HLA-A30:01 | HLA-B37:09 |
|           | HLA-A30:02 | HLA-B37:10 |
|           | HLA-A30:03 | HLA-B37:11 |
|           | HLA-A30:04 | HLA-B37:12 |
|           | HLA-A30:06 | HLA-B37:13 |
|           | HLA-A30:07 | HLA-B37:14 |

|            |            |
|------------|------------|
| HLA-A30:08 | HLA-B37:15 |
| HLA-A30:09 | HLA-B37:17 |
| HLA-A30:10 | HLA-B37:18 |
| HLA-A30:11 | HLA-B37:19 |
| HLA-A30:12 | HLA-B37:20 |
| HLA-A30:13 | HLA-B37:21 |
| HLA-A30:15 | HLA-B37:22 |
| HLA-A30:16 | HLA-B37:23 |
| HLA-A30:17 | HLA-B38:01 |
| HLA-A30:18 | HLA-B38:02 |
| HLA-A30:19 | HLA-B38:03 |
| HLA-A30:20 | HLA-B38:04 |
| HLA-A30:22 | HLA-B38:05 |
| HLA-A30:23 | HLA-B38:06 |
| HLA-A30:24 | HLA-B38:07 |
| HLA-A30:25 | HLA-B38:08 |
| HLA-A30:26 | HLA-B38:09 |
| HLA-A30:28 | HLA-B38:10 |
| HLA-A30:29 | HLA-B38:11 |
| HLA-A30:30 | HLA-B38:12 |
| HLA-A30:31 | HLA-B38:13 |
| HLA-A30:32 | HLA-B38:14 |
| HLA-A30:33 | HLA-B38:15 |
| HLA-A30:34 | HLA-B38:16 |
| HLA-A30:35 | HLA-B38:17 |
| HLA-A30:36 | HLA-B38:18 |
| HLA-A30:37 | HLA-B38:19 |
| HLA-A30:38 | HLA-B38:20 |
| HLA-A30:39 | HLA-B38:21 |
| HLA-A30:40 | HLA-B38:22 |
| HLA-A30:41 | HLA-B38:23 |
| HLA-A31:01 | HLA-B39:01 |
| HLA-A31:02 | HLA-B39:02 |
| HLA-A31:03 | HLA-B39:03 |
| HLA-A31:04 | HLA-B39:04 |
| HLA-A31:05 | HLA-B39:05 |
| HLA-A31:06 | HLA-B39:06 |
| HLA-A31:07 | HLA-B39:07 |
| HLA-A31:08 | HLA-B39:08 |
| HLA-A31:09 | HLA-B39:09 |
| HLA-A31:10 | HLA-B39:10 |
| HLA-A31:11 | HLA-B39:11 |

|            |            |
|------------|------------|
| HLA-A31:12 | HLA-B39:12 |
| HLA-A31:13 | HLA-B39:13 |
| HLA-A31:15 | HLA-B39:14 |
| HLA-A31:16 | HLA-B39:15 |
| HLA-A31:17 | HLA-B39:16 |
| HLA-A31:18 | HLA-B39:17 |
| HLA-A31:19 | HLA-B39:18 |
| HLA-A31:20 | HLA-B39:19 |
| HLA-A31:21 | HLA-B39:20 |
| HLA-A31:22 | HLA-B39:22 |
| HLA-A31:23 | HLA-B39:23 |
| HLA-A31:24 | HLA-B39:24 |
| HLA-A31:25 | HLA-B39:26 |
| HLA-A31:26 | HLA-B39:27 |
| HLA-A31:27 | HLA-B39:28 |
| HLA-A31:28 | HLA-B39:29 |
| HLA-A31:29 | HLA-B39:30 |
| HLA-A31:30 | HLA-B39:31 |
| HLA-A31:31 | HLA-B39:32 |
| HLA-A31:32 | HLA-B39:33 |
| HLA-A31:33 | HLA-B39:34 |
| HLA-A31:34 | HLA-B39:35 |
| HLA-A31:35 | HLA-B39:36 |
| HLA-A31:36 | HLA-B39:37 |
| HLA-A31:37 | HLA-B39:39 |
| HLA-A32:01 | HLA-B39:41 |
| HLA-A32:02 | HLA-B39:42 |
| HLA-A32:03 | HLA-B39:43 |
| HLA-A32:04 | HLA-B39:44 |
| HLA-A32:05 | HLA-B39:45 |
| HLA-A32:06 | HLA-B39:46 |
| HLA-A32:07 | HLA-B39:47 |
| HLA-A32:08 | HLA-B39:48 |
| HLA-A32:09 | HLA-B39:49 |
| HLA-A32:10 | HLA-B39:50 |
| HLA-A32:12 | HLA-B39:51 |
| HLA-A32:13 | HLA-B39:52 |
| HLA-A32:14 | HLA-B39:53 |
| HLA-A32:15 | HLA-B39:54 |
| HLA-A32:16 | HLA-B39:55 |
| HLA-A32:17 | HLA-B39:56 |
| HLA-A32:18 | HLA-B39:57 |

|            |             |
|------------|-------------|
| HLA-A32:20 | HLA-B39:58  |
| HLA-A32:21 | HLA-B39:59  |
| HLA-A32:22 | HLA-B39:60  |
| HLA-A32:23 | HLA-B40:01  |
| HLA-A32:24 | HLA-B40:02  |
| HLA-A32:25 | HLA-B40:03  |
| HLA-A33:01 | HLA-B40:04  |
| HLA-A33:03 | HLA-B40:05  |
| HLA-A33:04 | HLA-B40:06  |
| HLA-A33:05 | HLA-B40:07  |
| HLA-A33:06 | HLA-B40:08  |
| HLA-A33:07 | HLA-B40:09  |
| HLA-A33:08 | HLA-B40:10  |
| HLA-A33:09 | HLA-B40:100 |
| HLA-A33:10 | HLA-B40:101 |
| HLA-A33:11 | HLA-B40:102 |
| HLA-A33:12 | HLA-B40:103 |
| HLA-A33:13 | HLA-B40:104 |
| HLA-A33:14 | HLA-B40:105 |
| HLA-A33:15 | HLA-B40:106 |
| HLA-A33:16 | HLA-B40:107 |
| HLA-A33:17 | HLA-B40:108 |
| HLA-A33:18 | HLA-B40:109 |
| HLA-A33:19 | HLA-B40:11  |
| HLA-A33:20 | HLA-B40:110 |
| HLA-A33:21 | HLA-B40:111 |
| HLA-A33:22 | HLA-B40:112 |
| HLA-A33:23 | HLA-B40:113 |
| HLA-A33:24 | HLA-B40:114 |
| HLA-A33:25 | HLA-B40:115 |
| HLA-A33:26 | HLA-B40:116 |
| HLA-A33:27 | HLA-B40:117 |
| HLA-A33:28 | HLA-B40:119 |
| HLA-A33:29 | HLA-B40:12  |
| HLA-A33:30 | HLA-B40:120 |
| HLA-A33:31 | HLA-B40:121 |
| HLA-A34:01 | HLA-B40:122 |
| HLA-A34:02 | HLA-B40:123 |
| HLA-A34:03 | HLA-B40:124 |
| HLA-A34:04 | HLA-B40:125 |
| HLA-A34:05 | HLA-B40:126 |
| HLA-A34:06 | HLA-B40:127 |

|            |             |
|------------|-------------|
| HLA-A34:07 | HLA-B40:128 |
| HLA-A34:08 | HLA-B40:129 |
| HLA-A36:01 | HLA-B40:13  |
| HLA-A36:02 | HLA-B40:130 |
| HLA-A36:03 | HLA-B40:131 |
| HLA-A36:04 | HLA-B40:132 |
| HLA-A36:05 | HLA-B40:134 |
| HLA-A43:01 | HLA-B40:135 |
| HLA-A66:01 | HLA-B40:136 |
| HLA-A66:02 | HLA-B40:137 |
| HLA-A66:03 | HLA-B40:138 |
| HLA-A66:04 | HLA-B40:139 |
| HLA-A66:05 | HLA-B40:14  |
| HLA-A66:06 | HLA-B40:140 |
| HLA-A66:07 | HLA-B40:141 |
| HLA-A66:08 | HLA-B40:143 |
| HLA-A66:09 | HLA-B40:145 |
| HLA-A66:10 | HLA-B40:146 |
| HLA-A66:11 | HLA-B40:147 |
| HLA-A66:12 | HLA-B40:15  |
| HLA-A66:13 | HLA-B40:16  |
| HLA-A66:14 | HLA-B40:18  |
| HLA-A66:15 | HLA-B40:19  |
| HLA-A68:01 | HLA-B40:20  |
| HLA-A68:02 | HLA-B40:21  |
| HLA-A68:03 | HLA-B40:23  |
| HLA-A68:04 | HLA-B40:24  |
| HLA-A68:05 | HLA-B40:25  |
| HLA-A68:06 | HLA-B40:26  |
| HLA-A68:07 | HLA-B40:27  |
| HLA-A68:08 | HLA-B40:28  |
| HLA-A68:09 | HLA-B40:29  |
| HLA-A68:10 | HLA-B40:30  |
| HLA-A68:12 | HLA-B40:31  |
| HLA-A68:13 | HLA-B40:32  |
| HLA-A68:14 | HLA-B40:33  |
| HLA-A68:15 | HLA-B40:34  |
| HLA-A68:16 | HLA-B40:35  |
| HLA-A68:17 | HLA-B40:36  |
| HLA-A68:19 | HLA-B40:37  |
| HLA-A68:20 | HLA-B40:38  |
| HLA-A68:21 | HLA-B40:39  |

|            |            |
|------------|------------|
| HLA-A68:22 | HLA-B40:40 |
| HLA-A68:23 | HLA-B40:42 |
| HLA-A68:24 | HLA-B40:43 |
| HLA-A68:25 | HLA-B40:44 |
| HLA-A68:26 | HLA-B40:45 |
| HLA-A68:27 | HLA-B40:46 |
| HLA-A68:28 | HLA-B40:47 |
| HLA-A68:29 | HLA-B40:48 |
| HLA-A68:30 | HLA-B40:49 |
| HLA-A68:31 | HLA-B40:50 |
| HLA-A68:32 | HLA-B40:51 |
| HLA-A68:33 | HLA-B40:52 |
| HLA-A68:34 | HLA-B40:53 |
| HLA-A68:35 | HLA-B40:54 |
| HLA-A68:36 | HLA-B40:55 |
| HLA-A68:37 | HLA-B40:56 |
| HLA-A68:38 | HLA-B40:57 |
| HLA-A68:39 | HLA-B40:58 |
| HLA-A68:40 | HLA-B40:59 |
| HLA-A68:41 | HLA-B40:60 |
| HLA-A68:42 | HLA-B40:61 |
| HLA-A68:43 | HLA-B40:62 |
| HLA-A68:44 | HLA-B40:63 |
| HLA-A68:45 | HLA-B40:64 |
| HLA-A68:46 | HLA-B40:65 |
| HLA-A68:47 | HLA-B40:66 |
| HLA-A68:48 | HLA-B40:67 |
| HLA-A68:50 | HLA-B40:68 |
| HLA-A68:51 | HLA-B40:69 |
| HLA-A68:52 | HLA-B40:70 |
| HLA-A68:53 | HLA-B40:71 |
| HLA-A68:54 | HLA-B40:72 |
| HLA-A69:01 | HLA-B40:73 |
| HLA-A74:01 | HLA-B40:74 |
| HLA-A74:02 | HLA-B40:75 |
| HLA-A74:03 | HLA-B40:76 |
| HLA-A74:04 | HLA-B40:77 |
| HLA-A74:05 | HLA-B40:78 |
| HLA-A74:06 | HLA-B40:79 |
| HLA-A74:07 | HLA-B40:80 |
| HLA-A74:08 | HLA-B40:81 |
| HLA-A74:09 | HLA-B40:82 |

HLA-A74:10  
HLA-A74:11  
HLA-A74:13  
HLA-A80:01  
HLA-A80:02

HLA-B40:83  
HLA-B40:84  
HLA-B40:85  
HLA-B40:86  
HLA-B40:87  
HLA-B40:88  
HLA-B40:89  
HLA-B40:90  
HLA-B40:91  
HLA-B40:92  
HLA-B40:93  
HLA-B40:94  
HLA-B40:95  
HLA-B40:96  
HLA-B40:97  
HLA-B40:98  
HLA-B40:99  
HLA-B41:01  
HLA-B41:02  
HLA-B41:03  
HLA-B41:04  
HLA-B41:05  
HLA-B41:06  
HLA-B41:07  
HLA-B41:08  
HLA-B41:09  
HLA-B41:10  
HLA-B41:11  
HLA-B41:12  
HLA-B42:01  
HLA-B42:02  
HLA-B42:04  
HLA-B42:05  
HLA-B42:06  
HLA-B42:07  
HLA-B42:08  
HLA-B42:09  
HLA-B42:10  
HLA-B42:11  
HLA-B42:12  
HLA-B42:13  
HLA-B42:14

HLA-B44:02  
HLA-B44:03  
HLA-B44:04  
HLA-B44:05  
HLA-B44:06  
HLA-B44:07  
HLA-B44:08  
HLA-B44:09  
HLA-B44:10  
HLA-B44:100  
HLA-B44:101  
HLA-B44:102  
HLA-B44:103  
HLA-B44:104  
HLA-B44:105  
HLA-B44:106  
HLA-B44:107  
HLA-B44:109  
HLA-B44:11  
HLA-B44:110  
HLA-B44:12  
HLA-B44:13  
HLA-B44:14  
HLA-B44:15  
HLA-B44:16  
HLA-B44:17  
HLA-B44:18  
HLA-B44:20  
HLA-B44:21  
HLA-B44:22  
HLA-B44:24  
HLA-B44:25  
HLA-B44:26  
HLA-B44:27  
HLA-B44:28  
HLA-B44:29  
HLA-B44:30  
HLA-B44:31  
HLA-B44:32  
HLA-B44:33  
HLA-B44:34  
HLA-B44:35

HLA-B44:36  
HLA-B44:37  
HLA-B44:38  
HLA-B44:39  
HLA-B44:40  
HLA-B44:41  
HLA-B44:42  
HLA-B44:43  
HLA-B44:44  
HLA-B44:45  
HLA-B44:46  
HLA-B44:47  
HLA-B44:48  
HLA-B44:49  
HLA-B44:50  
HLA-B44:51  
HLA-B44:53  
HLA-B44:54  
HLA-B44:55  
HLA-B44:57  
HLA-B44:59  
HLA-B44:60  
HLA-B44:62  
HLA-B44:63  
HLA-B44:64  
HLA-B44:65  
HLA-B44:66  
HLA-B44:67  
HLA-B44:68  
HLA-B44:69  
HLA-B44:70  
HLA-B44:71  
HLA-B44:72  
HLA-B44:73  
HLA-B44:74  
HLA-B44:75  
HLA-B44:76  
HLA-B44:77  
HLA-B44:78  
HLA-B44:79  
HLA-B44:80  
HLA-B44:81

HLA-B44:82  
HLA-B44:83  
HLA-B44:84  
HLA-B44:85  
HLA-B44:86  
HLA-B44:87  
HLA-B44:88  
HLA-B44:89  
HLA-B44:90  
HLA-B44:91  
HLA-B44:92  
HLA-B44:93  
HLA-B44:94  
HLA-B44:95  
HLA-B44:96  
HLA-B44:97  
HLA-B44:98  
HLA-B44:99  
HLA-B45:01  
HLA-B45:02  
HLA-B45:03  
HLA-B45:04  
HLA-B45:05  
HLA-B45:06  
HLA-B45:07  
HLA-B45:08  
HLA-B45:09  
HLA-B45:10  
HLA-B45:11  
HLA-B45:12  
HLA-B46:01  
HLA-B46:02  
HLA-B46:03  
HLA-B46:04  
HLA-B46:05  
HLA-B46:06  
HLA-B46:08  
HLA-B46:09  
HLA-B46:10  
HLA-B46:11  
HLA-B46:12  
HLA-B46:13

HLA-B46:14  
HLA-B46:16  
HLA-B46:17  
HLA-B46:18  
HLA-B46:19  
HLA-B46:20  
HLA-B46:21  
HLA-B46:22  
HLA-B46:23  
HLA-B46:24  
HLA-B47:01  
HLA-B47:02  
HLA-B47:03  
HLA-B47:04  
HLA-B47:05  
HLA-B47:06  
HLA-B47:07  
HLA-B48:01  
HLA-B48:02  
HLA-B48:03  
HLA-B48:04  
HLA-B48:05  
HLA-B48:06  
HLA-B48:07  
HLA-B48:08  
HLA-B48:09  
HLA-B48:10  
HLA-B48:11  
HLA-B48:12  
HLA-B48:13  
HLA-B48:14  
HLA-B48:15  
HLA-B48:16  
HLA-B48:17  
HLA-B48:18  
HLA-B48:19  
HLA-B48:20  
HLA-B48:21  
HLA-B48:22  
HLA-B48:23  
HLA-B49:01  
HLA-B49:02

HLA-B49:03  
HLA-B49:04  
HLA-B49:05  
HLA-B49:06  
HLA-B49:07  
HLA-B49:08  
HLA-B49:09  
HLA-B49:10  
HLA-B50:01  
HLA-B50:02  
HLA-B50:04  
HLA-B50:05  
HLA-B50:06  
HLA-B50:07  
HLA-B50:08  
HLA-B50:09  
HLA-B51:01  
HLA-B51:02  
HLA-B51:03  
HLA-B51:04  
HLA-B51:05  
HLA-B51:06  
HLA-B51:07  
HLA-B51:08  
HLA-B51:09  
HLA-B51:12  
HLA-B51:13  
HLA-B51:14  
HLA-B51:15  
HLA-B51:16  
HLA-B51:17  
HLA-B51:18  
HLA-B51:19  
HLA-B51:20  
HLA-B51:21  
HLA-B51:22  
HLA-B51:23  
HLA-B51:24  
HLA-B51:26  
HLA-B51:28  
HLA-B51:29  
HLA-B51:30

HLA-B51:31  
HLA-B51:32  
HLA-B51:33  
HLA-B51:34  
HLA-B51:35  
HLA-B51:36  
HLA-B51:37  
HLA-B51:38  
HLA-B51:39  
HLA-B51:40  
HLA-B51:42  
HLA-B51:43  
HLA-B51:45  
HLA-B51:46  
HLA-B51:48  
HLA-B51:49  
HLA-B51:50  
HLA-B51:51  
HLA-B51:52  
HLA-B51:53  
HLA-B51:54  
HLA-B51:55  
HLA-B51:56  
HLA-B51:57  
HLA-B51:58  
HLA-B51:59  
HLA-B51:60  
HLA-B51:61  
HLA-B51:62  
HLA-B51:63  
HLA-B51:64  
HLA-B51:65  
HLA-B51:66  
HLA-B51:67  
HLA-B51:68  
HLA-B51:69  
HLA-B51:70  
HLA-B51:71  
HLA-B51:72  
HLA-B51:73  
HLA-B51:74  
HLA-B51:75

HLA-B51:76  
HLA-B51:77  
HLA-B51:78  
HLA-B51:79  
HLA-B51:80  
HLA-B51:81  
HLA-B51:82  
HLA-B51:83  
HLA-B51:84  
HLA-B51:85  
HLA-B51:86  
HLA-B51:87  
HLA-B51:88  
HLA-B51:89  
HLA-B51:90  
HLA-B51:91  
HLA-B51:92  
HLA-B51:93  
HLA-B51:94  
HLA-B51:95  
HLA-B51:96  
HLA-B52:01  
HLA-B52:02  
HLA-B52:03  
HLA-B52:04  
HLA-B52:05  
HLA-B52:06  
HLA-B52:07  
HLA-B52:08  
HLA-B52:09  
HLA-B52:10  
HLA-B52:11  
HLA-B52:12  
HLA-B52:13  
HLA-B52:14  
HLA-B52:15  
HLA-B52:16  
HLA-B52:17  
HLA-B52:18  
HLA-B52:19  
HLA-B52:20  
HLA-B52:21

HLA-B53:01  
HLA-B53:02  
HLA-B53:03  
HLA-B53:04  
HLA-B53:05  
HLA-B53:06  
HLA-B53:07  
HLA-B53:08  
HLA-B53:09  
HLA-B53:10  
HLA-B53:11  
HLA-B53:12  
HLA-B53:13  
HLA-B53:14  
HLA-B53:15  
HLA-B53:16  
HLA-B53:17  
HLA-B53:18  
HLA-B53:19  
HLA-B53:20  
HLA-B53:21  
HLA-B53:22  
HLA-B53:23  
HLA-B54:01  
HLA-B54:02  
HLA-B54:03  
HLA-B54:04  
HLA-B54:06  
HLA-B54:07  
HLA-B54:09  
HLA-B54:10  
HLA-B54:11  
HLA-B54:12  
HLA-B54:13  
HLA-B54:14  
HLA-B54:15  
HLA-B54:16  
HLA-B54:17  
HLA-B54:18  
HLA-B54:19  
HLA-B54:20  
HLA-B54:21

HLA-B54:22  
HLA-B54:23  
HLA-B55:01  
HLA-B55:02  
HLA-B55:03  
HLA-B55:04  
HLA-B55:05  
HLA-B55:07  
HLA-B55:08  
HLA-B55:09  
HLA-B55:10  
HLA-B55:11  
HLA-B55:12  
HLA-B55:13  
HLA-B55:14  
HLA-B55:15  
HLA-B55:16  
HLA-B55:17  
HLA-B55:18  
HLA-B55:19  
HLA-B55:20  
HLA-B55:21  
HLA-B55:22  
HLA-B55:23  
HLA-B55:24  
HLA-B55:25  
HLA-B55:26  
HLA-B55:27  
HLA-B55:28  
HLA-B55:29  
HLA-B55:30  
HLA-B55:31  
HLA-B55:32  
HLA-B55:33  
HLA-B55:34  
HLA-B55:35  
HLA-B55:36  
HLA-B55:37  
HLA-B55:38  
HLA-B55:39  
HLA-B55:40  
HLA-B55:41

HLA-B55:42  
HLA-B55:43  
HLA-B56:01  
HLA-B56:02  
HLA-B56:03  
HLA-B56:04  
HLA-B56:05  
HLA-B56:06  
HLA-B56:07  
HLA-B56:08  
HLA-B56:09  
HLA-B56:10  
HLA-B56:11  
HLA-B56:12  
HLA-B56:13  
HLA-B56:14  
HLA-B56:15  
HLA-B56:16  
HLA-B56:17  
HLA-B56:18  
HLA-B56:20  
HLA-B56:21  
HLA-B56:22  
HLA-B56:23  
HLA-B56:24  
HLA-B56:25  
HLA-B56:26  
HLA-B56:27  
HLA-B56:29  
HLA-B57:01  
HLA-B57:02  
HLA-B57:03  
HLA-B57:04  
HLA-B57:05  
HLA-B57:06  
HLA-B57:07  
HLA-B57:08  
HLA-B57:09  
HLA-B57:10  
HLA-B57:11  
HLA-B57:12  
HLA-B57:13

HLA-B57:14  
HLA-B57:15  
HLA-B57:16  
HLA-B57:17  
HLA-B57:18  
HLA-B57:19  
HLA-B57:20  
HLA-B57:21  
HLA-B57:22  
HLA-B57:23  
HLA-B57:24  
HLA-B57:25  
HLA-B57:26  
HLA-B57:27  
HLA-B57:29  
HLA-B57:30  
HLA-B57:31  
HLA-B57:32  
HLA-B58:01  
HLA-B58:02  
HLA-B58:04  
HLA-B58:05  
HLA-B58:06  
HLA-B58:07  
HLA-B58:08  
HLA-B58:09  
HLA-B58:11  
HLA-B58:12  
HLA-B58:13  
HLA-B58:14  
HLA-B58:15  
HLA-B58:16  
HLA-B58:18  
HLA-B58:19  
HLA-B58:20  
HLA-B58:21  
HLA-B58:22  
HLA-B58:23  
HLA-B58:24  
HLA-B58:25  
HLA-B58:26  
HLA-B58:27

HLA-B58:28  
HLA-B58:29  
HLA-B58:30  
HLA-B59:01  
HLA-B59:02  
HLA-B59:03  
HLA-B59:04  
HLA-B59:05  
HLA-B67:01  
HLA-B67:02  
HLA-B73:01  
HLA-B73:02  
HLA-B78:01  
HLA-B78:02  
HLA-B78:03  
HLA-B78:04  
HLA-B78:05  
HLA-B78:06  
HLA-B78:07  
HLA-B81:01  
HLA-B81:02  
HLA-B81:03  
HLA-B81:05  
HLA-B82:01  
HLA-B82:02  
HLA-B82:03  
HLA-B83:01
