# Supplementary material for: Equivalent T Cell Epitope Promiscuity in Ecologically Diverse Human Pathogens
Source: PubMed Central journal article supplement (PMC3739752; doi:10.1371/journal.pone.0073124), 2013-08-09
Supplement: pone.0073124.s006.pdf [file pone.0073124.s006.pdf]

| <b>Europe and the Americas</b> | <b>East Asia</b> | <b>Sub-Saharan Africa</b> | <b>India and East Africa</b> | <b>Oceania</b> |
|--------------------------------|------------------|---------------------------|------------------------------|----------------|
| HLA-A01:01                     | HLA-A02:01       | HLA-A01:01                | HLA-A01:01                   | HLA-A11:01     |
| HLA-A02:01                     | HLA-A02:06       | HLA-A02:01                | HLA-A02:01                   | HLA-A24:02     |
| HLA-A24:02                     | HLA-A02:07       | HLA-A02:02                | HLA-A03:01                   | HLA-A34:01     |
| HLA-A31:01                     | HLA-A11:01       | HLA-A03:01                | HLA-A11:01                   |                |
|                                | HLA-A24:02       | HLA-A23:01                | HLA-A24:02                   |                |
|                                | HLA-A33:03       | HLA-A29:02                | HLA-A26:01                   |                |
|                                |                  | HLA-A30:01                | HLA-A32:01                   |                |
|                                |                  | HLA-A30:02                | HLA-A33:03                   |                |
|                                |                  | HLA-A68:02                |                              |                |
| HLA-B40:02                     | HLA-B40:01       | HLA-B53:01                | HLA-B40:06                   | HLA-B40:01     |
| HLA-B35:01                     | HLA-B46:01       | HLA-B15:03                | HLA-B51:01                   | HLA-B56:02     |
| HLA-B07:02                     | HLA-B58:01       | HLA-B42:01                | HLA-B52:01                   | HLA-B15:02     |
| HLA-B08:01                     | HLA-B40:02       | HLA-B58:02                | HLA-B08:01                   | HLA-B40:02     |
| HLA-B39:06                     | HLA-B51:01       | HLA-B58:01                | HLA-B35:03                   | HLA-B38:02     |
| HLA-B44:02                     | HLA-B13:01       | HLA-B45:01                | HLA-B35:01                   | HLA-B56:01     |
| HLA-B27:05                     | HLA-B15:01       | HLA-B35:01                | HLA-B58:01                   | HLA-B35:05     |
| HLA-B15:04                     | HLA-B35:01       | HLA-B15:10                | HLA-B18:01                   | HLA-B13:01     |
| HLA-B35:05                     | HLA-B48:01       | HLA-B18:01                | HLA-B44:03                   | HLA-B48:01     |
| HLA-B51:01                     | HLA-B39:01       | HLA-B08:01                | HLA-B51:01                   | HLA-B15:06     |
| HLA-B48:01                     | HLA-B44:03       | HLA-B07:02                | HLA-B50:01                   |                |
| HLA-B39:05                     | HLA-B15:02       |                           | HLA-B57:01                   |                |
| HLA-B15:01                     | HLA-B54:01       |                           | HLA-B35:08                   |                |
| HLA-B40:04                     |                  |                           | HLA-B55:01                   |                |
|                                |                  |                           | HLA-B37:01                   |                |
| HLA-DRB1*03:01                 | HLA-DRB1*04:03   | HLA-DRB1*01:02            | HLA-DRB1*01:01               | HLA-DRB1*11:01 |
| HLA-DRB1*04:01                 | HLA-DRB1*04:05   | HLA-DRB1*03:01            | HLA-DRB1*03:01               | HLA-DRB1*12:02 |
| HLA-DRB1*04:07                 | HLA-DRB1*07:01   | HLA-DRB1*03:02            | HLA-DRB1*04:03               | HLA-DRB1*15:01 |
| HLA-DRB1*04:11                 | HLA-DRB1*08:03   | HLA-DRB1*07:01            | HLA-DRB1*07:01               | HLA-DRB1*15:02 |
| HLA-DRB1*07:01                 | HLA-DRB1*09:01   | HLA-DRB1*11:01            | HLA-DRB1*10:01               | HLA-DRB1*16:02 |
| HLA-DRB1*08:02                 | HLA-DRB1*11:01   | HLA-DRB1*11:02            | HLA-DRB1*11:01               |                |
| HLA-DRB1*08:07                 | HLA-DRB1*12:01   | HLA-DRB1*13:01            | HLA-DRB1*11:04               |                |
| HLA-DRB1*14:02                 | HLA-DRB1*12:02   | HLA-DRB1*13:02            | HLA-DRB1*13:01               |                |
| HLA-DRB1*15:01                 | HLA-DRB1*13:02   | HLA-DRB1*15:03            | HLA-DRB1*14:01               |                |
| HLA-DRB1*16:02                 | HLA-DRB1*14:01   |                           | HLA-DRB1*15:01               |                |
|                                | HLA-DRB1*15:01   |                           |                              |                |
|                                | HLA-DRB1*16:02   |                           |                              |                |
