# Supplementary material for: Equivalent T Cell Epitope Promiscuity in Ecologically Diverse Human Pathogens
Source: PubMed Central journal article supplement (PMC3739752; doi:10.1371/journal.pone.0073124), 2013-08-09
Supplement: pone.0073124.s007.pdf [file pone.0073124.s007.pdf]

| A01        | A02        | A03        | A24        | B07        | B08        | B27        | B44        | B58        | B62        |
|------------|------------|------------|------------|------------|------------|------------|------------|------------|------------|
| HLA-A01:01 | HLA-A02:01 | HLA-A02:65 | HLA-A23:01 | HLA-B07:02 | HLA-B08:01 | HLA-B14:01 | HLA-B15:46 | HLA-B15:16 | HLA-B13:09 |
| HLA-A01:03 | HLA-A02:02 | HLA-A02:80 | HLA-A23:02 | HLA-B07:03 | HLA-B08:02 | HLA-B14:02 | HLA-B15:53 | HLA-B15:17 | HLA-B13:13 |
| HLA-A01:06 | HLA-A02:03 | HLA-A03:01 | HLA-A23:03 | HLA-B07:04 | HLA-B08:03 | HLA-B14:03 | HLA-B18:01 | HLA-B15:67 | HLA-B15:01 |
| HLA-A01:07 | HLA-A02:04 | HLA-A03:02 | HLA-A23:04 | HLA-B07:05 | HLA-B08:07 | HLA-B14:05 | HLA-B18:02 | HLA-B15:95 | HLA-B15:02 |
| HLA-A01:08 | HLA-A02:05 | HLA-A03:04 | HLA-A23:05 | HLA-B07:06 | HLA-B08:09 | HLA-B14:06 | HLA-B18:03 | HLA-B57:01 | HLA-B15:04 |
| HLA-A01:09 | HLA-A02:06 | HLA-A03:05 | HLA-A23:06 | HLA-B07:07 | HLA-B08:11 | HLA-B15:03 | HLA-B18:05 | HLA-B57:02 | HLA-B15:05 |
| HLA-A01:10 | HLA-A02:07 | HLA-A03:06 | HLA-A23:10 | HLA-B07:09 | HLA-B08:12 | HLA-B15:09 | HLA-B18:06 | HLA-B57:03 | HLA-B15:07 |
| HLA-A01:12 | HLA-A02:09 | HLA-A03:07 | HLA-A23:12 | HLA-B07:12 | HLA-B08:13 | HLA-B15:10 | HLA-B18:10 | HLA-B57:04 | HLA-B15:12 |
| HLA-A01:14 | HLA-A02:11 | HLA-A03:08 | HLA-A24:02 | HLA-B07:14 | HLA-B08:15 | HLA-B15:18 | HLA-B18:11 | HLA-B57:05 | HLA-B15:13 |
| HLA-A25:01 | HLA-A02:12 | HLA-A03:10 | HLA-A24:03 | HLA-B07:16 | HLA-B08:16 | HLA-B15:23 | HLA-B18:13 | HLA-B57:06 | HLA-B15:14 |
| HLA-A25:02 | HLA-A02:13 | HLA-A03:12 | HLA-A24:05 | HLA-B07:17 | HLA-B08:18 | HLA-B15:37 | HLA-B18:14 | HLA-B57:07 | HLA-B15:15 |
| HLA-A25:04 | HLA-A02:16 | HLA-A03:13 | HLA-A24:06 | HLA-B07:18 | HLA-B08:20 | HLA-B15:47 | HLA-B18:15 | HLA-B57:08 | HLA-B15:19 |
| HLA-A26:01 | HLA-A02:18 | HLA-A03:14 | HLA-A24:08 | HLA-B07:19 | HLA-B08:21 | HLA-B15:49 | HLA-B18:19 | HLA-B57:09 | HLA-B15:20 |
| HLA-A26:02 | HLA-A02:19 | HLA-A03:16 | HLA-A24:10 | HLA-B07:20 | HLA-B08:22 | HLA-B15:51 | HLA-B18:20 | HLA-B58:01 | HLA-B15:24 |
| HLA-A26:03 | HLA-A02:20 | HLA-A03:17 | HLA-A24:13 | HLA-B07:21 | HLA-B08:23 | HLA-B15:52 | HLA-B37:04 | HLA-B58:02 | HLA-B15:25 |
| HLA-A26:04 | HLA-A02:21 | HLA-A11:01 | HLA-A24:17 | HLA-B07:22 | HLA-B08:24 | HLA-B15:54 | HLA-B40:01 | HLA-B58:04 | HLA-B15:28 |
| HLA-A26:05 | HLA-A02:22 | HLA-A11:02 | HLA-A24:18 | HLA-B07:23 | HLA-B08:25 | HLA-B15:61 | HLA-B40:02 | HLA-B58:05 | HLA-B15:30 |
| HLA-A26:06 | HLA-A02:24 | HLA-A11:03 | HLA-A24:20 | HLA-B07:24 |            | HLA-B15:62 | HLA-B40:03 | HLA-B58:06 | HLA-B15:31 |
| HLA-A26:07 | HLA-A02:25 | HLA-A11:04 | HLA-A24:21 | HLA-B07:25 |            | HLA-B15:68 | HLA-B40:04 | HLA-B58:07 | HLA-B15:33 |
| HLA-A26:08 | HLA-A02:26 | HLA-A11:05 | HLA-A24:22 | HLA-B07:26 |            | HLA-B15:69 | HLA-B40:05 | HLA-B58:08 | HLA-B15:34 |
| HLA-A26:09 | HLA-A02:27 | HLA-A11:06 | HLA-A24:23 | HLA-B07:31 |            | HLA-B15:72 | HLA-B40:06 | HLA-B58:09 | HLA-B15:35 |
| HLA-A26:10 | HLA-A02:28 | HLA-A11:07 | HLA-A24:25 | HLA-B07:33 |            | HLA-B15:74 | HLA-B40:09 | HLA-B58:11 | HLA-B15:38 |
| HLA-A26:12 | HLA-A02:30 | HLA-A11:08 | HLA-A24:26 | HLA-B07:34 |            | HLA-B15:80 | HLA-B40:10 |            | HLA-B15:39 |
| HLA-A26:13 | HLA-A02:31 | HLA-A11:09 | HLA-A24:27 | HLA-B07:35 |            | HLA-B15:90 | HLA-B40:11 |            | HLA-B15:40 |
| HLA-A26:14 | HLA-A02:36 | HLA-A11:10 | HLA-A24:28 | HLA-B07:36 |            | HLA-B15:91 | HLA-B40:14 |            | HLA-B15:42 |
| HLA-A26:15 | HLA-A02:37 | HLA-A11:12 | HLA-A24:29 | HLA-B07:37 |            | HLA-B15:93 | HLA-B40:15 |            | HLA-B15:45 |
| HLA-A26:17 | HLA-A02:38 | HLA-A11:13 | HLA-A24:30 | HLA-B07:39 |            | HLA-B15:98 | HLA-B40:16 |            | HLA-B15:48 |
| HLA-A26:18 | HLA-A02:39 | HLA-A11:14 | HLA-A24:33 | HLA-B07:40 |            | HLA-B15:99 | HLA-B40:18 |            | HLA-B15:50 |
| HLA-A26:19 | HLA-A02:40 | HLA-A11:15 | HLA-A24:34 | HLA-B07:41 |            | HLA-B27:01 | HLA-B40:19 |            | HLA-B15:55 |
| HLA-A26:21 | HLA-A02:41 | HLA-A11:16 | HLA-A24:35 | HLA-B07:42 |            | HLA-B27:02 | HLA-B40:20 |            | HLA-B15:58 |
| HLA-A26:22 | HLA-A02:42 | HLA-A11:20 | HLA-A24:37 | HLA-B07:43 |            | HLA-B27:03 | HLA-B40:23 |            | HLA-B15:60 |
| HLA-A26:23 | HLA-A02:44 | HLA-A11:22 | HLA-A24:38 | HLA-B35:01 |            | HLA-B27:04 | HLA-B40:24 |            | HLA-B15:63 |
| HLA-A26:24 | HLA-A02:45 | HLA-A11:23 | HLA-A24:39 | HLA-B35:02 |            | HLA-B27:05 | HLA-B40:26 |            | HLA-B15:65 |
| HLA-A26:26 | HLA-A02:46 | HLA-A31:01 | HLA-A24:41 | HLA-B35:03 |            | HLA-B27:06 | HLA-B40:28 |            | HLA-B15:70 |
| HLA-A30:02 | HLA-A02:47 | HLA-A31:03 | HLA-A24:42 | HLA-B35:04 |            | HLA-B27:07 | HLA-B40:29 |            | HLA-B15:73 |
| HLA-A30:03 | HLA-A02:48 | HLA-A31:04 | HLA-A24:43 | HLA-B35:05 |            | HLA-B27:09 | HLA-B40:30 |            | HLA-B15:75 |
| HLA-A30:04 | HLA-A02:49 | HLA-A31:05 | HLA-A24:44 | HLA-B35:06 |            | HLA-B27:10 | HLA-B40:33 |            | HLA-B15:78 |
| HLA-A30:06 | HLA-A02:50 | HLA-A31:06 | HLA-A24:46 | HLA-B35:07 |            | HLA-B27:11 | HLA-B40:34 |            | HLA-B15:81 |
| HLA-A30:09 | HLA-A02:51 | HLA-A31:09 | HLA-A24:47 | HLA-B35:08 |            | HLA-B27:13 | HLA-B40:35 |            | HLA-B15:82 |
| HLA-A30:12 | HLA-A02:54 | HLA-A31:11 | HLA-A24:49 | HLA-B35:09 |            | HLA-B27:14 | HLA-B40:36 |            | HLA-B15:83 |
| HLA-A31:10 | HLA-A02:56 | HLA-A31:12 | HLA-A24:52 | HLA-B35:11 |            | HLA-B27:15 | HLA-B40:38 |            | HLA-B15:85 |
| HLA-A32:01 | HLA-A02:57 | HLA-A33:01 | HLA-A29:01 | HLA-B35:12 |            | HLA-B27:17 | HLA-B40:39 |            | HLA-B15:86 |
| HLA-A32:02 | HLA-A02:58 | HLA-A33:03 | HLA-A29:02 | HLA-B35:14 |            | HLA-B27:19 | HLA-B40:40 |            | HLA-B15:88 |
| HLA-A32:03 | HLA-A02:59 | HLA-A33:04 | HLA-A29:03 | HLA-B35:15 |            | HLA-B27:20 | HLA-B40:42 |            | HLA-B15:92 |
| HLA-A32:04 | HLA-A02:60 | HLA-A33:05 | HLA-A29:05 | HLA-B35:17 |            | HLA-B27:21 | HLA-B40:43 |            | HLA-B15:96 |
| HLA-A32:05 | HLA-A02:61 | HLA-A33:06 | HLA-A29:06 | HLA-B35:18 |            | HLA-B27:24 | HLA-B40:44 |            | HLA-B15:97 |
| HLA-A32:06 | HLA-A02:62 | HLA-A33:07 | HLA-A29:09 | HLA-B35:21 |            | HLA-B27:25 | HLA-B40:45 |            | HLA-B35:28 |
| HLA-A32:07 | HLA-A02:63 | HLA-A34:02 | HLA-A29:10 | HLA-B35:22 |            | HLA-B27:27 | HLA-B40:47 |            | HLA-B40:21 |
| HLA-A32:08 | HLA-A02:66 | HLA-A34:03 | HLA-A29:11 | HLA-B35:24 |            | HLA-B27:28 | HLA-B40:48 |            | HLA-B44:08 |
| HLA-A32:09 | HLA-A02:67 | HLA-A34:04 | HLA-A29:12 | HLA-B35:29 |            | HLA-B27:30 | HLA-B40:49 |            | HLA-B46:01 |
| HLA-A32:10 | HLA-A02:68 | HLA-A34:06 | HLA-A29:13 | HLA-B35:30 |            | HLA-B38:01 | HLA-B40:50 |            | HLA-B46:02 |
| HLA-A36:03 | HLA-A02:69 | HLA-A66:01 |            | HLA-B35:31 |            | HLA-B38:05 | HLA-B40:51 |            | HLA-B46:03 |
| HLA-A74:10 | HLA-A02:70 | HLA-A66:02 |            | HLA-B35:32 |            | HLA-B38:09 | HLA-B40:52 |            | HLA-B46:04 |
| HLA-A80:01 | HLA-A02:71 | HLA-A66:03 |            | HLA-B35:33 |            | HLA-B38:10 | HLA-B40:53 |            | HLA-B46:05 |
| HLA-A02:52 | HLA-A02:72 | HLA-A66:04 |            | HLA-B35:34 |            | HLA-B38:11 | HLA-B40:54 |            | HLA-B52:01 |
| HLA-A30:01 | HLA-A02:73 | HLA-A68:01 |            | HLA-B35:35 |            | HLA-B39:01 | HLA-B40:55 |            | HLA-B52:02 |
| HLA-A30:08 | HLA-A02:74 | HLA-A68:03 |            | HLA-B35:36 |            | HLA-B39:02 | HLA-B40:56 |            | HLA-B52:03 |
| HLA-A30:11 | HLA-A02:75 | HLA-A68:04 |            | HLA-B35:37 |            | HLA-B39:03 | HLA-B40:57 |            | HLA-B52:04 |
| HLA-A30:13 | HLA-A02:77 | HLA-A68:05 |            | HLA-B35:38 |            | HLA-B39:04 | HLA-B40:58 |            | HLA-B52:05 |
| HLA-A30:15 | HLA-A02:78 | HLA-A68:08 |            | HLA-B35:39 |            | HLA-B39:05 | HLA-B40:59 |            | HLA-B52:07 |
| HLA-A68:06 | HLA-A02:79 | HLA-A68:09 |            | HLA-B35:41 |            | HLA-B39:06 | HLA-B41:02 |            | HLA-B52:08 |

HLA-A68:07 HLA-A02:84 HLA-A68:10  
HLA-A29:01 HLA-A02:85 HLA-A68:12  
HLA-A29:02 HLA-A02:86 HLA-A68:13  
HLA-A29:03 HLA-A68:02 HLA-A68:14  
HLA-A29:05 HLA-A68:15 HLA-A68:16  
HLA-A29:06 HLA-A68:27 HLA-A68:19  
HLA-A29:09 HLA-A68:28 HLA-A68:20  
HLA-A29:10 HLA-A69:01 HLA-A68:21  
HLA-A29:11 HLA-A68:22  
HLA-A29:12 HLA-A68:23  
HLA-A29:13 HLA-A68:24  
HLA-A68:25  
HLA-A68:26  
HLA-A74:01  
HLA-A74:02  
HLA-A74:03  
HLA-A74:04  
HLA-A74:05  
HLA-A74:06  
HLA-A74:07  
HLA-A74:08  
HLA-A74:09  
HLA-A74:11  
HLA-A02:52  
HLA-A30:01  
HLA-A30:08  
HLA-A30:11  
HLA-A30:13  
HLA-A30:15  
HLA-A68:06  
HLA-A68:07

HLA-B35:42  
HLA-B35:43  
HLA-B35:44  
HLA-B35:45  
HLA-B35:46  
HLA-B35:51  
HLA-B35:54  
HLA-B35:55  
HLA-B35:57  
HLA-B35:58  
HLA-B35:60  
HLA-B35:61  
HLA-B38:06  
HLA-B38:07  
HLA-B39:10  
HLA-B39:16  
HLA-B39:17  
HLA-B42:01  
HLA-B42:04  
HLA-B42:05  
HLA-B42:06  
HLA-B51:01  
HLA-B51:02  
HLA-B51:04  
HLA-B51:05  
HLA-B51:06  
HLA-B51:08  
HLA-B51:09  
HLA-B51:12  
HLA-B51:13  
HLA-B51:14  
HLA-B51:16  
HLA-B51:17  
HLA-B51:18  
HLA-B51:19  
HLA-B51:21  
HLA-B51:23  
HLA-B51:24  
HLA-B51:26  
HLA-B51:28  
HLA-B51:29  
HLA-B51:30  
HLA-B51:31  
HLA-B51:32  
HLA-B51:33  
HLA-B51:34  
HLA-B51:35  
HLA-B51:36  
HLA-B51:37  
HLA-B51:38  
HLA-B53:01  
HLA-B53:02  
HLA-B53:04  
HLA-B53:06  
HLA-B53:08  
HLA-B53:10  
HLA-B54:01  
HLA-B54:03  
HLA-B54:04  
HLA-B54:06  
HLA-B54:07  
HLA-B55:01

HLA-B39:07 HLA-B41:03  
HLA-B39:08 HLA-B41:04  
HLA-B39:09 HLA-B41:06  
HLA-B39:11 HLA-B41:07  
HLA-B39:13 HLA-B44:02  
HLA-B39:14 HLA-B44:03  
HLA-B39:15 HLA-B44:04  
HLA-B39:18 HLA-B44:05  
HLA-B39:23 HLA-B44:07  
HLA-B39:24 HLA-B44:13  
HLA-B39:26 HLA-B44:14  
HLA-B39:27 HLA-B44:16  
HLA-B39:28 HLA-B44:20  
HLA-B39:29 HLA-B44:21  
HLA-B39:30 HLA-B44:22  
HLA-B39:32 HLA-B44:24  
HLA-B39:33 HLA-B44:25  
HLA-B39:34 HLA-B44:26  
HLA-B40:12 HLA-B44:27  
HLA-B44:40 HLA-B44:28  
HLA-B48:01 HLA-B44:29  
HLA-B48:02 HLA-B44:30  
HLA-B48:03 HLA-B44:31  
HLA-B48:04 HLA-B44:32  
HLA-B48:05 HLA-B44:33  
HLA-B48:07 HLA-B44:34  
HLA-B48:08 HLA-B44:35  
HLA-B48:09 HLA-B44:36  
HLA-B48:10 HLA-B44:37  
HLA-B48:11 HLA-B44:38  
HLA-B48:12 HLA-B44:39  
HLA-B48:13 HLA-B44:41  
HLA-B55:18 HLA-B44:42  
HLA-B73:01 HLA-B45:01  
HLA-B45:02  
HLA-B45:03  
HLA-B45:04  
HLA-B45:05  
HLA-B45:07  
HLA-B47:04  
HLA-B47:05  
HLA-B49:04  
HLA-B50:01  
HLA-B50:02  
HLA-B50:04

HLA-B78:05

HLA-B55:03  
HLA-B55:04  
HLA-B55:05  
HLA-B55:07  
HLA-B55:08  
HLA-B55:09  
HLA-B55:10  
HLA-B55:11  
HLA-B55:13  
HLA-B55:14  
HLA-B55:15  
HLA-B55:17  
HLA-B55:19  
HLA-B56:01  
HLA-B56:02  
HLA-B56:03  
HLA-B56:04  
HLA-B56:05  
HLA-B56:09  
HLA-B56:10  
HLA-B56:11  
HLA-B56:12  
HLA-B56:13  
HLA-B56:15  
HLA-B56:16  
HLA-B67:01  
HLA-B78:01  
HLA-B78:02  
HLA-B78:04  
HLA-B81:01
